# Supplementary material
Source: Research Square preprint supplement (doi:10.21203/rs.3.rs-9151742/v1)
Supplement: Supplementary file 1 [file 245534047f234376f49c4e59.xlsx]

## Sheet: Ajmer
Row Labels	Jan	Feb	Mar	Apr	May	Jun	Jul	Aug	Sep	Oct	Nov	Dec	Ajmer Min Temp (1951-2021)
1951	6.58548	8.58536	15.6135	20.1367	26.1645	27.2753	26.7448	24.5955	24.3257	22.3568	14.45	8.49645	18.8309
1952	8.37806	12.2007	15.64	23.4877	28.0471	27.7473	25.4703	24.1735	23.3073	19.0855	12.0607	8.94548	19.0542
1953	8.48065	12.2661	17.8952	22.2217	26.5977	28.0993	26.2158	24.521	23.4207	17.6239	11.906	10.0903	19.1426
1954	7.00452	12.1804	16.0494	22.025	27.2426	28.0707	25.8523	24.9203	23.937	17.0116	13.0117	8.07161	18.803
1955	8.82387	10.5443	17.6603	19.254	25.6558	27.5483	25.8365	24.7523	23.559	18.1729	10.4413	8.37226	18.4296
1956	7.6329	9.11793	16.0348	21.6	27.5481	27.3443	24.5087	23.5806	23.3243	18.3568	10.6327	9.16032	18.2594
1957	8.04968	7.90607	14.9903	21.004	24.7368	26.8687	25.4387	24.6819	22.4507	18.6577	14.3207	9.28258	18.2511
1958	9.59258	10.1714	16.7342	23.714	26.5103	27.8473	25.5745	25.4897	23.5453	19.1919	13.057	10.3861	19.3632
1959	8.13871	9.91607	16.7874	21.8127	25.9442	27.6263	25.259	24.3765	23.63	20.3797	12.67	8.5529	18.8011
1960	7.13419	10.9307	14.9442	20.2187	25.2197	27.302	25.8958	24.5758	23.9377	18.7445	11.2377	9.36806	18.3066
1961	8.08097	9.22893	16.9281	20.9143	26.5487	26.7277	25.6652	25.031	23.872	18.2906	12.551	6.23355	18.3849
1962	5.07194	10.5786	15.0897	21.8237	25.6655	26.949	25.2494	24.0955	22.732	16.1094	11.736	9.37129	17.9004
1963	6.25742	11.5014	15.5145	21.4233	25.33	27.3423	25.7523	24.8719	23.0763	20.0781	15.5553	8.86032	18.8235
1964	5.94516	9.73483	17.2097	23.4223	24.7668	26.5743	25.0694	24.6671	23.3597	18.1913	10.811	8.12677	18.171
1965	9.98742	10.1018	14.619	20.3943	25.1274	27.018	25.2032	24.0539	22.6413	20.0906	13.491	7.47613	18.3904
1966	7.98452	12.5357	14.6965	21.1577	24.9652	26.655	25.4794	23.6129	22.1033	19.1597	13.702	6.60258	18.2385
1967	4.80065	11.3568	14.3748	20.42	24.5039	26.4993	25.4884	23.8729	22.3963	18.0374	13.783	11.56	18.1171
1968	7.10935	9.16759	15.1555	21.0137	24.4261	28.186	25.4958	23.7823	24.0657	18.3642	12.2183	8.45387	18.1333
1969	7.06419	9.62857	17.1358	21.537	25.4939	28.5683	26.1042	24.3758	23.5803	19.05	14.7807	8.09258	18.823
1970	8.44161	10.2868	15.7074	22.487	27.9226	27.48	25.6803	24.6435	23.4737	19.0771	10.2057	7.05968	18.5806
1971	6.08161	9.30393	14.2135	22.7827	24.999	26.1107	24.3352	23.7974	22.459	18.4771	11.5903	7.30581	17.6556
1972	7.06903	7.02414	15.4013	20.4937	25.0568	25.794	25.0626	24.0106	20.9973	16.8587	11.4237	8.00355	17.2959
1973	6.70581	11.4471	15.3132	22.5373	26.8677	27.3553	25.5503	24.279	23.5853	17.85	10.757	6.96677	18.2934
1974	5.79645	7.43893	15.7765	21.6683	24.9858	25.767	25.3013	24.3784	23.269	18.3413	10.1177	6.92903	17.5335
1975	5.58129	7.96893	13.3216	20.5593	26.5558	25.697	24.7468	24.3384	23.0957	19.0461	10.0587	7.45806	17.419
1976	8.64581	10.3438	15.1148	20.874	25.8513	26.049	25.5284	23.9735	22.1043	18.8297	15.9103	8.49839	18.4913
1977	7.02419	10.6414	15.8758	22.0437	25.0961	26.01	24.6777	23.881	22.5547	19.1284	15.025	8.64839	18.4144
1978	6.21806	9.20429	14.5648	21.4737	26.8881	26.6947	23.9874	23.7029	22.0343	17.8055	13.6053	7.90645	17.8773
1979	7.50774	9.82714	14.1981	21.0407	23.5474	27.4787	26.1077	24.2413	22.7153	19.6732	16.4417	10.09	18.6076
1980	7.17516	10.6103	15.6074	22.5047	27.0168	27.5273	25.5442	25.1061	23.8157	19.8242	13.1687	8.37194	18.8694
1981	7.96806	10.5786	15.8206	22.0483	26.2639	28.1273	25.3352	24.3026	24.0467	19.3142	12.027	7.83097	18.6728
1982	8.40742	9.54357	13.4497	20.1313	22.9158	26.3203	25.4816	23.8829	22.6013	19.3906	13.5383	8.84065	17.9134
1983	6.46323	8.545	14.3942	18.942	24.2577	26.1957	24.9223	24.0084	23.6087	17.8223	9.14367	8.05226	17.2424
1984	6.5871	7.30828	16.2961	22.014	26.9894	27.7747	25.4616	24.5029	22.5447	17.2013	11.5257	8.08839	18.0509
1985	7.67774	8.81	16.97	22.5937	27.0629	27.6837	25.7645	24.3848	23.5493	17.7923	12.985	9.86355	18.811
1986	7.60484	10.0132	15.6023	22.212	25.3429	27.3803	25.3187	23.7419	23.061	19.1435	13.5563	6.24968	18.3008
1987	7.73677	10.6825	16.3919	21.1423	24.0426	27.2167	26.5368	25.6581	24.458	20.0994	11.9563	7.96258	18.6947
1988	8.9029	11.8714	15.9865	23.284	28.4061	28.1237	25.8319	24.6487	24.5597	19.3006	12.1343	8.79387	19.3314
1989	6.22742	9.34607	15.4223	20.2133	26.099	26.9743	25.4348	24.4242	23.4333	18.879	14.014	8.8729	18.3202
1990	9.27065	11.3089	14.5494	22.0143	26.8823	27.23	25.1165	24.5132	23.488	18.4355	13.184	8.73484	18.7581
1991	7.45968	11.2693	16.8074	21.228	26.8074	28.419	26.609	24.6439	23.0977	17.71	12.8507	9.47968	18.8998
1992	8.09258	9.92345	16.2226	20.9383	25.8035	28.443	25.6139	24.2729	21.7627	18.7571	12.582	9.56323	18.5182
1993	8.67484	11.3061	15.0535	21.616	27.0287	27.1607	25.3245	24.8965	23.6207	20.3752	14.0837	8.35581	18.9917
1994	9.6171	9.93607	16.7819	20.66	26.6477	27.229	24.1365	23.3281	21.692	17.0929	12.539	8.70129	18.2391
1995	7.41968	11.3918	15.3574	21.6837	26.5023	29.19	26.071	24.7848	23.8997	20.7371	13.003	10.0184	19.2051
1996	8.13581	10.6945	18.111	21.5147	25.6761	27.1897	25.7316	24.0906	23.5403	19.2923	12.1323	7.48581	18.6494
1997	6.90452	9.9075	16.6645	20.5407	23.8661	25.5577	26.2248	24.4135	23.719	18.2932	14.488	8.74194	18.3149
1998	7.90161	11.1568	15.4952	22.6007	26.7058	27.305	25.3661	25.0361	23.9487	19.9123	14.252	8.77452	19.0699
1999	7.70871	11.8668	15.9394	22.3567	26.6455	26.304	25.5455	24.1135	24.0193	19.2555	13.791	7.99355	18.821
2000	8.42935	9.49241	15.3235	23.4787	27.2923	27.69	25.4848	25.3919	24.206	20.5655	14.6943	8.9429	19.2669
2001	7.20968	11.0389	16.4374	21.5013	26.9868	26.46	25.0197	24.5129	23.637	20.3116	13.294	9.27258	18.8442
2002	7.98387	10.3946	17.5294	23.5077	28.2519	28.4597	26.89	25.5484	23.7283	20.4971	14.82	10.1342	19.8586
2003	7.63839	11.4807	16.3103	23.049	26.0135	27.562	24.8303	24.7194	23.537	18.3061	13.0417	8.69548	18.792
2004	7.88903	10.7193	17.9565	24.5163	26.3352	26.7617	25.9842	23.8832	23.963	18.7784	13.368	9.54806	19.155
2005	6.96161	10.0311	16.9339	19.4927	25.3577	26.594	24.2906	24.1955	23.7043	18.2432	13.0457	6.88355	18.0132
2006	8.10903	13.9	15.941	22.644	27.3558	25.938	24.9994	23.6035	23.7317	20.6848	15.2313	10.2084	19.3795
2007	8.5271	13.5943	16.7448	24.0527	27.5016	28.024	25.8094	24.9558	24.4577	18.3819	14.3443	9.34194	19.6607
2008	7.45387	8.38621	18.1423	21.727	25.8694	26.2317	25.8561	24.1123	23.393	20.8542	14.1393	12.3377	19.0747
2009	10.6335	12.8232	18.0248	22.779	28.0042	27.829	26.4971	25.8358	24.4513	20.5768	14.329	11.3519	20.2996
2010	8.66613	12.1439	19.8313	25.6833	29.0777	27.9177	26.3874	25.1487	23.344	21.0606	15.759	8.74032	20.3491
2011	7.46968	12.2989	17.4245	22.0537	27.9874	28.1527	25.9961	25.2013	23.6387	19.3977	15.743	9.5571	19.6056
2012	7.35516	9.63586	16.1519	22.598	26.3826	28.3687	27.3126	24.7835	23.7143	19.0529	13.0987	9.73548	19.0351
2013	7.52355	11.9725	16.9677	22.4913	27.4287	28.135	25.9929	24.6755	24.277	20.7139	13.2723	9.62935	19.4558
2014	8.24915	10.8334	16.0249	22.0057	25.6546	28.8536	26.7555	25.1431	23.5303	20.6024	14.5009	8.72336	19.2762
2015	8.5415	12.7858	16.6572	22.8828	27.0707	26.9882	25.4269	25.0797	24.2141	20.7954	15.423	8.92021	19.5904
2016	9.82612	11.5783	18.2914	23.7294	27.984	28.7574	26.0623	24.6037	23.9673	20.9334	12.8776	10.7776	19.9687
2017	9.00594	11.7947	16.699	23.7481	27.4457	27.2218	25.9144	24.9109	24.1786	20.0466	13.496	9.8863	19.5637
2018	7.98071	12.5419	17.7566	23.5909	27.4743	27.9904	25.8154	24.8119	22.6148	19.0909	13.5549	7.90935	19.2869
2019	8.19793	10.8175	15.9101	24.0669	27.0237	29.3068	26.5103	24.9094	25.2144	19.7943	16.4713	8.5058	19.7564
2020	8.4995	10.9519	16.2966	22.6225	26.5317	27.6467	26.9077	25.5787	24.9473	19.9235	12.4634	9.34733	19.3269
2021	8.42941	11.9873	18.3068	21.8646	25.4593	26.6703	26.6765	24.7834	24.3273	20.1714	12.7502	9.64406	19.2921
MEAN	7.71422	10.541	16.1288	21.9418	26.2495	27.3183	25.6348	24.5129	23.4478	19.1472	13.1581	8.778
STDEV	1.11814	1.46101	1.24224	1.29043	1.24699	0.866813	0.668568	0.548465	0.783946	1.18615	1.59311	1.17966
CV	14.4945	13.8602	7.70201	5.88114	4.75053	3.17301	2.60805	2.23745	3.34336	6.19491	12.1074	13.4388

## Sheet: Banaswar
Row Labels	Jan	Feb	Mar	Apr	May	Jun	Jul	Aug	Sep	Oct	Nov	Dec	Banaswara Min Temp (1951-2021)
1951	8.44129	10.4425	17.1129	20.8253	25.2881	25.5567	24.1894	22.8768	22.5417	21.6365	15.263	9.91065	18.7154
1952	10.2123	13.7852	16.2313	23.4613	26.7755	25.3987	23.48	22.4435	21.7953	19.1039	12.362	11.721	18.9051
1953	10.5116	14.0275	18.5832	22.687	25.4935	25.6257	23.9971	22.9203	21.9493	17.4948	12.6457	11.0097	18.9324
1954	8.87323	13.5457	16.8052	22.3677	26.0084	25.49	23.6365	23.0294	21.9023	16.7984	13.126	9.93419	18.4753
1955	10.7639	12.5696	18.4165	19.7103	25.0981	24.9467	23.6213	22.9516	22.2323	18.5348	11.433	10.0052	18.3911
1956	9.9629	10.9186	17.2019	21.8887	25.7355	24.853	22.5742	22.0616	21.7563	18.3329	12.7693	10.7974	18.255
1957	9.83226	9.48643	15.6974	21.6	24.5216	25.0327	23.509	22.8952	21.3187	18.5629	16.1207	11.9768	18.4236
1958	11.4994	11.8182	17.3848	23.7073	26.1781	25.787	23.7081	23.4368	22.1083	19.1381	14.3647	11.9681	19.2949
1959	10.4316	11.7621	17.1881	22.4047	25.6342	25.2013	23.2713	22.7397	22.2017	19.98	14.1033	10.8355	18.847
1960	9.36323	12.539	15.9261	20.9157	24.4113	25.121	23.8648	22.5803	22.2903	18.1594	12.4917	11.8161	18.3004
1961	10.2058	10.6575	17.5887	21.5673	25.7774	24.3943	23.5052	23.1745	22.1547	18.0768	14.709	8.75581	18.4186
1962	7.14194	11.9336	15.9303	21.7307	25.1335	24.8663	23.2806	22.3016	21.3883	15.7684	13.57	11.7958	17.9253
1963	9.25226	13.3471	16.7758	21.5507	24.6997	24.8407	23.4474	22.7377	21.281	19.1535	16.3157	11.2374	18.7391
1964	7.9971	11.2803	17.5916	23.2637	24.2877	24.795	23.0368	22.8523	22.11	18.7177	12.6087	9.85355	18.2101
1965	12.0577	11.9289	15.7665	21.648	24.6126	25.5493	23.4629	22.5716	21.447	19.5081	14.6633	11.0094	18.7175
1966	10.7494	13.6868	15.5668	21.3533	24.1371	24.8663	23.7061	22.3816	20.7987	18.9494	16.172	9.51839	18.5047
1967	7.57258	12.7439	15.6568	20.8433	24.3181	24.3843	23.2303	22.0952	21.024	18.1006	14.5263	14.1265	18.2418
1968	9.4029	11.0403	16.3668	21.371	23.6561	25.649	23.4165	21.841	22.2903	18.2542	13.1617	10.4084	18.0821
1969	9.72419	12.3961	18.8348	22.3107	25.9216	25.7547	23.7481	22.4268	21.7373	17.8174	16.331	10.9274	19.0206
1970	10.2026	12.2493	16.1977	22.8293	26.5313	24.24	23.2535	22.91	21.706	18.6816	11.506	8.46194	18.2598
1971	8.58065	10.8157	15.6258	22.6483	24.8071	23.9903	22.7468	22.16	21.676	18.4752	12.2937	8.52806	17.7253
1972	9.21387	9.32	16.7877	20.7897	24.4971	24.4797	23.071	22.2945	19.8207	17.6474	12.3753	10.07	17.5554
1973	8.55387	12.5468	16.699	22.798	25.5871	24.9263	22.8829	22.2823	21.511	18.3735	12.653	10.9803	18.34
1974	8.59452	10.24	17.5887	22.4793	24.5016	24.8967	23.7339	22.8765	22.3187	19.4758	11.342	9.49065	18.1697
1975	7.86935	11.1389	14.8148	21.7263	25.9026	24.755	23.4871	22.9381	21.9743	19.7055	11.0897	8.53226	17.8602
1976	10.0745	11.6766	16.4432	20.6893	24.231	23.9137	23.1303	22.0503	20.9047	18.1968	17.5843	12.1281	18.4297
1977	9.47742	12.9443	18.0313	22.6923	24.8213	24.7423	23.3955	22.7303	21.3137	18.9855	16.4267	11.2897	18.927
1978	8.53839	12.2696	15.9235	22.2567	25.569	24.9397	23.0084	22.4023	21.6083	18.1471	15.5627	10.5135	18.4157
1979	10.9384	11.03	15.5461	21.069	23.6168	25.6017	23.6445	22.0497	21.7673	19.6268	17.0847	12.081	18.7044
1980	10.6761	11.8645	16.8132	23.2833	26.0077	24.1417	23.64	22.5845	22.2217	19.4413	15.9847	10.4981	18.9413
1981	9.45645	11.9764	16.8552	22.2807	25.1042	26.1103	23.3903	22.459	22.6287	19.1174	12.342	10.4035	18.5385
1982	11.6261	12.6029	15.2039	21.0667	23.571	25.4283	23.9919	22.5561	21.594	19.5623	15.9503	11.4429	18.7415
1983	8.74548	10.4907	15.3339	20.0263	24.5632	24.8133	23.2116	22.6913	22.343	17.8287	10.2417	9.35548	17.5071
1984	9.35581	9.59655	16.8023	22.4117	25.4113	25.0973	22.8765	22.0413	21.036	17.5413	12.7087	9.88065	17.9155
1985	9.79613	9.94036	17.4674	21.9153	25.1065	25.5103	23.2894	22.0087	21.7633	17.7561	13.4187	11.2865	18.3139
1986	9.88871	12.4882	16.4735	22.3173	24.4919	25.2503	23.1958	21.9416	21.507	18.7248	14.3643	9.20516	18.3408
1987	10.2994	12.4257	17.5142	22.0177	24.8339	25.516	24.7387	23.5245	22.733	19.63	14.081	10.9023	19.0495
1988	11.0497	13.4293	16.9665	23.274	26.3929	25.6257	23.5594	23.0481	23.232	18.4897	12.8797	10.1868	19.0171
1989	8.19742	11.335	16.581	20.924	24.9781	24.8137	23.3297	22.4661	21.692	17.6719	14.6887	10.2274	18.1039
1990	10.6355	12.2729	14.7677	21.3337	25.3477	24.4637	22.9135	22.5535	21.6087	18.7874	14.1157	10.7006	18.3183
1991	8.59935	12.2775	17.2713	21.7613	25.7477	26.3107	24.0819	23.0752	21.746	17.1448	14.489	10.1597	18.5793
1992	9.40065	10.6562	16.41	21.1247	24.8919	26.2607	24.1274	22.9545	20.543	18.7865	13.4217	10.8387	18.3039
1993	10.2265	11.6229	15.9994	21.8217	25.6368	25.5073	23.4587	22.8661	22.4633	20.2371	14.5147	10.1184	18.7383
1994	11.7484	10.8043	17.1826	21.2683	25.619	24.93	22.9313	22.2829	20.8267	17.3226	13.4943	9.29548	18.1807
1995	8.60935	11.5743	16.1145	20.7507	24.4939	26.2373	23.7387	23.0229	21.8733	19.95	13.289	11.391	18.4535
1996	10.1629	12.2017	19.2752	21.1857	24.9539	25.3063	23.8165	22.1197	21.4713	18.52	12.7877	9.56452	18.4622
1997	9.04935	10.9386	17.3406	20.5417	23.7777	23.9253	24.2684	22.8965	22.319	18.5758	16.2203	11.2994	18.4655
1998	9.9571	11.4846	16.1926	22.5127	25.7503	25.7887	23.7439	23.3477	22.5327	20.2835	14.4423	8.88903	18.7752
1999	8.28129	13.2821	15.7368	21.0753	24.9397	24.3883	23.2148	22.0548	21.9277	18.501	13.3387	8.44742	17.9459
2000	8.97129	10.1179	14.8871	22.174	24.1987	24.7773	22.8329	23.12	21.8467	19.1006	14.5313	9.22129	17.9934
2001	8.96871	11.9171	17.3071	21.679	25.5652	24.5157	22.9326	22.7174	22.3077	20.0677	13.9787	10.8035	18.5955
2002	9.25935	12.0086	17.7442	22.9553	26.3548	25.488	24.0781	22.5532	20.9593	18.5819	14.0533	11.3048	18.8112
2003	10.3381	13.5268	16.6794	22.9377	25.1461	25.1257	23.6297	22.7935	21.467	17.3794	15.6547	11.1197	18.8328
2004	10.2532	11.6393	17.9616	23.8063	25.5455	25.41	23.9826	22.4597	22.5873	18.6197	15.2643	11.5997	19.1056
2005	8.72129	11.5318	17.87	20.4697	25.2252	25.8367	23.8106	22.4871	22.589	17.9529	13.126	8.97452	18.2461
2006	9.72097	14.3643	16.6787	22.1597	25.6603	24.7377	23.1342	21.9048	22.0233	19.1129	14.5937	11.7594	18.8349
2007	10.6823	14.5071	17.1577	23.359	26.0858	25.6987	23.8881	23.2403	22.8337	17.3523	14.2933	11.0477	19.1913
2008	8.82032	8.7931	17.4348	21.4183	24.6768	24.678	23.6461	22.5119	21.8057	19.451	14.1523	13.4584	18.4334
2009	11.9113	13.4321	18.2268	22.1423	25.5003	25.4577	23.6306	23.2477	22.4323	18.4319	14.8003	12.6045	19.3458
2010	9.73774	13.1346	18.9239	23.6377	26.7435	25.867	24.051	22.7503	21.5713	19.9703	17.414	10.0068	19.5073
2011	7.82387	12.2954	16.7997	21.7213	25.2784	24.9387	23.0968	22.4777	21.4283	18.7216	15.6743	11.0584	18.466
2012	8.56645	10.6797	15.6958	23.0623	24.8529	25.4867	23.9	22.5965	21.7813	18.4458	13.1227	11.3406	18.3078
2013	8.55194	12.5396	16.6839	21.8913	25.5874	24.2363	22.9197	22.3474	22.3397	19.511	14.0197	10.7374	18.4718
2014	10.2568	12.0527	16.3115	21.7214	24.6118	25.6333	23.9696	23.1205	22.0485	20.0201	16.4207	10.1066	18.8835
2015	9.40768	13.0625	16.742	22.0834	25.9246	24.6022	23.6892	22.8416	22.2606	20.0684	16.2838	10.0894	18.9433
2016	10.4675	12.6911	18.1911	22.7606	25.8841	26.0247	23.758	22.749	22.3498	19.6929	12.6203	10.5773	18.9935
2017	9.96078	12.7754	16.9323	22.0659	25.6526	25.0773	23.1025	22.8893	22.3018	19.3602	13.6143	11.212	18.7723
2018	9.70395	13.0574	17.5738	22.636	26.2731	25.6795	23.2608	22.9217	21.2647	19.0282	14.5321	9.22475	18.7851
2019	8.11792	11.4045	15.7803	22.4057	25.2161	26.1138	24.0371	22.8745	22.7488	19.4682	16.8631	11.0817	18.8688
2020	9.4938	11.7525	15.6918	21.8721	25.5024	24.1573	23.8808	23.016	22.714	19.6865	13.003	10.4026	18.4457
2021	10.0812	11.6496	17.0197	21.5884	24.5604	24.5618	24.1483	22.573	22.5348	19.603	13.9524	11.2016	18.6578
MEAN	9.60024	11.9203	16.7729	21.9525	25.2031	25.1286	23.5202	22.6437	21.8759	18.7733	14.1323	10.6015	18.5348
STDEV	1.06691	1.21512	0.997089	0.89955	0.746746	0.6005	0.427377	0.393958	0.604573	0.967393	1.61015	1.13237	0.409125
CV	11.1134	10.1938	5.94463	4.09772	2.96292	2.38971	1.81706	1.73982	2.76365	5.15304	11.3934	10.6812	2.20733

## Sheet: Bharathpur
Row Labels	Jan	Feb	Mar	Apr	May	Jun	Jul	Aug	Sep	Oct	Nov	Dec	Bharathpur Min Temp (1951-2021)
1951	6.45935	8.62893	14.6681	19.2177	25.5616	28.2027	27.9626	26.1923	24.3457	21.309	13.3157	7.10903	18.6334
1952	7.80742	11.6197	14.7535	22.5123	26.9339	27.8893	26.92	25.7168	24.1757	18.1716	10.8453	7.73903	18.7677
1953	7.13032	11.1875	17.6732	21.666	27.6116	29.4503	27.0381	25.8445	24.296	17.8284	10.606	9.17161	19.1645
1954	6.98161	12.1907	15.1132	21.5967	27.2919	29.103	27.3219	26.2284	25.2683	16.4781	11.59	6.88484	18.8586
1955	7.85935	9.4825	16.4174	18.7043	25.0284	28.9087	27.2423	25.71	24.702	18.5748	10.738	7.55516	18.4578
1956	7.11419	8.76	15.5787	21.613	27.8474	28.042	26.1523	25.5332	24.5827	19.2648	10.6367	8.34194	18.6478
1957	8.23452	7.73821	14.2597	20.0487	25.0497	27.8693	27.1226	26.0752	23.448	18.1923	12.6213	9.05	18.3665
1958	8.8171	9.66143	15.8013	22.836	25.8581	29.2657	27.0674	25.9548	24.9243	19.5871	12.427	9.77871	19.3778
1959	8.18097	9.53321	15.1642	20.6783	25.5394	29.331	26.7968	25.9448	24.9673	20.15	12.489	7.97677	18.9404
1960	6.52613	10.9172	14.8458	19.6763	25.7755	29.1403	26.9635	25.9442	24.5127	18.4987	10.9737	8.45452	18.5327
1961	8.08097	9.14393	15.0584	20.7937	25.7819	28.4813	26.9658	25.8923	25.1153	18.9477	11.8803	5.44677	18.5083
1962	5.41548	10.8914	14.7639	21.7273	25.5197	28.9373	27.3384	25.9803	24.244	16.5945	11.7997	8.02	18.4625
1963	5.10839	10.1782	14.3965	20.613	24.6568	28.3083	27.2542	25.8416	23.677	19.4794	14.8193	7.58645	18.5248
1964	5.54387	9.05379	15.7106	22.0993	23.6016	28.0293	25.8371	25.7984	23.7647	18.1835	10.2013	7.88419	17.9911
1965	8.26581	9.11571	13.4745	19.3707	24.6048	29.2677	26.6887	25.3429	23.4293	18.8806	12.3297	6.20548	18.1219
1966	6.5329	11.8343	14.2645	20.6397	25.1658	27.0403	27.1668	25.4055	23.2913	18.1603	12.2743	5.74194	18.1488
1967	4.90871	10.3704	12.9329	19.844	24.7519	28.6463	26.6003	25.3097	23.9807	17.801	12.0513	10.0681	18.1359
1968	7.18871	8.36586	14.1797	19.704	24.7923	28.4677	26.0971	25.311	24.3483	17.6971	11.0987	7.15581	17.8859
1969	5.89613	8.94	15.5639	20.925	24.56	29.1793	26.2574	25.5629	23.994	18.8365	12.9323	6.33677	18.2867
1970	6.79774	8.55214	13.6594	20.245	25.5687	26.9517	26.99	25.6835	24.462	19.041	10.968	6.6429	18.0113
1971	5.0829	9.01929	13.5913	21.3967	24.5416	26.8843	25.6219	25.0261	23.1563	18.7797	11.838	7.32774	17.7258
1972	6.40484	7.33483	14.4097	19.6343	25.6884	29.0663	27.6897	25.2735	22.135	17.5703	12.3193	8.62548	18.0407
1973	6.88935	10.5339	13.6197	21.6167	26.0974	29.094	26.8687	25.2626	24.5867	18.6729	10.799	6.44258	18.4035
1974	5.56323	7.28357	15.38	22.0007	25.599	27.5163	26.0774	25.63	24.0367	18.8974	10.367	7.04935	18.0045
1975	6.61032	8.2275	13.5923	20.7893	26.5716	27.1203	25.8981	25.4884	24.4513	19.9771	9.572	6.69258	17.9674
1976	8.08516	10.6048	14.3313	19.973	24.7658	26.1127	26.6365	25.1003	23.7477	18.5384	13.723	6.81806	18.2152
1977	6.2071	8.4175	13.9545	20.6127	23.8503	26.6917	25.7039	25.5987	23.8037	19.3481	14.305	8.62129	18.1367
1978	6.12355	8.39964	13.1803	20.112	27.4958	28.1493	25.7703	25.5571	23.8903	17.6058	12.8533	7.3729	18.0866
1979	8.03097	9.46286	13.1377	20.509	23.3603	26.93	26.8597	25.5832	23.0073	18.9494	15.4417	8.92903	18.3889
1980	6.45097	11.0459	14.3642	22.08	26.9148	27.515	25.6274	25.1052	23.332	19.1581	12.4923	8.30452	18.5426
1981	7.97419	10.1229	14.6835	20.8997	25.8326	28.1043	25.9603	25.3423	24.117	17.6335	12.325	6.7329	18.3445
1982	8.01129	9.6125	13.241	20.1323	23.2245	26.8847	27.6294	25.659	23.3183	19.4774	13.6637	8.15484	18.2916
1983	6.56484	8.92679	14.3942	18.8867	24.291	26.3097	26.45	25.9165	25.1163	18.6974	10.4967	7.67581	17.8573
1984	6.16194	7.60241	15.2571	20.8197	26.8977	28.784	26.0332	25.3084	23.0047	16.6823	10.86	7.39742	17.9246
1985	6.94742	7.92643	15.4335	21.2443	25.9429	28.17	25.7871	25.6471	23.8557	18.0052	11.8633	9.72613	18.4332
1986	6.35484	9.46464	14.5729	20.3903	23.7316	27.307	25.7526	25.441	23.5353	18.6271	12.841	6.40516	17.9032
1987	7.26387	10.6011	15.5458	20.5277	23.2158	27.941	28.0587	27.0545	24.6087	19.321	11.1013	7.00161	18.5575
1988	7.33065	10.4048	14.669	22.0643	28.0168	27.2533	26.4081	25.4129	24.952	17.9845	12.505	8.79484	18.8309
1989	6.00871	8.41714	13.8965	18.577	25.221	27.1483	26.62	25.4526	23.6597	17.4329	11.7433	7.2071	17.6617
1990	8.12677	10.8621	14.0152	20.3523	26.0952	28.1937	26.1158	25.8448	24.68	18.1194	12.5407	8.25452	18.6325
1991	6.49032	10.8632	15.4358	20.5213	26.03	28.5893	28.7961	26.0819	24.506	17.8177	12.6403	9.31677	18.9614
1992	7.96645	9.4169	15.0287	20.518	24.7845	28.4377	26.359	25.4348	23.2183	18.3777	12.4237	8.72677	18.4099
1993	7.84032	11.3068	14.0271	20.4087	26.5871	27.8283	26.5274	26.721	24.4897	18.3871	12.966	7.76548	18.7696
1994	8.72742	9.35964	15.3494	19.8373	25.689	27.8897	25.4803	25.6026	23.6657	17.7106	12.969	8.89161	18.4764
1995	6.82226	10.2279	14.4232	20.6867	26.0613	28.9743	26.9713	25.5303	24.4193	20.0713	12.3883	8.94581	18.833
1996	7.59226	10.1907	16.4281	20.4847	25.0006	26.9733	26.3784	25.3426	23.9933	18.9145	11.192	6.11161	18.234
1997	5.77194	9.16393	15.2006	19.7797	23.3277	26.071	27.0361	25.3161	24.579	17.9439	13.21	8.58226	18.0392
1998	6.56452	10.4211	13.7458	21.747	26.4881	27.824	26.6184	26.1665	25.4743	20.6848	14.0047	8.14935	19.0253
1999	7.08548	10.0057	14.4623	21.099	25.8397	26.6747	27.0765	25.9726	24.9063	19.4594	12.6417	7.48452	18.5989
2000	7.5629	8.65103	13.8216	21.3427	26.8177	27.0687	26.1635	25.8758	24.0997	19.6594	13.9187	7.46968	18.5581
2001	6.24032	9.5475	14.3077	20.7557	26.5665	26.488	26.9816	26.1681	24.3303	19.7155	12.2233	8.38903	18.5224
2002	7.36129	9.97679	15.2532	22.192	27.1742	28.3383	29.6784	26.6865	23.8463	19.7023	13.2153	9.30097	19.4438
2003	6.26968	11.2725	15.43	22.1687	25.7752	29.1813	26.6381	26.451	24.9717	18.3477	12.1423	9.43161	19.0361
2004	7.70677	10.15	17.1555	23.6743	26.3745	26.9137	27.6784	25.9219	24.7337	19.0948	12.4543	9.00323	19.2585
2005	7.20839	10.5579	16.9706	20.0123	24.7903	27.7667	25.9442	26.469	24.968	18.3455	11.8693	5.96677	18.4401
2006	7.01065	13.6575	15.4177	21.7597	26.5816	26.4547	26.8239	25.7558	24.171	19.9816	13.6783	9.11194	19.2205
2007	6.79097	11.9882	14.95	22.8027	25.9484	27.9307	26.7781	26.2187	24.6783	17.5387	12.8187	8.14355	18.9041
2008	6.63484	8.17586	16.9371	21.444	25.2803	26.1287	26.5223	25.9045	24.2837	20.3852	13.3483	10.919	18.8615
2009	9.45677	11.265	15.9739	21.788	26.4026	28.5437	27.7429	27.0919	24.98	19.11	13.6003	9.37452	19.6507
2010	7.57839	11.3925	17.9213	24.3887	27.6545	28.009	26.2658	26.421	24.5497	20.3968	15.1223	7.87839	19.832
2011	6.26129	10.8943	15.6858	20.7547	26.7274	27.4173	26.8935	26.3074	24.9563	19.0574	14.3193	8.14903	18.9863
2012	7.24935	9.24172	14.8387	21.6437	25.8797	29.9257	28.1319	25.9558	24.6267	18.4506	12.156	8.45032	18.8968
2013	6.04323	10.8518	15.4552	20.9337	26.2229	27.7393	26.8342	25.7097	24.9237	20.2713	11.853	8.86839	18.8463
2014	7.68426	9.69848	14.586	19.924	24.5918	28.2229	27.4752	26.5435	24.653	20.0068	13.0251	8.14359	18.7569
2015	7.76771	11.9623	15.0697	20.7788	25.7305	26.5924	26.3825	26.3133	25.0468	20.3036	14.6055	8.5651	19.1226
2016	8.51944	10.9374	16.7545	22.6537	26.0762	28.5301	26.9344	26.1518	25.1071	20.2894	12.5221	9.43511	19.5097
2017	8.13944	10.7067	15.0037	22.4993	25.9116	26.9218	27.0033	26.4467	24.997	19.4292	12.3111	8.87806	19.0598
2018	6.58007	10.9861	15.7812	21.5489	25.6343	28.762	26.8574	25.9969	23.5577	17.9971	12.6015	6.68393	18.6114
2019	6.67084	10.1275	13.5101	21.5315	24.7966	28.0676	26.8776	25.9444	25.2506	18.7155	14.4955	7.13995	18.6225
2020	7.65382	9.6117	14.558	20.1033	24.6154	27.2534	27.2867	26.2832	25.6095	17.8607	10.957	7.79005	18.3167
2021	7.4516	10.9174	16.4591	19.3264	23.4871	26.7409	27.43	26.1475	24.9424	19.7324	11.6545	8.49757	18.6054
MEAN	7.03867	9.91495	14.9224	20.9329	25.6014	27.8866	26.7876	25.8438	24.2966	18.8016	12.3884	7.97532
STDEV	0.952836	1.2749	1.08054	1.12679	1.15809	0.949888	0.752189	0.450058	0.684196	1.00497	1.23875	1.12065
CV	13.5372	12.8584	7.24108	5.38286	4.52353	3.40626	2.80797	1.74146	2.81602	5.34515	9.99932	14.0515

## Sheet: Bikaner
Row Labels	Jan	Feb	Mar	Apr	May	Jun	Jul	Aug	Sep	Oct	Nov	Dec	Bikaner Min Temp (1951-2021)
1951	4.78065	6.77536	13.7739	18.388	24.8642	27.1037	27.8077	25.5661	23.9463	21.1061	12.8707	6.77194	17.8733
1952	6.59065	10.3841	14.1665	21.976	26.5484	27.7057	26.5781	25.28	23.6943	17.9342	10.7153	6.55613	18.1889
1953	6.35935	10.5675	16.83	20.9703	26.0803	28.316	27.1574	25.2739	23.7423	17.0377	10.5233	8.76032	18.5066
1954	5.39323	10.8993	14.7274	20.6497	26.3519	28.0877	26.9332	26.0865	24.707	16.2677	11.7047	6.16581	18.19
1955	6.74935	9.34393	16.7345	18.2877	23.9268	28.2543	27.249	25.4861	23.7757	17.3877	9.71733	6.75097	17.8507
1956	5.83323	7.91207	14.9132	20.572	26.9113	27.878	25.5797	24.5158	23.888	18.0519	9.41767	7.53194	17.7748
1957	6.83226	6.685	13.8158	19.4887	23.5165	26.9873	26.4871	25.7439	22.5347	17.8748	12.321	7.66	17.5533
1958	7.78065	8.74071	15.5887	22.794	25.1784	28.0873	26.7019	26.3068	23.9007	18.6113	11.5547	8.69677	18.7113
1959	6.27129	8.5275	15.3087	20.4923	24.8668	28.3863	26.3994	25.521	24.1827	19.9906	11.8057	6.73581	18.2539
1960	5.45806	9.7369	13.819	19.1033	24.4868	27.7123	26.7332	25.6694	24.221	18.0668	9.88933	6.73871	17.651
1961	6.60548	7.80536	15.3416	19.7333	25.2213	27.143	26.7697	25.6906	24.4667	17.6932	10.6417	4.90935	17.7185
1962	4.14677	9.90786	14.519	21.2887	24.9571	27.5557	26.4881	25.7555	23.3623	16.1413	10.915	6.88968	17.6901
1963	4.0829	9.72464	14.059	20.11	23.7919	27.8743	27.1094	25.829	23.2627	19.4845	14.2687	7.28968	18.1063
1964	4.23387	8.21069	16.0545	22.207	23.8577	26.7177	25.7897	25.4848	23.257	16.6755	8.94967	6.47032	17.3432
1965	8.10613	8.61964	13.3242	18.7517	23.6519	27.126	25.9474	24.6771	22.5903	19.2139	12.274	4.79129	17.4649
1966	5.88323	11.5439	13.8455	20.211	24.3242	27.0163	26.649	24.811	22.6563	18.4587	10.8217	4.57935	17.5876
1967	3.35161	10.1736	13.2052	19.7903	23.6997	27.138	26.6448	25.1784	23.0577	17.4477	12.189	9.02387	17.6033
1968	5.71968	7.85069	14.0219	19.597	23.6516	28.3537	26.3945	25.4468	24.2957	17.8306	11.37	6.88839	17.6358
1969	5.58355	8.54071	16.1826	20.4273	24.3639	28.792	27.3987	25.7784	24.0227	19.431	13.0683	6.83097	18.4139
1970	7.15903	9.05464	14.6474	21.0753	26.3045	27.3183	26.2271	25.121	23.6813	18.549	9.63333	5.82677	17.9278
1971	4.47065	8.75	13.9629	22.2753	25.0165	27.7143	26.0568	25.3116	22.804	18.1932	11.3947	6.65516	17.7543
1972	6.11677	6.15621	14.8574	19.9013	24.8448	26.5953	26.0839	24.8816	21.4343	16.4768	11.5103	7.61226	17.2373
1973	5.54516	10.4693	14.1139	21.2633	25.8087	28.3263	27.0297	25.5684	24.326	17.3168	9.888	5.23903	17.9357
1974	4.63484	6.21321	14.8555	20.86	24.6177	25.626	26.4429	25.7529	23.574	16.7797	9.28033	5.43323	17.0636
1975	4.66419	6.78893	12.6026	19.7673	25.5784	26.1077	25.6303	25.5739	23.5077	18.7539	9.574	6.67871	17.1582
1976	7.65677	9.91759	14.0313	19.6223	24.6571	25.6637	26.2597	24.5974	22.591	18.3006	12.695	6.35613	17.7115
1977	5.34	8.725	14.5326	20.7227	24.1719	26.2497	25.7816	25.2229	23.1837	18.8084	13.695	7.65581	17.8815
1978	5.33645	8.22143	13.6739	20.4883	26.9006	27.8487	25.1077	25.1258	22.7987	17.1139	12.0967	6.57677	17.6495
1979	6.45226	9.11036	13.1748	20.752	22.8894	28.0597	27.3797	25.7158	22.9833	18.9226	14.6163	8.68129	18.2661
1980	5.43194	9.38069	13.9516	21.4097	26.3061	28.1897	26.3881	25.9897	23.875	19.1468	12.073	7.49806	18.3184
1981	7.3229	10.1179	14.7929	20.6933	25.87	27.9357	26.2148	25.33	24.0813	18.04	11.95	6.49484	18.2716
1982	6.67387	8.30143	12.4287	19.101	22.4677	26.238	26.8816	25.089	22.8957	18.8177	12.602	7.27806	17.4419
1983	5.42355	8.19679	13.6906	18.1687	23.8045	26.4417	26.0497	25.4613	24.4067	17.8132	9.32533	6.51774	17.1544
1984	4.22968	6.26379	15.4577	20.9103	26.0916	28.3233	26.1161	25.6723	22.893	16.2726	10.5337	6.44903	17.4602
1985	6.02581	8.0675	16.4645	21.3183	25.9597	27.324	26.3306	25.6042	23.89	17.1784	11.863	8.3871	18.2526
1986	5.66677	8.6425	14.6074	20.6437	24.2574	27.3753	26.0142	24.8271	23.2263	18.601	12.5713	4.78097	17.6381
1987	6.67323	10.0814	15.5723	20.5557	23.2471	27.3563	27.7561	26.8274	24.8843	19.6616	10.91	6.34452	18.3617
1988	7.40097	10.4538	14.87	22.0253	27.1571	28.346	26.8668	25.6619	24.801	18.7271	11.8823	7.82516	18.8486
1989	5.5171	8.12821	14.3058	18.775	24.9419	27.1257	26.7277	25.861	24.1343	18.6494	13.1313	7.85355	17.9784
1990	8.43097	10.8257	14.0419	20.8557	26.5297	27.9123	26.3816	25.8413	24.46	17.8235	12.4637	7.54968	18.6258
1991	6.01387	9.5525	15.0639	19.7067	25.5055	27.708	28.0226	26.0329	23.54	17.2016	11.862	8.15742	18.2408
1992	7.06806	9.03241	14.5226	19.7753	24.4984	28.079	25.8006	24.8203	21.8207	17.6139	11.2073	8.2029	17.7233
1993	7.09935	10.5714	13.7768	20.674	26.2503	27.4243	25.9329	25.9955	23.8997	18.8797	13.0797	7.39097	18.4477
1994	7.88935	8.89107	15.5294	19.4663	25.63	27.657	25.6177	25.4439	22.962	17.3274	12.841	8.30387	18.1773
1995	6.39903	10.3568	14.2023	20.4693	25.9729	29.1237	27.2935	25.6226	24.1003	19.7613	11.9587	8.56774	18.6903
1996	6.84419	9.96862	16.9771	20.3947	24.4929	26.604	26.4374	25.0852	23.6317	18.15	10.3533	5.85323	17.917
1997	5.30677	8.87357	15.5377	19.5777	23.0694	25.8853	27.5168	25.5303	24.4843	17.9358	13.0597	7.85323	17.9285
1998	6.95065	10.5068	14.8587	21.9493	26.3661	27.6903	27.1113	26.8116	24.927	19.9687	12.988	7.63516	19.0181
1999	7.51742	11.0214	14.9494	21.3337	26.0932	27.1197	27.3197	25.6616	24.9477	19.2177	13.2847	7.26258	18.8434
2000	7.27161	8.63069	14.2532	22.491	27.5219	28.0867	26.5655	26.1916	24.188	19.6829	13.3927	7.64613	18.8474
2001	5.91903	9.81429	15.2313	20.7747	26.3835	26.6853	26.3348	25.61	23.335	20.1026	12.299	8.12645	18.4289
2002	6.62323	9.19857	16.0429	22.6467	27.3868	28.6513	28.191	26.8787	24.0513	19.9306	13.9253	9.02677	19.4309
2003	5.95	10.2457	15.1826	21.8033	24.7313	28.3023	25.5871	25.8335	24.1883	17.8261	11.3947	7.98387	18.2835
2004	7.43516	10.4245	16.9371	23.437	26.1468	26.872	27.9113	25.5039	24.7057	18.8023	12.9447	9.03452	19.1967
2005	6.51871	10.2104	16.6652	19.549	24.4203	27.5767	26.2984	25.9761	24.328	18.3471	12.4017	5.62065	18.1939
2006	6.74161	13.6725	15.451	22.013	27.5968	26.6287	27.649	25.6203	24.026	20.2587	14.019	8.38613	19.3596
2007	6.28548	11.6943	15.0713	22.4757	26.0339	27.725	26.7652	25.899	24.254	17.3432	13.0123	7.53774	18.6972
2008	6.01194	7.4869	17.0916	20.6893	24.9513	26.6693	27.3997	25.5839	23.9437	20.4839	13.1333	10.7197	18.715
2009	9.07516	11.7871	16.7952	21.746	27.0371	27.6677	27.681	27.0506	24.445	19.7494	13.2503	9.43355	19.6844
2010	7.72194	11.2732	19.0971	24.9663	27.94	27.4477	27.1548	26.269	23.8757	20.5929	14.0697	7.21903	19.8418
2011	6.09645	11.3736	16.139	20.653	27.1161	28.2567	27.1045	26.1777	23.9573	18.5623	14.6967	7.72419	19.0189
2012	6.11258	8.30621	14.8884	21.168	25.3694	28.456	28.3503	25.87	23.9853	18.2106	12.2223	8.13	18.4445
2013	6.21032	11.0132	15.869	21.1127	26.1213	28.497	27.2555	25.8929	24.5707	20.5945	12.344	8.38226	19.0252
2014	6.46503	9.60417	15.1115	20.8447	24.6535	28.5985	27.4961	26.138	23.7674	19.717	13.1566	7.48884	18.6277
2015	7.3713	11.8586	15.5173	21.7574	25.8443	26.8888	26.0726	26.0045	24.1864	19.9498	14.0756	7.66237	18.9599
2016	8.53574	10.3333	17.2285	22.548	27.1109	28.801	27.0747	25.6132	24.1472	20.1644	12.0838	9.56566	19.4567
2017	7.64428	10.6283	15.5011	22.8254	26.6977	27.0338	26.9797	26.1016	24.4415	19.405	12.4046	8.33938	19.0397
2018	6.83599	11.7262	17.119	22.7386	26.4894	28.0575	26.9296	26.0629	23.3604	18.4976	12.9011	7.03504	19.0085
2019	7.40995	9.8882	14.9197	23.0617	25.7171	29.0093	27.6416	26.1224	25.8196	19.4425	15.4799	7.21413	19.3438
2020	7.25091	10.2754	15.5346	21.5851	25.2654	27.9865	27.8581	26.8637	25.489	19.1504	11.9998	8.13293	18.966
2021	7.04728	11.6265	17.7899	20.9984	25.0848	27.0384	27.9097	26.4419	25.2258	20.1295	12.5034	8.32963	19.2143
MEAN	6.33179	9.4882	15.0665	20.8627	25.3686	27.5569	26.7579	25.688	23.8394	18.5585	12.0712	7.3479
STDEV	1.14771	1.51817	1.26044	1.30165	1.25623	0.801963	0.721736	0.533816	0.79242	1.18041	1.43019	1.19913
CV	18.1262	16.0006	8.36587	6.23912	4.95192	2.91021	2.69729	2.07808	3.32399	6.36051	11.848	16.3194

## Sheet: Jaisalmer
Row Labels	Jan	Feb	Mar	Apr	May	Jun	Jul	Aug	Sep	Oct	Nov	Dec	Jaisalmer Min Temp (1951-2021)
1951	7.40613	9.84821	16.6977	20.7417	25.82	26.9077	26.4319	24.6181	24.2953	22.7952	15.7667	9.72806	19.3027
1952	9.53	12.7059	16.4652	23.647	27.1419	27.2033	25.3652	24.1623	23.4773	20.2019	13.567	9.79677	19.4477
1953	9.35774	13.1136	18.6484	22.7217	25.6665	27.3123	26.0503	24.3587	23.478	18.7481	13.3783	11.2745	19.5373
1954	8.01645	13.1586	16.8626	22.3857	26.4494	27.303	25.7513	24.921	24.1293	18.4535	14.4107	9.12774	19.2667
1955	9.11806	11.8307	18.5803	19.9243	25.3865	27.0363	25.8058	24.8029	23.7937	19.2168	12.1433	9.19677	18.9411
1956	8.23613	10.0669	17.0352	22.0097	26.631	26.765	24.4071	23.4765	23.4893	19.1219	12.3317	10.0874	18.6575
1957	8.73806	9.03964	15.6729	21.6023	24.6058	26.465	25.4229	24.709	22.734	19.779	15.7343	10.1603	18.7696
1958	10.6126	11.3332	17.6835	23.9617	26.1597	27.4183	25.7735	25.7445	23.767	20.6584	14.645	11.4142	19.9741
1959	8.58645	11.0429	17.5832	22.5517	25.9519	27.065	25.1281	24.4132	23.642	21.2923	13.7713	9.52226	19.2518
1960	7.85871	11.9462	15.7174	20.849	24.6803	26.4167	25.6071	24.6332	24.1573	19.8032	12.798	10.1774	18.7319
1961	8.77871	10.2079	17.7942	21.283	25.9268	25.8403	25.4729	24.9997	23.9663	18.8345	13.1963	7.85935	18.7234
1962	6.34645	11.7804	16.3429	22.46	25.8255	26.2107	25.2987	24.4435	23.177	17.2994	13.593	9.70935	18.5652
1963	7.70258	12.3793	16.3926	21.9503	24.9813	26.61	25.8497	25.0716	22.9433	20.8074	16.115	10.2952	19.2857
1964	6.66129	10.6697	17.789	23.072	24.8523	25.6983	25.0184	24.5158	23.1433	18.5061	11.668	9.12	18.4077
1965	11.1084	11.1318	15.4342	20.684	24.401	25.866	24.8071	23.9061	22.5923	20.7055	14.768	8.22645	18.6719
1966	9.12774	13.3707	15.4687	21.557	24.7448	26.2697	25.6548	24.1894	22.7337	20.5077	14.6073	8.01323	18.8721
1967	5.80806	12.4893	15.8074	21.4333	24.5826	26.023	25.6268	24.4119	23.2173	19.5774	15.0853	11.7103	18.8376
1968	7.67226	10.2893	16.4026	21.6617	23.9852	27.013	25.8503	24.2255	24.307	19.7503	14.118	9.53419	18.747
1969	8.2229	10.4021	18.0919	22.2173	25.2703	27.2217	26.2787	24.49	23.918	21.2874	16.391	10.7223	19.5862
1970	9.6871	11.6693	16.519	23.1423	27.1981	27.2017	25.4303	24.8923	23.1317	20.3781	11.3553	7.63839	19.0567
1971	6.67032	10.7693	15.4748	23.9073	25.0942	25.8123	24.8729	24.2239	23.2527	19.54	13.5697	9.05774	18.55
1972	8.54226	7.54793	16.7058	21.128	25.3539	26.2263	25.0913	24.6432	22.4983	19.4748	13.6717	9.94484	18.4346
1973	7.46548	12.5711	16.1532	23.2893	25.8761	25.9067	25.1545	24.2894	23.1837	18.2239	12.268	8.01387	18.5531
1974	7.58774	8.70464	17.8884	22.6657	24.9452	25.343	25.8635	25.0432	24.0333	20.0071	12.4593	8.35645	18.628
1975	6.51935	9.65179	13.9781	21.377	25.3839	25.656	24.9326	24.3474	22.738	19.1503	10.7117	8.44097	17.781
1976	8.70774	10.8417	15.6923	20.4547	24.3571	25.715	25.1313	23.6539	21.8327	19.3732	15.769	9.04903	18.3947
1977	7.75355	11.8089	17.1252	22.5807	25.3245	25.981	25.0823	24.2929	22.9367	20.2742	16.1973	9.71839	19.1184
1978	6.99935	10.3671	15.5187	22.6877	26.2848	26.8547	24.7045	24.2865	22.6927	19.6977	15.735	9.69387	18.8278
1979	8.24452	10.6636	15.2784	21.8213	24.1784	27.634	26.0487	24.0958	23.4633	20.5123	16.7407	10.9077	19.166
1980	7.92	12.1393	16.6665	24.0333	26.3442	27.4493	25.6897	25.1313	24.2157	20.8671	14.6707	9.32806	19.545
1981	9.1529	11.6575	17.431	22.8123	25.5816	27.1053	25.4803	24.1829	24.2743	20.6316	13.1187	9.4329	19.2724
1982	9.01935	11.5193	15.1974	21.415	24.1865	26.514	25.7558	24.4442	23.3843	20.6384	14.8403	9.87355	18.9307
1983	7.54548	10.1889	15.5868	20.1893	24.8326	26.6737	25.5568	24.5813	24.079	19.2752	11.0217	8.31581	18.1937
1984	6.48161	7.67552	16.6913	21.964	25.8481	26.5613	24.909	23.9168	22.2087	17.8426	12.4997	8.53065	17.952
1985	7.54032	9.53071	17.7158	21.7157	25.5935	25.996	24.9974	23.9287	23.312	19.0529	14.0653	9.61	18.6332
1986	7.06581	10.1364	16.0735	22.0897	25.0177	26.5623	25.149	23.5097	22.6833	19.2184	14.0393	6.89129	18.2349
1987	8.23129	11.1221	17.3006	21.9143	24.5961	27.0213	26.2258	25.7452	24.2013	21.1768	13.7397	8.75065	19.207
1988	9.95839	13.1372	16.9042	23.7977	27.0168	27.9227	26.1329	25.1884	25.2567	20.5026	12.814	10.3671	19.9259
1989	6.94419	10.6404	16.3961	21.0863	25.6126	26.5813	25.8948	24.9023	23.7947	19.6177	14.9543	9.37032	18.8529
1990	9.87452	12.3846	15.1516	22.194	26.4823	26.6417	25.3739	24.6413	23.8693	18.5339	13.695	9.12387	19.023
1991	7.47774	10.5118	16.1748	21.0843	25.4294	27.3677	25.9474	24.6774	22.8487	17.6326	13.4773	9.53452	18.55
1992	8.14548	10.4131	15.8858	20.2867	25.0774	27.0983	25.2726	24.1084	21.3133	19.0394	12.0687	9.71323	18.2227
1993	8.87097	11.2911	14.6874	20.722	25.0358	26.2727	24.7584	24.2284	23.2473	20.3287	14.1843	8.73581	18.5615
1994	8.78774	9.49286	16.4742	20.3797	25.1468	26.354	24.0565	23.0852	20.9953	16.5771	12.3803	8.14935	17.6977
1995	7.61871	11.5246	15.6603	21.1953	25.5965	27.9923	25.9729	25.079	23.993	21.3142	13.496	10.6542	19.2103
1996	8.31452	11.4352	19.3135	21.563	25.0329	26.2723	25.7155	23.8597	23.163	19.8177	12.234	8.22484	18.7629
1997	7.84677	11.1014	17.54	20.7383	24.2742	25.4127	26.3661	24.5945	23.9763	19.71	14.9693	8.86548	18.8188
1998	8.62032	11.5607	16.9145	23.2777	26.6606	27.0187	25.8255	25.4223	24.6263	21.09	14.3273	9.73968	19.6265
1999	8.50742	12.6943	16.7352	22.6233	25.681	26.0217	25.7394	24.1248	24.354	20.5442	15.1557	9.22581	19.3079
2000	8.69484	9.84207	15.6487	22.688	25.8132	26.2303	25.4113	25.0561	23.7853	21.2168	15.372	10.5565	19.2131
2001	7.90677	11.8354	17.2484	21.7327	25.8726	26.2967	25.0248	24.4571	23.799	21.3826	15.1407	10.7629	19.3227
2002	8.53258	10.9768	17.8987	22.9803	26.5242	27.0577	25.4671	24.6984	22.9663	20.6887	15.394	11.0545	19.5619
2003	8.71355	11.8561	16.7061	22.594	24.7152	25.925	24.5026	24.3906	22.9923	18.8961	13.4763	8.97839	18.6728
2004	8.51194	11.6538	18.1506	23.5397	25.4006	25.724	25.2861	23.6787	23.6167	18.6081	14.574	10.5471	19.1182
2005	7.32258	10.6289	17.1135	20.4477	24.6506	25.971	24.6868	23.44	23.2443	18.5303	13.696	7.55871	18.1391
2006	8.30935	14.2329	15.7487	21.3787	25.2981	25.1397	24.801	23.269	23.3543	21.0381	15.261	10.3777	19.0319
2007	8.78645	13.9182	17.0152	23.2033	25.8406	27.1833	25.8474	24.6048	24.513	18.7216	14.7687	9.45613	19.5019
2008	7.48323	8.63276	18.2003	21.526	24.4287	26.2453	25.5977	24.219	23.64	21.24	14.923	12.7594	19.1043
2009	10.7497	13.7521	18.7152	22.8043	27.0174	26.898	26.441	25.6823	24.2977	20.8997	14.8813	11.4342	20.3305
2010	9.36806	12.4954	20.02	24.632	27.5426	27.4333	26.44	25.1752	23.5097	21.3077	16.078	8.77258	20.2654
2011	7.51774	12.5732	17.859	22.0787	26.4994	27.7093	26.14	25.3013	23.5527	19.959	16.8953	9.77194	19.6812
2012	7.66129	9.49069	16.0884	22.7533	25.8045	26.822	26.5819	24.9597	23.8553	19.4603	14.238	10.6732	19.053
2013	8.24645	12.1593	17.39	22.7613	26.1065	27.4613	25.9565	24.8532	24.3307	21.7477	14.1787	9.74419	19.6104
2014	7.89041	11.2685	16.5712	22.6628	25.6482	27.9924	26.4562	25.397	23.5955	21.1725	16.2203	9.45349	19.5614
2015	9.02937	13.4197	17.4269	23.8747	26.9099	27.1793	26.1078	25.1538	24.2378	21.1265	15.5839	9.52511	19.9882
2016	10.4648	12.3315	18.9598	23.3359	27.4141	27.8561	26.4851	24.8857	23.9758	21.1934	13.8011	11.8089	20.2302
2017	9.2783	12.5828	17.8664	23.3209	27.0652	27.4541	25.568	25.2925	24.2386	20.8596	14.2638	10.5236	19.8923
2018	9.38915	13.5764	18.552	23.8144	27.2866	27.395	26.1485	24.8692	23.2785	20.618	15.139	9.26558	19.9697
2019	9.19316	11.332	17.1341	24.2684	26.4136	28.3789	27.1035	25.2035	25.4703	20.8306	16.4982	9.51326	20.145
2020	8.32413	11.9173	16.9687	23.5619	26.5687	27.6011	27.0227	25.9482	25.0607	21.0646	13.2382	9.86363	19.7761
2021	7.73546	12.9014	18.8827	22.942	26.003	26.637	26.4271	25.0327	24.9512	20.8649	14.631	10.2888	19.8037
MEAN	8.31125	11.3371	16.8658	22.2218	25.6469	26.7099	25.6089	24.5744	23.5604	19.9833	14.177	9.60034	19.0787
STDEV	1.0637	1.42381	1.17307	1.12697	0.887795	0.720225	0.615237	0.60202	0.809126	1.16989	1.41307	1.09275	0.603537
CV	12.7983	12.5588	6.95533	5.07147	3.46161	2.69647	2.40243	2.44979	3.43426	5.85434	9.9673	11.3824	3.1634

## Sheet: Jalore
Row Labels	Jan	Feb	Mar	Apr	May	Jun	Jul	Aug	Sep	Oct	Nov	Dec	Jalore Min Temp (1951-2021)
1951	7.68871	9.80929	16.6161	20.2353	25.4016	26.0343	25.5906	23.7387	23.685	22.5384	15.5527	9.97935	18.9535
1952	9.72581	12.9428	16.4023	23.4557	26.941	26.436	24.3613	23.2552	22.612	19.6503	13.2743	10.2019	19.113
1953	9.62806	13.1693	18.8019	22.4553	25.3371	26.6527	25.2348	23.5171	22.7403	18.1281	13.15	11.4416	19.2149
1954	8.15613	13.0971	16.8016	22.179	26.1745	26.631	24.8542	24.0916	23.195	17.6661	14.2123	9.40645	18.8902
1955	9.75645	11.7811	18.5819	19.4923	24.7997	26.1847	24.8187	23.9487	22.896	18.5658	11.8253	9.50387	18.5508
1956	8.78258	10.2069	16.9487	21.7337	26.3271	25.954	23.5374	22.7026	22.657	18.5665	11.9893	10.4165	18.3381
1957	9.02	8.98964	15.5716	21.2137	24.01	25.6157	24.4248	23.861	21.977	19.2361	15.5353	10.5774	18.3827
1958	10.8077	11.2207	17.6094	23.769	25.8168	26.5863	24.7016	24.79	22.8267	19.8332	14.137	11.5535	19.513
1959	9.12516	10.9532	17.6694	22.107	25.2677	26.1997	24.1352	23.4952	22.8277	20.7242	13.6963	9.86194	18.8774
1960	8.35677	12.1348	15.6529	20.448	24.2468	25.823	24.7671	23.6468	23.3337	19.1552	12.5063	10.6223	18.402
1961	9.23032	10.0632	17.7755	20.9183	25.5229	25.0437	24.581	24.1845	23.1407	18.4019	13.4403	7.94226	18.3968
1962	6.41226	11.6139	15.9587	21.9213	24.9745	25.1853	24.0339	23.0981	22.0153	16.5945	12.9333	10.3026	17.9437
1963	7.88355	12.5161	16.3365	21.5737	24.469	25.7333	24.7971	24.0145	22.1737	20.2387	16.2987	10.5265	18.9043
1964	7.15871	10.6986	17.9716	23.2703	24.1	25.0373	23.9816	23.6777	22.505	18.4148	11.5853	9.47452	18.1704
1965	11.351	11.0757	15.4168	20.3787	24.0939	25.361	23.9868	23.0655	21.9327	20.3987	14.7093	8.8329	18.4194
1966	9.53742	13.5368	15.6519	21.3987	24.2081	25.5873	24.6058	23.0252	21.6167	19.6361	14.9053	8.23774	18.5102
1967	6.15613	12.4943	15.3516	20.7767	23.8287	25.165	24.5352	23.1932	21.963	18.71	14.8233	12.6255	18.3235
1968	8.25839	10.2738	16.2829	21.4027	23.579	26.536	24.6535	23.09	23.4717	18.9645	13.726	9.74903	18.3441
1969	8.8871	10.9264	18.5461	22.3653	25.3903	26.7573	25.5606	23.5368	23.204	20.389	16.7633	11.5097	19.5262
1970	10.1803	12.1311	16.6226	23.3527	27.3735	26.3507	24.6242	24.0268	22.5467	19.9432	11.6937	8.43419	18.9735
1971	7.54516	11.06	15.9068	23.7513	24.9716	25.2177	24.1187	23.5194	22.6703	19.449	13.912	9.87129	18.5289
1972	9.33387	8.44655	17.1365	21.181	24.9903	25.626	24.3255	23.9003	21.749	19.3255	13.848	10.5319	18.396
1973	8.25774	12.8561	16.6026	23.2347	25.6323	25.1913	24.2174	23.4129	22.436	18.1394	12.6217	8.97	18.4841
1974	8.32774	9.07893	17.7342	22.464	24.4945	24.8847	24.8571	24.0361	23.2853	19.8816	12.51	8.83323	18.4154
1975	6.77194	9.76464	13.9939	21.1657	25.3332	24.8863	24.0097	23.6145	22.376	18.9035	10.713	8.52774	17.5436
1976	9.23742	10.9834	15.6965	20.5073	24.2945	24.996	24.2494	22.9329	21.1327	18.8306	16.6277	10.2619	18.3252
1977	8.61581	12.1211	17.3265	22.2557	24.6071	24.7343	23.7652	23.389	22.264	19.8626	16.183	10.3668	18.8176
1978	7.58194	10.6325	15.5497	22.5263	25.8432	26.0673	23.7455	23.349	21.955	19.2719	15.9357	10.2161	18.5877
1979	9.15032	10.7036	15.1719	21.4473	23.7223	26.9413	24.9819	23.1829	22.6277	20.1081	17.083	11.4132	18.9105
1980	8.56645	12.3645	16.7235	23.7913	25.971	26.5667	24.9023	24.3306	23.57	20.4858	14.861	10.1235	19.3619
1981	9.29484	11.7289	17.1697	22.6057	25.0839	26.6947	24.4752	23.3726	23.5657	20.2516	12.9047	10.0335	18.9634
1982	9.89452	11.4139	14.9952	20.8707	23.3997	25.8157	24.8094	23.439	22.4663	20.2303	14.9617	10.2752	18.5791
1983	7.80355	9.99607	15.4319	19.657	24.3058	25.765	24.339	23.4052	23.0687	18.451	10.3947	8.72	17.651
1984	7.33742	8.1169	16.6348	21.6483	25.1455	25.5483	23.8113	22.8984	21.3387	17.4735	12.429	9.00871	17.6391
1985	8.18742	9.47214	17.7135	21.2507	24.9294	25.3863	23.9213	22.8294	22.4967	18.3735	13.7877	10.0587	18.2446
1986	8.06161	10.6668	15.9239	21.845	24.3877	25.817	24.2239	22.5603	22.1597	19.0758	13.9927	7.39484	18.0372
1987	8.75065	11.1639	17.1926	21.7227	24.1919	26.3123	25.4465	24.7881	23.5787	20.5039	13.4203	9.64806	18.9309
1988	10.4058	13.27	16.9377	23.569	26.6881	27.1797	25.1045	24.2539	24.467	19.9016	12.659	10.2494	19.5651
1989	7.26129	10.6111	16.3677	20.9387	25.5516	25.9323	24.9658	23.8277	22.9	18.8952	14.9623	9.76097	18.5333
1990	10.2529	12.2036	14.9397	21.8867	25.8894	25.7987	24.2668	23.6748	22.9057	18.1258	13.667	9.5529	18.6225
1991	7.80032	10.9186	16.2687	20.825	24.9152	26.6607	24.7397	23.639	21.793	16.9394	13.492	9.69613	18.172
1992	8.30903	10.1141	15.8171	19.848	24.4277	26.1627	24.4248	23.1165	20.3567	18.2613	12.2427	9.85323	17.7653
1993	8.77645	11.1164	14.4971	20.1683	24.4197	25.2817	23.6545	23.1758	22.509	19.7835	13.9137	8.80258	18.0379
1994	9.11839	9.21893	16.2345	19.726	24.4484	25.1993	22.7587	21.7155	19.95	15.8971	11.8613	8.57581	17.0998
1995	7.9029	11.4864	15.6806	20.8583	25.0916	27.1897	25.0045	24.1842	23.102	20.7368	13.51	11.0945	18.8547
1996	8.93	11.5172	19.4681	21.39	24.6971	25.6473	24.7152	22.9303	22.4147	19.3861	12.564	8.93613	18.5667
1997	8.21258	10.9982	17.4065	20.4343	23.8387	24.5447	25.4023	23.6465	23.1433	19.2555	15.2787	9.4471	18.5026
1998	8.94452	11.2886	16.7165	22.931	26.1168	26.363	24.8568	24.479	23.694	20.3842	14.0983	9.38516	19.1398
1999	8.31548	12.645	16.3152	22.2977	25.2852	25.1267	24.5548	23.1026	23.4863	19.6168	14.2913	8.8629	18.6788
2000	8.84839	9.60379	15.3123	22.616	25.2655	25.5817	24.5252	24.3442	23.063	20.679	15.235	10.1842	18.7904
2001	8.00161	11.6514	17.2374	21.4887	25.5129	25.6113	24.1503	23.7545	23.242	20.8603	14.8417	10.8035	18.9635
2002	8.8971	11.1807	18.0355	23.1393	26.5281	26.571	24.97	24.0919	22.2227	20.0332	14.9983	11.1123	19.3554
2003	9.18323	12.1189	16.8845	22.9	24.9142	25.4627	23.8935	23.5374	22.4027	18.1419	13.8563	9.39161	18.5817
2004	8.69581	11.2417	17.8406	23.3013	25.0719	25.1207	24.2945	22.5997	22.7393	17.8097	13.952	10.52	18.6099
2005	7.31871	10.2204	17.0784	19.8037	24.3913	25.228	23.7239	22.4742	22.419	17.5806	12.929	7.55516	17.5927
2006	8.37129	13.7746	15.3952	20.877	24.9658	24.514	23.729	22.4571	22.644	20.2229	14.8083	10.76	18.5587
2007	8.85161	13.6054	16.6071	22.777	25.5413	26.576	24.9787	23.7852	23.7873	17.8497	14.1283	10.0761	19.0613
2008	7.71774	8.12414	17.7968	21.1493	24.0645	25.413	24.6355	23.3958	22.9113	20.7803	14.913	13.26	18.7114
2009	11.2345	13.7071	18.6168	22.5337	26.8087	26.3527	25.54	24.7768	23.6653	20.7139	15.2237	12.2135	20.1482
2010	9.61774	12.7929	20.3042	24.754	27.51	26.83	25.6387	24.3177	22.5843	20.9716	16.547	9.47839	20.1442
2011	7.94387	12.6579	17.9342	21.9973	26.2287	27.051	25.2377	24.5129	22.8377	19.5342	16.7757	10.6632	19.4739
2012	8.16677	10.0007	16.34	22.7733	25.4916	26.3383	25.9632	24.1132	23.115	19.0761	13.9543	11.0835	18.8872
2013	8.53194	12.3975	17.28	22.4227	25.8361	26.5717	24.971	23.8926	23.517	20.941	14.1913	10.1435	19.2539
2014	8.77615	11.3904	16.4333	22.2303	24.936	27.4604	25.5526	24.4089	22.7478	20.6253	15.988	9.97104	19.2426
2015	9.5119	13.4683	17.4092	23.3147	26.6223	26.2815	25.1746	24.3378	23.6343	20.6657	15.9941	10.0599	19.729
2016	10.6257	12.4536	18.9226	23.4145	27.1309	27.3421	25.5224	23.9536	23.2739	20.8152	13.5826	11.8861	19.9292
2017	9.73241	12.7113	17.7227	23.0911	26.5473	26.4449	24.5828	24.3528	23.5494	20.3494	14.4458	11.1114	19.5842
2018	9.43448	13.441	18.5307	23.52	26.7987	26.5265	24.8947	23.8845	22.2038	19.8854	14.7547	9.30526	19.4555
2019	8.91745	11.0922	16.549	23.8294	26.0097	27.8583	26.0951	24.3206	24.63	20.0805	16.4774	9.74012	19.6644
2020	8.77476	11.5353	16.5242	22.9562	26.135	26.5347	26.0993	24.956	24.2452	20.3963	13.0484	10.1831	19.2983
2021	8.43959	12.3887	18.3209	22.0908	24.9872	25.5436	25.6029	24.0258	23.932	20.153	13.9357	10.4858	19.1902
MEAN	8.71329	11.3683	16.8056	21.9468	25.2371	25.9666	24.6508	23.6473	22.7627	19.4327	14.0854	9.9952	18.7455
STDEV	1.03327	1.37971	1.20864	1.21319	0.966395	0.746077	0.653747	0.635371	0.829856	1.19753	1.48896	1.09682	0.618522
CV	11.8586	12.1365	7.19188	5.52786	3.82927	2.87322	2.65203	2.68686	3.64569	6.16246	10.5709	10.9735	3.29958

## Sheet: Nagaur
Row Labels	Jan	Feb	Mar	Apr	May	Jun	Jul	Aug	Sep	Oct	Nov	Dec	Nagaur Min Temp (1951-2021)
1951	5.71161	7.88071	14.9594	19.5117	25.54	27.0863	27.2042	25.1852	24.4057	22.18	14.013	7.93129	18.5239
1952	7.60097	11.4328	15.12	22.9313	27.1745	27.808	26.1939	24.9177	23.7853	19.1274	12.0647	7.91258	18.8489
1953	7.49258	11.6618	17.6794	21.9083	25.9745	28.1783	26.8855	25.0223	23.8587	17.9613	11.9047	9.84935	19.0653
1954	6.48097	11.7971	15.7577	21.5503	26.6774	27.9373	26.5661	25.7206	24.6497	17.4613	13.0893	7.45516	18.7858
1955	7.81871	10.4343	17.7252	19.1667	24.7468	27.9263	26.7503	25.4232	24.0587	18.3174	10.6833	7.69516	18.4383
1956	6.80516	8.85345	15.7968	21.308	27.0884	27.669	25.2165	24.1742	23.9683	18.7287	10.5673	8.57742	18.2517
1957	7.62903	7.75464	14.8152	20.4973	24.0752	26.9573	26.0319	25.3984	22.8797	18.8632	13.872	8.64323	18.1711
1958	8.85032	9.72286	16.5323	23.6	25.9513	28.0287	26.4916	26.2171	24.0923	19.6094	12.8793	9.74032	19.3573
1959	7.20935	9.52679	16.4284	21.527	25.4113	28.156	26.0532	25.1977	24.25	20.8029	12.7637	7.91548	18.8143
1960	6.52258	10.7776	14.6294	19.9927	24.7681	27.4363	26.4165	25.4023	24.5137	19.109	11.131	8.21129	18.2557
1961	7.52677	8.71964	16.5058	20.549	25.7448	26.826	26.3661	25.5258	24.517	18.4326	11.909	6.01613	18.2681
1962	5.03774	10.6704	15.3177	21.993	25.4006	27.2197	26.0097	25.2558	23.4147	16.6765	11.9307	8.09871	18.1129
1963	5.40935	10.8696	14.9765	20.9627	24.4187	27.64	26.6126	25.6619	23.387	20.2435	15.152	8.19613	18.6567
1964	5.09258	9.22276	16.8129	23.0443	24.2994	26.5707	25.5177	25.1832	23.5573	17.7052	10.102	7.52097	17.901
1965	9.17355	9.51214	14.0474	19.5533	24.1532	26.7417	25.5677	24.4826	22.8957	20.2042	13.4807	6.21484	18.0428
1966	7.20226	12.3846	14.5448	20.748	24.5403	26.9707	26.269	24.4587	22.7533	19.4029	12.543	5.58032	18.1347
1967	4.01935	11.1107	14.02	20.593	24.1577	26.844	26.2919	24.9074	23.1843	18.1726	13.4027	10.2848	18.1076
1968	6.30355	8.57793	14.7819	20.4927	23.8016	28.269	26.051	24.7674	24.4573	18.5687	12.5073	7.91194	18.0555
1969	6.37452	8.92464	16.4413	20.9283	24.7074	28.512	26.929	25.1452	24.1063	19.8877	14.429	7.90484	18.7349
1970	7.88613	9.88214	15.2358	21.8483	27.2506	27.729	25.98	25.0603	23.4497	18.7797	9.95867	6.7371	18.3592
1971	5.35129	9.415	14.1203	22.82	24.7284	26.6793	25.3452	24.7342	23.225	18.6177	11.9357	6.98806	17.8626
1972	6.70323	6.34862	15.1971	20.19	24.9777	25.957	25.5923	24.9213	21.796	17.1758	11.5733	7.70645	17.3773
1973	5.90258	11.1143	14.6494	22.0177	25.859	27.396	26.251	24.8803	23.715	17.3735	10.336	5.62903	17.9508
1974	4.92968	6.63321	15.4445	21.316	24.6419	25.676	26.0113	25.1852	23.582	17.9168	9.935	6.1571	17.3421
1975	4.96903	7.355	12.9297	20.151	25.811	25.859	25.311	25.0381	23.3973	18.9219	9.89	6.96	17.2685
1976	7.91194	9.94828	14.5477	20.1863	24.9829	26.0163	26.1861	24.5426	22.479	18.9126	14.5443	7.10968	18.1292
1977	5.78484	9.68429	15.1768	21.1687	24.4235	26.152	25.3216	24.6797	23.078	19.1729	14.2253	7.8971	18.0987
1978	6.22097	9.14107	14.7248	21.642	27.2513	27.8183	24.9871	24.9058	23.0653	18.3045	13.557	7.32742	18.2844
1979	6.78677	9.60679	13.7939	21.1037	23.3658	28.036	27.11	25.1665	23.14	19.6032	15.4263	9.29097	18.5721
1980	6.27161	10.7672	15.3829	22.9473	26.7384	28.5833	26.4652	26.1116	24.7677	20.5939	13.465	8.25935	19.2067
1981	8.18065	11.0011	15.971	21.9227	26.4684	28.332	26.1719	25.0148	24.5423	19.6339	12.729	7.76226	19.0112
1982	7.40161	9.09607	13.0761	19.8703	22.8565	26.3893	26.4097	24.8042	22.9867	19.4929	13.4593	8.17645	17.8756
1983	6.06194	8.79679	14.6297	19.0413	24.1829	26.8017	25.9403	25.2042	24.5407	18.6461	9.71133	7.14226	17.6033
1984	4.89839	6.61862	15.6816	21.3097	26.1974	27.7667	25.8123	25.0132	22.8597	16.8655	11.1997	7.11516	17.6369
1985	6.58774	8.58286	17.2529	21.6703	26.1403	27.2383	26.0426	25.0329	23.99	17.7845	12.7323	8.92258	18.5477
1986	6.25194	9.19429	15.21	21.5847	24.94	27.4943	25.9174	24.4619	23.399	19.1519	13.3883	5.33839	18.0626
1987	7.22581	10.5546	16.2142	21.1073	23.7032	27.3437	27.1668	26.3329	24.7623	20.2542	11.6277	6.9271	18.6392
1988	8.08387	11.2414	15.4381	22.8607	27.6581	28.3563	26.5274	25.2226	24.8863	19.3871	12.2613	8.37258	19.2031
1989	5.86774	8.86107	14.9939	19.5743	25.3303	27.0603	26.3874	25.5316	24.0657	19.2874	13.9677	8.34935	18.3187
1990	8.92645	11.1861	14.4506	21.6373	26.7274	27.6407	26.0039	25.3484	24.271	18.3119	13.0303	8.08161	18.8327
1991	6.65871	9.85429	15.5874	20.277	25.6697	27.8687	27.2839	25.4013	23.2543	17.49	12.4597	8.60161	18.4087
1992	7.47903	9.65448	15.1752	20.26	24.7981	27.9567	25.5816	24.4448	21.732	18.1332	11.8233	8.60581	17.9888
1993	7.3229	10.6932	14.01	20.5977	25.9074	26.933	25.3581	25.1813	23.721	19.6177	13.6257	7.57645	18.4107
1994	7.8829	8.78607	15.7323	19.6373	25.2761	26.9337	24.5774	24.2032	22.2703	16.9419	12.4653	8.37516	17.8024
1995	6.59935	10.6668	14.5242	20.6227	25.8648	28.8827	26.6477	25.2748	24.0897	20.2655	12.2923	9.01323	18.7648
1996	7.22484	10.3562	17.5726	20.8953	24.7135	26.5183	25.9313	24.4194	23.4707	18.68	11.1657	6.58161	18.1439
1997	6.28613	9.85464	16.4035	20.278	23.6819	25.889	27.281	25.3071	24.5607	18.6784	13.9887	8.37742	18.4216
1998	7.86613	11.2304	15.7687	22.6247	26.7797	27.6283	26.4994	26.1439	24.9403	20.5726	14.1077	8.59742	19.4316
1999	7.99032	11.7904	15.7874	21.9897	26.2223	26.8367	26.5816	24.9239	24.6393	19.8681	14.3683	8.14194	19.1236
2000	7.87645	9.27862	15.0077	22.9667	27.2365	27.8367	25.9842	25.629	24.1177	20.371	14.1903	8.5471	19.1055
2001	6.62871	10.5393	16.0174	21.311	26.5526	26.8373	25.8442	25.1403	23.377	20.73	13.1897	8.95097	18.8009
2002	7.2771	9.77429	16.7945	23.208	27.5697	28.4697	27.4055	26.2935	24.122	20.6474	14.778	9.75516	19.7234
2003	6.97355	10.8754	15.7181	22.3273	25.0013	27.633	25.1371	25.4358	23.903	18.3452	12.1803	8.19419	18.5062
2004	7.62226	11.0314	17.5729	23.795	26.0913	26.8157	26.8416	24.6535	24.4457	18.7619	13.401	9.30258	19.2073
2005	7.03774	10.7354	17.1216	20.1373	24.8719	27.4417	25.9735	25.3487	24.3593	18.8468	13.2693	6.51452	18.5041
2006	7.48968	14.3946	16.081	21.9013	27.761	26.807	27.3416	25.011	24.1293	20.8429	14.6367	8.90226	19.6263
2007	7.12129	12.5164	15.7661	22.97	26.2981	27.8607	26.4448	25.4535	24.4607	17.9868	13.797	8.09355	19.0827
2008	6.5771	8.04034	17.7432	21.2327	24.969	26.7	26.9306	25.1977	23.9813	21.1884	14.0703	11.4613	19.0404
2009	9.69871	12.5407	17.5977	22.3937	27.4135	27.6283	27.3281	26.6658	24.6783	20.589	14.0623	10.4319	20.1246
2010	8.29323	11.8946	19.8729	25.561	28.3919	27.6763	26.7813	25.8948	23.9077	21.2526	15.027	7.82452	20.2352
2011	6.77839	12.0193	17.0842	21.497	27.4506	28.3307	26.6874	25.7468	23.919	19.1748	15.4563	8.50065	19.4157
2012	6.67161	8.99345	15.7835	21.9697	25.8477	28.2757	27.9652	25.5348	24.136	19.1323	13.206	9.08871	18.9048
2013	7.05839	11.6889	16.7077	22.0117	26.5768	28.489	26.9277	25.4594	24.762	21.151	13.116	8.9171	19.4394
2014	7.00832	10.17	15.7416	21.5016	24.9386	28.5421	27.1164	25.8166	23.8695	20.5074	14.2609	8.34775	19.024
2015	8.05234	12.6205	16.3038	22.6161	26.3005	27.0023	25.732	25.5771	24.3952	20.686	14.9057	8.35085	19.4028
2016	9.22388	11.109	17.9843	23.2743	27.4937	28.79	26.8025	25.2454	24.1617	20.9563	12.9576	10.4271	19.8902
2017	8.27741	11.46	16.4922	23.5512	27.1299	27.2808	26.6745	25.715	24.6036	20.2979	13.4454	9.04362	19.5339
2018	7.4431	12.3163	17.876	23.4208	26.7708	27.9479	26.5237	25.6027	23.4135	19.4388	13.8402	7.87286	19.3997
2019	7.93675	10.3141	15.6029	23.8301	26.407	29.1683	27.3167	25.6785	25.8403	19.8758	15.8559	7.80373	19.6682
2020	7.72703	10.8862	16.171	22.1953	25.9527	27.818	27.5906	26.2692	25.3053	19.5675	12.3272	8.83306	19.2364
2021	7.40935	12.1263	18.3925	21.6086	25.2383	26.686	27.3206	25.7473	24.9556	20.1605	12.6527	8.9378	19.3042
MEAN	7.01349	10.1842	15.7888	21.5393	25.6908	27.4449	26.349	25.2628	23.8909	19.2451	12.9338	8.11101	18.6533
STDEV	1.1129	1.54578	1.28809	1.29178	1.21885	0.79045	0.687947	0.521716	0.777759	1.20187	1.46349	1.16332	0.671601
CV	15.8679	15.1783	8.15824	5.99734	4.74433	2.88014	2.61091	2.06516	3.25546	6.24509	11.3152	14.3424	3.60045

## Sheet: Sri Ganga Nagar
Row Labels	Jan	Feb	Mar	Apr	May	Jun	Jul	Aug	Sep	Oct	Nov	Dec	Sri Ganga Nagar Min Temp (1951-2021)
1951	3.6671	5.46036	12.1265	16.7573	23.3555	26.58	27.8877	25.6119	23.3837	19.9287	11.299	5.43903	16.8548
1952	5.39161	9.07	12.5397	20.4377	25.0268	26.9937	26.5945	25.3735	23.1463	16.9106	9.07733	5.12935	17.1547
1953	5.23355	9.22214	15.301	19.4463	25.0139	27.8263	27.0748	25.3252	23.243	15.8632	8.964	7.43839	17.538
1954	4.29097	9.75357	13.0842	19.1067	25.041	27.6097	26.8816	26.2042	24.2463	14.9532	10.0823	4.73484	17.1927
1955	5.65097	7.89464	15.1819	16.713	22.2281	27.7863	27.259	25.4461	23.3137	16.3545	8.35933	5.54	16.8595
1956	4.63032	6.50034	13.351	19.0667	25.679	27.2657	25.4761	24.6642	23.4773	17.0545	8.015	6.37968	16.8239
1957	5.81613	5.30893	12.2171	17.6533	22.0939	26.3257	26.4916	25.7623	21.941	16.6345	10.917	6.46419	16.5305
1958	6.57548	7.35643	13.8165	21.217	23.6868	27.559	26.6368	26.1858	23.3473	17.3226	10.0913	7.51258	17.661
1959	5.19806	7.28393	13.5429	18.927	23.3581	27.9477	26.4494	25.5981	23.8207	18.8645	10.5273	5.47258	17.2976
1960	4.22581	8.41828	12.2948	17.487	23.2123	27.1123	26.7423	25.7645	23.7243	16.7494	8.403	5.30065	16.6364
1961	5.51065	6.5675	13.7655	18.1573	23.8171	26.8667	26.829	25.6848	24.1087	16.7003	9.37733	3.60484	16.8013
1962	3.02161	8.63	12.989	19.823	23.491	27.165	26.4887	25.869	22.792	15.0313	9.52533	5.72129	16.7446
1963	2.70968	8.37214	12.569	18.4177	22.4074	27.367	26.9997	25.7939	22.8343	18.25	12.9263	6.03903	17.0921
1964	3.17065	6.89103	14.4261	20.6383	22.2539	26.327	25.6132	25.5358	22.7703	15.4506	7.47867	5.24484	16.3356
1965	6.67032	7.20964	11.6806	17.185	22.1342	26.797	25.9694	24.761	22.0927	18.0181	10.807	3.52258	16.4487
1966	4.46484	10.1814	12.2777	18.557	22.9639	26.4367	26.5087	24.7987	22.0653	17.0077	9.325	3.31452	16.5151
1967	2.19452	8.83786	11.6245	18.0897	22.1348	26.6373	26.5406	25.1455	22.5473	16.1484	10.6027	7.66355	16.5446
1968	4.46581	6.18414	12.3716	17.8557	22.3248	27.813	26.2571	25.4739	23.7253	16.5348	9.766	5.69903	16.5603
1969	4.30387	7.44607	14.4548	18.7773	22.799	27.945	26.9648	25.8026	23.337	18.321	10.9743	4.86194	17.2116
1970	5.6271	7.28464	12.8706	19.2013	24.5432	26.454	26.1955	25.0794	23.8273	17.7674	8.46133	4.35194	16.8542
1971	3.10968	7.31179	12.419	20.4407	23.6716	27.3377	25.7923	25.0997	21.7597	16.5884	9.73367	5.17226	16.5762
1972	4.5429	4.90931	13.1742	17.8353	23.4026	27.0163	26.5813	24.7584	20.879	15.3345	10.6927	7.04935	16.3804
1973	4.81194	9.2675	12.6319	19.6323	24.4781	27.9753	27.1023	25.8074	24.387	16.3965	8.91	4.45871	17.1861
1974	3.57194	4.9925	13.06	19.339	23.2655	24.8357	25.8926	25.2961	22.476	14.659	7.82733	4.39065	15.8585
1975	3.95516	5.82679	11.32	18.2753	24.1097	25.577	25.4619	25.571	23.302	17.9081	8.309	5.5929	16.3247
1976	6.53774	9.08552	12.5213	18.0673	23.2961	25.0167	26.1358	24.6503	22.6867	17.3452	10.4157	4.81419	16.7306
1977	4.58677	7.18679	13.0752	19.5383	22.799	25.6623	25.9268	25.4316	23.047	18.251	12.659	6.98355	17.1427
1978	3.96806	6.65107	11.6826	18.686	25.0871	27.192	25.0568	24.9539	22.377	15.9777	10.7443	5.19	16.5085
1979	5.66839	8.0025	11.6555	19.391	21.3132	26.892	26.6613	25.8148	21.7487	17.299	12.7417	7.36323	17.0858
1980	4.80161	8.30172	12.3258	19.7113	25.0665	27.694	26.3255	25.5819	23.0807	18.1748	10.8773	6.66032	17.4008
1981	6.58258	9.32429	13.59	19.0257	24.5039	26.7687	26.5245	25.9513	23.7393	16.4606	10.8057	4.83065	17.3781
1982	5.40258	6.98036	11.2994	17.684	21.229	25.4527	26.7606	25.2016	22.1257	17.5213	11.1323	6.4	16.4809
1983	4.81871	7.49214	12.13	16.815	22.3306	25.3077	25.9206	25.569	24.1983	16.5794	8.734	5.39742	16.3193
1984	2.96226	5.51828	14.2568	19.3763	25.0242	28.2433	26.0071	26.0606	22.55	15.3187	9.552	4.99645	16.6806
1985	5.27032	7.22714	14.9503	19.7167	24.3465	26.8377	26.2526	25.9697	23.7363	16.5377	10.5443	7.66613	17.4745
1986	4.05774	7.39893	12.9971	18.6307	22.2987	26.387	25.7203	24.9877	22.4467	17.2184	11.2757	4.18419	16.5062
1987	5.4429	9.01929	13.97	19.1163	21.4006	26.1393	27.0829	26.2803	23.9467	17.9858	9.09533	4.70774	17.0533
1988	5.66774	8.27103	12.9113	20.0147	25.3952	27.5403	26.7581	25.5861	23.906	17.2965	10.876	6.66452	17.5919
1989	4.52355	6.54857	12.5471	16.6317	23.121	26.0683	26.5048	25.3906	23.3263	16.9284	11.2093	6.22032	16.6376
1990	6.97194	9.24143	12.2429	18.732	24.7923	27.345	26.1158	25.6819	23.97	16.6935	10.956	6.07032	17.4369
1991	4.64742	8.105	13.1223	17.839	23.8042	26.604	28.0074	25.9971	23.276	15.7694	10.175	6.74097	17.0535
1992	6.15677	7.78241	13.0268	18.4463	23.0384	27.2967	25.8252	25.0055	21.773	16.4242	9.96533	6.72323	16.8096
1993	5.54226	9.29	11.9106	18.6477	24.5971	26.7933	25.7248	25.9919	23.0247	16.5729	11.035	5.38452	17.0756
1994	6.33032	7.28429	13.9103	17.731	23.8077	26.646	25.5555	25.4952	22.4207	15.8455	10.9393	6.76839	16.9457
1995	4.89645	8.43107	12.1819	18.3767	24.2497	28.03	26.9194	25.3823	23.4403	18.2906	10.4237	6.99903	17.3444
1996	5.56032	8.49655	15.2748	18.5983	22.9258	25.8827	26.3048	25.0587	23.0803	16.6345	8.69633	4.29484	16.7536
1997	3.62903	7.2125	13.6848	17.8983	21.5423	25.4077	27.3471	25.5984	24.0797	16.7784	11.1743	6.97516	16.8245
1998	5.48774	9.14714	13.0519	20.0337	24.7103	27.012	27.0758	26.721	24.4837	18.9961	11.37	6.39484	17.9142
1999	6.93516	9.63179	13.5481	19.9447	24.729	26.4253	26.909	25.4739	24.15	18.2355	11.9487	6.14226	17.8765
2000	5.9871	7.16414	12.361	20.3257	26.5387	27.388	26.4919	26.1029	23.5037	18.2394	11.892	5.83129	17.6753
2001	4.55742	7.97179	13.271	19.1457	25.1184	26.1617	26.6042	25.8939	22.5343	18.6868	10.5567	6.88419	17.3333
2002	5.3929	7.75786	14.1713	20.8223	25.9074	27.9293	28.3435	26.8294	22.9097	18.2084	12.011	7.27	18.1841
2003	4.57645	8.71643	13.3055	19.7023	22.9223	27.3997	25.1339	25.2771	23.2977	16.3029	9.53267	6.85	16.9519
2004	6.0929	8.67069	15.07	21.792	24.6468	25.848	27.5461	25.3929	23.8583	17.6161	11.9323	7.46839	18.0142
2005	5.07645	8.72714	14.619	17.9307	22.7377	26.9673	26.2632	26.1794	23.724	17.161	10.5557	3.93774	17.0271
2006	5.86161	12.275	13.8952	19.8607	26.2832	25.9637	27.5126	25.8026	23.581	19.2713	12.816	7.19452	18.3857
2007	4.99871	9.97571	13.5613	20.8343	24.6661	26.9733	26.62	26.0171	23.6217	16.2071	11.2763	5.89806	17.5822
2008	4.10387	5.92483	15.0116	19.052	23.19	25.7917	27.1023	25.3939	22.7863	19.1829	11.3267	8.63	17.3267
2009	7.20161	9.69179	14.291	19.762	24.85	26.694	27.13	26.8397	23.6723	18.2752	11.3647	7.11935	18.118
2010	5.73516	9.4975	16.6723	22.8203	25.9697	26.3383	26.6532	26.0423	23.179	19.1639	12.0333	5.56129	18.3474
2011	4.90839	9.90357	14.3916	18.859	25.8026	27.284	27.1087	26.1413	23.8743	17.4413	12.8983	6.08032	17.9257
2012	5.12806	6.85828	13.1471	19.478	23.9416	28.0887	28.0713	25.9081	23.5537	16.9652	10.7373	6.69645	17.4049
2013	5.06516	9.66464	14.1429	19.352	24.5916	27.8727	27.3181	25.9519	24.0293	19.6484	10.6623	7.08935	17.9894
2014	5.33539	8.08705	13.3116	18.5038	22.9193	27.6176	27.2681	26.1243	23.2254	18.3885	11.4059	6.3024	17.4196
2015	6.17824	10.3265	13.7115	19.8614	24.0889	26.0479	26.0321	25.8612	23.4252	18.7466	12.5079	6.64077	17.8177
2016	7.27793	8.77246	15.2657	20.7378	25.5404	28.0392	26.9911	25.7604	23.8777	19.1002	11.1911	8.2647	18.4262
2017	6.65321	9.36321	13.6935	21.1031	25.488	26.4931	27.2618	26.3441	23.8139	18.4159	11.1032	6.97036	18.1019
2018	5.3746	9.85293	15.2111	20.7024	24.6087	27.3647	26.8947	26.2185	23.0689	17.1108	11.5701	5.80129	17.849
2019	6.63015	8.82899	13.0369	20.9761	23.8439	27.8401	27.2164	26.1619	25.4846	18.3758	13.7965	6.34205	18.2464
2020	6.43749	8.92248	13.8793	19.3977	23.4769	27.0766	27.4781	26.8991	25.1209	17.4372	10.5959	6.86465	17.8173
2021	6.33699	10.1907	16.016	18.7466	23.6753	26.5369	27.6908	26.5655	24.9543	19.1885	11.0261	6.94587	18.1979
MEAN	5.12914	8.09795	13.3661	19.1191	23.841	26.8721	26.6316	25.6895	23.2994	17.3101	10.5717	6.01851	17.1993
STDEV	1.13129	1.44733	1.15839	1.24129	1.27493	0.813185	0.692319	0.515401	0.82714	1.20876	1.33695	1.16377	0.606946
CV	22.0561	17.8728	8.66662	6.49243	5.34763	3.02613	2.59961	2.00627	3.55005	6.98294	12.6465	19.3365	3.5289

## Sheet: Tonk
Row Labels	Jan	Feb	Mar	Apr	May	Jun	Jul	Aug	Sep	Oct	Nov	Dec	Tonk Min Temp (1951-2021)
1951	5.99452	7.7575	14.8145	19.2303	25.1561	26.7573	26.359	24.3377	23.7863	21.6752	13.9467	7.72161	18.1826
1952	7.69	11.7907	14.8532	22.6723	27.2648	27.0547	25.0713	23.8677	23.175	18.0103	10.7303	8.44613	18.394
1953	7.73871	11.4129	17.0687	21.4373	26.3729	27.816	25.7945	24.1594	23.078	16.8606	10.7933	8.89516	18.4846
1954	6.32226	11.8121	15.2248	21.114	26.4442	27.7727	25.5323	24.5739	23.5717	16.1271	12.1	7.26161	18.1741
1955	8.36871	9.61321	16.4332	18.1283	24.85	27.0777	25.3839	24.361	23.2717	17.7152	9.585	7.91581	17.7724
1956	7.23419	8.32552	15.2126	20.624	26.8261	26.8767	23.999	23.3484	22.9493	17.9761	9.90967	8.50968	17.6736
1957	7.28613	7.08821	14.2765	20.1863	23.8245	26.2583	25.2671	24.3965	22.078	17.9048	13.4493	8.7929	17.6215
1958	8.84258	9.5275	15.8926	22.8947	25.4581	27.3207	25.1119	24.9042	23.308	18.4726	12.2117	9.77645	18.6878
1959	7.63387	9.10643	15.7397	20.7857	24.9461	27.388	24.7652	23.9961	23.304	19.7284	12.1183	7.95194	18.1656
1960	6.57226	10.0748	14.2613	19.3143	24.3123	26.9637	25.3316	24.1939	23.4453	17.9658	10.289	8.55968	17.622
1961	7.43548	8.565	15.7887	20.0803	25.6852	26.5193	25.2745	24.7	23.606	17.9123	12.2807	5.43645	17.8181
1962	4.42645	10.1718	14.3868	20.929	24.7535	26.819	25.0923	23.9226	22.5937	15.3716	11.2607	9.17871	17.4355
1963	5.49065	10.9061	14.7555	20.675	24.7406	27.0423	25.409	24.3768	22.652	19.4452	15.595	8.41161	18.3173
1964	5.45419	9.20966	16.6316	22.925	24.1835	26.467	24.9135	24.5748	23.2017	17.7403	10.144	7.62452	17.7705
1965	9.27419	9.51643	14.1071	19.994	24.6694	27.3127	25.1494	24.0339	22.466	19.4997	12.8583	7.23097	18.0501
1966	7.46194	12.1064	14.1003	20.5993	24.6813	26.2013	25.1939	23.5426	21.85	18.3839	13.609	6.01839	17.8291
1967	4.19806	10.3311	13.4274	19.5637	23.7303	26.195	25.021	23.4571	22.039	17.2503	13.0317	11.6648	17.5216
1968	6.93258	8.59483	14.3326	19.967	23.8	27.9117	24.9803	23.5265	23.704	17.8023	11.3373	7.94548	17.584
1969	6.86258	9.59	16.8674	21.327	25.0868	28.542	25.8745	24.2687	23.424	18.9584	14.6207	8.03	18.6584
1970	8.32548	9.98786	15.2339	21.8157	27.1087	26.9227	25.5152	24.5003	23.6023	18.9013	10.5717	7.62452	18.385
1971	6.22581	9.42357	14.2961	22.5017	24.6342	26.1153	24.1555	23.7758	22.4793	18.6729	11.9663	7.40516	17.6709
1972	7.0829	7.53621	15.2274	20.2473	24.9058	25.9003	25.0765	23.8616	20.9487	16.8813	11.6217	8.34871	17.3306
1973	7.18194	11.2732	15.1523	22.378	26.5613	27.9383	25.3965	24.3181	23.6403	18.0942	10.7657	7.50645	18.3777
1974	5.81839	7.35607	15.4819	21.501	24.8516	25.8207	24.869	24.0561	23.121	18.3494	10.1577	7.0229	17.4189
1975	5.84806	8.05357	13.2587	20.5023	26.4377	25.637	24.5719	24.2219	23.232	19.2471	10.1827	7.49065	17.4397
1976	8.92194	10.8672	15.1574	20.7607	25.3035	25.4053	25.4219	23.8068	22.4693	18.5271	15.547	8.16484	18.3744
1977	6.65419	9.65429	15.0781	21.36	23.9571	25.6703	24.29	23.9342	22.6473	19.1429	14.5283	8.81581	18.0124
1978	6.50355	9.09786	14.2213	20.9027	27.201	26.8717	24.0945	23.871	22.3853	17.5303	13.2483	7.6971	17.8402
1979	7.70968	9.80393	13.9929	20.9237	23.4245	27.177	26.0984	24.3506	22.6103	19.44	16.367	10.0894	18.5346
1980	7.20839	10.6607	15.2161	22.114	26.659	26.951	25.2145	24.8174	23.441	19.6339	13.1513	8.63387	18.6551
1981	8.16452	10.6082	15.5019	21.461	26.2484	27.8367	24.7835	23.9419	23.3917	18.5532	12.1383	7.45	18.3721
1982	8.36	9.43714	13.0816	19.8743	22.4971	25.9847	25.561	23.7255	22.2627	19.1097	13.5083	8.73387	17.7158
1983	6.3871	8.46821	14.0168	18.647	23.7674	25.6213	24.7084	23.9442	23.472	17.7148	9.083	8.01742	17.033
1984	6.66613	7.55207	16.0123	21.631	26.5919	27.6217	25.1858	24.3942	22.6333	17.2826	11.7787	8.26645	17.9927
1985	7.70032	8.70286	17.2148	22.1813	26.4629	27.693	25.5406	24.3729	23.452	17.6371	12.526	10.2839	18.6982
1986	7.53968	10.0236	15.51	21.6697	24.781	27.2133	25.15	23.9365	23.1663	19.4732	13.724	6.59419	18.2641
1987	8.17032	11.3118	16.5981	21.1637	23.9171	27.4147	27.0716	25.8961	24.7837	20.4006	12.2353	8.41258	18.9839
1988	8.64161	11.5366	15.8681	22.6447	28.0748	27.248	25.3677	24.3926	24.342	18.8958	12.639	9.00484	19.0666
1989	6.50806	9.31179	15.0423	19.8163	25.9474	26.8187	25.4819	24.1797	23.198	18.1635	13.4327	8.72806	18.0939
1990	8.78677	11.1864	14.5265	21.5663	26.4161	27.0677	24.9277	24.6635	23.5783	18.9032	13.544	9.08355	18.719
1991	7.6229	11.7232	16.7232	21.0907	26.5006	28.2343	26.8245	24.6074	23.1523	18.0329	12.762	9.46452	18.9274
1992	8.34226	10.0459	16.0426	21.0583	25.4755	28.2893	25.6461	24.2423	22.018	18.4661	12.5833	9.33323	18.4803
1993	8.65903	11.0814	14.7945	21.2637	26.5742	26.6637	25.0881	24.6645	23.633	19.8177	13.8733	8.30935	18.7354
1994	9.43452	9.5025	16.3558	20.4483	25.7339	26.206	23.7526	23.5277	22.1833	17.3997	12.9587	8.97	18.0832
1995	7.26903	10.8357	15.0403	21.3657	25.8565	28.7803	25.781	24.3774	23.3553	20.3945	12.647	9.69387	18.8182
1996	7.83161	10.0569	17.5019	21.014	25.171	26.8313	25.4442	23.87	23.2887	19.0206	11.963	7.25484	18.2882
1997	6.56097	9.80714	16.2913	20.1983	23.3561	25.4043	26.09	24.3748	23.745	18.1706	14.4517	9.05419	18.1628
1998	7.71129	10.9996	15.1019	22.127	26.3987	27.1667	25.2648	24.9916	24.0237	19.9645	14.296	8.81129	18.9369
1999	7.71968	11.8104	15.5739	22.102	26.3668	26.319	25.681	24.3658	23.7807	19.3239	13.674	7.96	18.7498
2000	8.36968	9.51241	15.1703	23.4497	27.4635	27.9243	25.3623	25.4335	24.1953	20.43	14.7717	8.73806	19.2516
2001	7.29548	10.7896	15.9784	21.4327	27.0181	25.7147	24.7961	24.5135	23.678	20.3345	13.074	9.33452	18.7027
2002	8.32774	10.7368	17.231	23.6087	28.1039	28.3343	27.4277	25.7474	23.9127	20.6423	14.8633	11.1139	20.051
2003	7.86032	12.1757	16.8165	23.5237	26.3368	28.399	25.3997	24.8813	23.796	18.7152	13.8847	9.90871	19.3328
2004	8.49484	11.029	17.8929	24.5343	26.4329	26.8513	26.4342	24.3316	24.3677	19.4042	13.6933	9.93323	19.4642
2005	7.61194	10.4696	17.0552	19.495	25.061	26.7963	24.3277	24.8165	24.3133	19.019	13.4703	7.38968	18.3537
2006	8.27065	14.2607	16.2674	22.7507	27.5558	25.754	25.3855	23.6648	23.9157	20.6952	15.1287	10.3113	19.5135
2007	8.50871	13.2621	16.3152	23.9077	26.98	27.5713	25.5223	24.8042	23.9407	18.02	14.159	9.42419	19.385
2008	7.7729	8.51931	17.9252	21.7767	25.7165	25.7513	25.8026	24.3868	23.582	20.4442	14.1043	12.1674	19.0278
2009	10.5832	12.5032	17.4671	22.273	27.2519	27.777	26.2255	25.609	24.323	20.2055	14.4167	11.3377	20.0352
2010	8.55129	12.1571	19.2435	25.2083	28.4635	27.6913	26.1284	25.089	23.3063	20.7613	16.0917	8.74387	20.1527
2011	7.2071	11.9854	16.8642	21.6667	27.4635	27.4783	25.6723	25.0106	23.5627	19.2368	15.562	9.5329	19.2994
2012	7.34903	9.70379	15.7716	22.4027	25.9429	28.4417	27.0494	24.739	23.7633	18.9658	12.9477	9.67742	18.9137
2013	7.22161	11.7414	16.5126	22.127	26.9429	27.5683	25.6945	24.6081	24.3393	20.9097	13.178	9.82871	19.2559
2014	8.58651	10.8817	15.8512	21.4333	25.1451	28.3806	26.5382	24.9934	23.6224	20.5588	14.4178	8.71405	19.1296
2015	8.40595	12.6067	16.1878	22.2336	26.3279	26.3842	25.138	24.96	24.0695	20.5804	15.4054	8.83231	19.2854
2016	9.54637	11.4179	17.8991	23.2975	27.253	28.3488	25.7634	24.5356	23.9914	20.7627	12.8814	10.6429	19.7136
2017	8.98158	11.6049	16.3132	23.3801	26.7252	26.6524	25.6375	24.7236	24.0033	19.7248	13.2699	9.94037	19.2809
2018	7.91967	12.5209	17.3992	23.2395	26.8469	27.7737	25.652	24.7751	22.7089	19.0106	13.7087	7.70789	19.1292
2019	7.53076	10.3577	15.0229	22.9931	25.7841	28.318	25.927	24.6104	24.8076	19.5352	16.2873	8.13812	19.1375
2020	8.16252	10.482	15.5961	21.6937	25.5765	26.685	26.3323	25.1795	24.8787	19.7231	12.2492	9.00596	18.8143
2021	8.33399	11.7094	17.7804	20.9676	24.1591	25.9565	26.2293	24.5947	24.2017	20.0147	12.5789	9.44227	18.8663
MEAN	7.57278	10.333	15.7162	21.4954	25.7538	27.0376	25.437	24.4019	23.3637	18.9245	12.9851	8.69666	18.5073
STDEV	1.13807	1.48218	1.24749	1.35946	1.29164	0.87723	0.704511	0.531516	0.753759	1.22794	1.67211	1.23281	0.707309
CV	15.0284	14.3441	7.93763	6.32444	5.01535	3.24448	2.76963	2.17818	3.2262	6.48863	12.8772	14.1757	3.82178

## Sheet: Udaipur
Row Labels	Jan	Feb	Mar	Apr	May	Jun	Jul	Aug	Sep	Oct	Nov	Dec	Udaipur Min Temp (1951-2021)
1951	7.88387	10.0046	16.7016	20.1497	25.08	25.5703	24.5806	23.0542	22.981	21.84	15.2467	9.93871	18.6302
1952	9.93258	13.1186	16.2739	23.068	26.5294	25.6273	23.6206	22.52	21.975	18.981	12.478	10.6481	18.7392
1953	9.80903	13.3964	18.5703	22.2433	24.9555	25.8447	24.2926	22.9129	22.101	17.5732	12.8487	10.9635	18.8154
1954	8.2671	13.1643	16.7219	21.9437	25.6348	25.772	24.0035	23.3903	22.2287	16.9842	13.4523	9.3371	18.4247
1955	10.0226	11.9543	18.4219	19.3833	24.669	25.4517	24.0168	23.2226	22.256	18.2381	11.4173	9.42129	18.2421
1956	9.19774	10.2959	16.8955	21.4133	25.6226	25.236	22.7223	22.121	21.9617	18.0777	12.1023	10.3042	18.0141
1957	8.94613	8.90036	15.3587	21.115	24.0639	25.0657	23.6552	23.1213	21.4393	18.5503	15.5527	10.8623	18.0978
1958	10.7713	11.2564	17.3071	23.3723	25.7535	25.8863	23.8794	23.8535	22.1467	19.2371	14.0663	11.4748	19.123
1959	9.40419	11.0454	17.2745	22.0697	25.3655	25.546	23.3416	22.8448	22.1307	20.0023	13.7133	10.1581	18.6115
1960	8.73097	12.2772	15.5855	20.395	24.1542	25.266	24.0752	22.8387	22.5413	18.5052	12.4093	10.9216	18.1517
1961	9.34645	9.94929	17.5248	20.9187	25.3974	24.4203	23.7294	23.4771	22.34	17.8823	13.824	8.17742	18.124
1962	6.59839	11.6689	15.7768	21.5807	24.7748	24.678	23.301	22.3242	21.38	15.9519	13.089	10.669	17.6708
1963	8.58065	12.7539	16.4213	21.331	24.4771	25.0377	23.8003	23.0394	21.2543	19.3945	16.169	10.7423	18.6055
1964	7.29129	10.921	17.6997	23.0043	23.9626	24.6723	23.3481	23.0842	22.053	18.3765	11.845	9.65258	18.0049
1965	11.5765	11.4443	15.3671	20.7107	24.1265	25.228	23.3929	22.5826	21.4607	19.8135	14.7303	9.94452	18.3979
1966	10.3706	13.6032	15.6623	21.2227	23.9639	25.0107	23.8858	22.5845	21.01	19.1429	15.5347	8.70032	18.4051
1967	6.62871	12.26	15.2739	20.6117	23.9132	24.5953	23.5177	22.4281	21.2247	18.241	14.4503	13.2671	18.0578
1968	8.74935	10.591	16.2042	21.118	23.3539	26.0143	23.7529	22.1742	22.7037	18.5294	13.5983	10.0497	18.0803
1969	9.26839	11.615	18.7965	22.4307	25.5826	26.2613	24.5316	22.7635	22.3497	19.1197	16.6207	11.47	19.2674
1970	10.1703	12.1436	16.5852	23.119	26.8984	25.1423	23.7648	23.2816	22.1933	19.5861	11.6567	8.2529	18.5975
1971	7.88903	10.8546	15.7284	23.0583	24.6942	24.4497	23.1442	22.599	21.8213	18.8226	13.102	9.19806	17.9759
1972	9.20226	8.70759	16.6413	20.6487	24.399	24.934	23.3719	22.79	20.699	18.2484	12.8893	10.0352	17.7404
1973	8.31355	12.6454	16.6645	22.896	25.6497	25.1337	22.9687	22.8061	21.5113	18.2897	12.7487	9.97452	18.3217
1974	8.55516	9.27679	17.5423	22.232	24.249	24.7047	23.9648	23.1958	22.7437	19.7223	11.9363	9.05258	18.1452
1975	6.98645	10.0768	13.9242	21.0503	25.3277	24.3787	23.2123	22.6903	21.7003	18.8558	10.6017	8.41452	17.3036
1976	9.2171	11.0097	15.6758	20.0607	23.7319	23.9827	23.4161	22.1671	20.7153	18.2423	17.338	10.8535	18.0454
1977	8.76839	12.3129	17.5174	22.2837	24.2781	24.1963	22.9548	22.7335	21.455	19.2681	16.215	10.6584	18.5775
1978	7.87871	11.2932	15.771	22.3153	25.5387	25.4767	23.129	22.7171	21.6617	18.9106	16.1837	10.5871	18.4817
1979	10.139	10.8171	15.3655	21.2173	23.6855	26.3533	24.2974	22.5168	22.228	19.9026	17.3567	11.8603	18.8447
1980	9.37742	12.5214	17.0839	23.5897	25.7223	25.4617	24.3142	23.5816	23.0033	20.2371	15.3463	10.4719	19.2339
1981	9.7229	11.8707	17.1342	22.383	24.8913	26.2623	23.7881	22.7203	22.9863	19.7826	12.7443	10.2535	18.7418
1982	10.4794	11.9561	15.1145	20.7883	23.2919	25.5137	24.161	22.7565	21.9767	19.8194	15.213	10.7216	18.5101
1983	8.18968	10.2529	15.4	19.8027	24.331	25.2293	23.6494	22.8626	22.515	18.0342	9.958	8.83871	17.4595
1984	7.86258	8.41414	16.2381	21.389	24.8623	25.1503	23.1371	22.1345	20.8563	17.1561	12.299	9.14387	17.4083
1985	8.55452	9.38107	17.38	21.136	24.6513	25.3563	23.3919	22.1574	21.9507	17.8597	13.5287	10.6752	18.0455
1986	9.18097	11.5907	16.2355	21.9	24.3874	25.4773	23.8129	22.1894	21.9327	18.9432	14.1243	8.18452	18.1877
1987	9.36065	11.6871	17.2377	21.3717	24.5826	26.0037	25.421	24.4052	23.4517	20.3939	14.0087	10.7616	19.0941
1988	10.6203	13.4228	17.2497	23.3277	26.5687	26.5643	24.3081	23.6103	23.772	19.1355	12.4503	10.3677	19.2906
1989	7.53452	10.8968	16.3332	20.8093	25.0516	25.3683	23.8445	22.8071	21.9747	17.8123	14.4103	9.72129	18.0773
1990	10.0603	11.8725	14.3706	21.0527	25.2006	24.8707	23.2058	22.729	21.844	17.8352	13.3853	9.74613	18.04
1991	7.66516	11.3904	16.3242	20.7727	24.7768	26.228	23.9571	23.0061	21.3413	16.4087	13.576	9.56548	17.9432
1992	8.64935	10.0459	15.8419	19.754	24.2294	25.6053	24.0006	22.6571	20.0457	18.1323	12.4877	10.0994	17.6503
1993	9.37323	11.2804	14.841	20.3277	24.4774	24.967	23.159	22.7819	22.13	19.6713	13.9207	8.84774	18.0107
1994	9.79516	9.52964	16.3106	19.7117	24.239	24.3433	22.0323	21.1255	19.708	15.8087	11.7893	8.59516	16.9548
1995	8.28258	11.7396	15.6868	20.777	24.6297	26.7833	24.2906	23.4481	22.43	20.4152	13.539	11.3258	18.6439
1996	9.40839	11.5031	19.2161	20.8793	24.619	25.265	23.8848	22.1745	21.532	18.6868	12.41	8.91645	18.2248
1997	8.17065	10.5093	17.1287	20.0717	23.4255	24.0633	24.5523	22.9819	22.4807	18.8855	15.6447	10.0265	18.1983
1998	8.88645	10.8164	16.1265	22.3847	25.5629	25.8523	23.95	23.5577	22.72	19.6526	13.5307	8.68355	18.511
1999	7.67387	12.2886	15.5113	21.2433	24.6148	24.437	23.5481	22.359	22.3453	18.3361	12.647	7.71548	17.7446
2000	8.37677	9.29138	14.2403	21.5763	24.1461	24.7263	23.3839	23.5958	22.412	19.559	14.6053	9.20839	17.9423
2001	8.06903	11.4239	16.8916	21.3083	25.5281	24.8927	23.2887	23.0694	22.58	20.0865	14.0313	10.3526	18.4934
2002	9.00419	11.4089	17.9794	22.7583	26.2771	26.1	24.5271	23.2961	21.6613	19.4152	14.3717	11.1165	19.0309
2003	9.81226	12.6557	16.7861	22.9013	25.0158	25.1973	23.7539	23.2303	21.767	17.4855	14.4573	9.44935	18.5632
2004	8.61871	10.71	17.2861	22.975	24.7452	24.6177	23.599	21.7813	22.057	17.4623	13.8383	10.4674	18.1912
2005	7.4371	10.1025	16.8952	19.497	24.3313	24.8173	23.1368	21.9345	21.8387	16.95	12.171	7.45516	17.2464
2006	8.64097	13.27	15.441	20.8223	24.6371	23.924	22.6216	22.0348	22.4207	19.7935	14.54	11.2145	18.2977
2007	9.66903	13.9254	16.7503	22.7857	25.7406	26.101	24.1829	23.2206	23.21	17.309	13.863	10.3681	18.9402
2008	8.20613	8.11	17.3394	21.0923	24.1723	25.0457	23.981	22.7187	22.2197	19.7484	14.301	13.1523	18.3711
2009	11.3403	13.3243	18.159	22.129	25.9471	25.8293	24.3994	23.8565	23.0943	19.4332	14.818	12.2429	19.5779
2010	9.62968	12.7393	19.4713	23.9433	27.1597	26.3847	24.5884	23.3071	21.8303	20.2035	16.4903	9.24355	19.6106
2011	7.66355	12.2182	17.1658	21.5523	25.4881	25.9627	24.0135	23.3384	22.016	19.0458	15.796	10.4452	18.7504
2012	7.89	9.98138	15.6861	22.531	24.9726	25.898	24.8868	23.3006	22.2827	18.3461	12.9743	10.6668	18.3013
2013	8.08258	12.1232	16.7461	21.9417	25.6365	25.2987	23.7197	22.9971	22.7937	20.0674	13.5983	9.80258	18.5946
2014	9.14929	11.4893	16.1277	21.5508	24.5422	26.6567	24.7347	23.5677	22.1636	20.0091	15.7281	9.55453	18.8025
2015	9.13865	13.0561	16.9993	22.4305	26.0386	25.2291	24.2968	23.4555	22.8542	20.1241	15.8677	9.60545	19.1135
2016	10.207	12.2358	18.4884	22.8785	26.3216	26.6184	24.3975	23.0991	22.7012	20.0084	12.5416	10.6758	19.1972
2017	9.4781	12.3683	17.0709	22.3686	25.7917	25.7111	23.5085	23.3501	22.6507	19.204	13.3724	10.7971	18.8345
2018	9.17767	12.982	17.6783	22.7386	26.1478	26.0564	23.7795	23.1942	21.6257	19.2526	14.1747	8.74784	18.8183
2019	7.95204	10.7776	15.7967	22.4436	25.0435	26.5776	24.8021	23.3343	23.1999	19.3485	16.6654	9.812	18.8415
2020	8.72876	11.3267	15.7953	22.0264	25.6336	25.1492	24.6975	23.6318	23.1604	19.7046	12.3831	9.68945	18.5092
2021	8.89572	11.7051	17.4419	21.7224	24.7902	25.223	24.7388	23.2643	23.226	20.047	13.9045	10.598	18.8303
MEAN	8.90861	11.4021	16.5951	21.6396	24.9585	25.3628	23.8186	22.9079	22.099	18.8718	13.8688	10.0411	18.3989
STDEV	1.04006	1.31805	1.12713	1.07663	0.847739	0.69225	0.599466	0.559221	0.750316	1.12842	1.57469	1.1222	0.543318
CV	11.6748	11.5597	6.79192	4.97531	3.39659	2.7294	2.5168	2.44118	3.39525	5.97939	11.3542	11.1761	2.95298
