# Supplementary material
Source: Research Square preprint supplement (doi:10.21203/rs.3.rs-9151742/v1)
Supplement: Supplementary file 1 [file ea7ef0351bbd14cadcfff2f1.docx]

**Data downloading using Anaconda software and imdlib package**

#importing the package

import imdlib as imd

#file directory(Copy the file directory path and paste)

path = "C:/Users/dell/Desktop/perception analysis final folder/New folder (3)/tmin/"

#starting year and ending year

start_yr = 1951

end_yr = 2021

#mentioning the variable; 'rain' or 'tmax' or 'tmin'

variable = 'tmin'

#getting the data, opening the data and saving it as an array

imd.get_data(variable, start_yr, end_yr, fn_format='yearwise', file_dir=path)

data = imd.open_data(variable, start_yr, end_yr,'yearwise', path)

ds = data.get_xarray()

print(ds)

#inserting the coordinates( coordinates of districts)

latLong = [[21.75, 87.5], [21.75, 87.75]]

for points in latLong:

lat = points[0]

lon = points[1]

#converting the data into csv format

data.to_csv('test.csv', lat, lon, path)

print ("data save for ",points)

#THE END

**Trend analysis**

Importing the data through environment option in rstudio

install.packages("trend")

library(trend)

#Step 1: Check ACF: (The auto-correlation factor (ACF) quantifies how strongly current values in a time series are related to past #values at different time lags.)

acf(filename$variable)

#variable maybe rainfall , temeprature

#if data is not having auto-collinearity

mk.test(filename$variable)

sens.slope(filename$variable)

#if data is having auto-colinearity

install.packages("modifiedmk")

library(modifiedmk)

mmky(filename$variable)
