# Supplementary material
Source: Research Square preprint supplement (doi:10.21203/rs.3.rs-9151742/v1)
Supplement: Supplementary file 2 [file 8a09324ebd4f7e736e317cdc.xlsx]

## Sheet: Ajmer
	Jan	Feb	Mar	Apr	May	Jun	Jul	Aug	Sep	Oct	Nov	Dec	Ajmer Max Temp (1951-2021)
1951	23.021	26.3518	31.5277	35.303	40.4471	39.0623	36.6742	31.9258	36.2143	36.9529	30.837	25.1077	32.8101
1952	25.3752	27.7728	32.0094	38.1757	41.571	39.1297	33.2826	31.1965	34.0793	34.77	30.2583	25.3568	32.7462
1953	22.3535	28.7721	34.7526	37.0153	40.1539	38.954	34.4242	31.3658	33.1053	34.4484	30.4947	28.5213	32.8748
1954	23.2687	26.6036	32.0845	37.3913	40.7997	39.219	33.9984	33.4652	32.3103	31.7948	29.871	25.5265	32.2129
1955	22.7284	27.1554	34.2681	35.9353	39.8939	39.8707	35.6674	32.0235	31.9983	31.5235	28.6763	24.791	32.0618
1956	23.2232	27.0124	32.2423	37.755	42.0281	38.2653	31.5423	30.7752	33.776	30.5623	28.2393	24.819	31.6814
1957	21.6332	25.2529	30.2068	36.1117	38.6713	39.5673	34.6148	33.1052	33.3993	34.219	30.6783	25.0077	31.8931
1958	25.5016	27.3911	33.259	39.4067	41.3029	41.291	33.3232	34.0587	30.7443	32.4884	29.344	25.3181	32.8037
1959	23.0332	26.1093	34.5326	37.8473	40.4816	39.85	33.5694	31.1994	31.649	33.2965	29.1343	25.9	32.2407
1960	23.4803	30.2186	30.9284	36.3043	40.8894	39.5763	34.5335	31.3945	35.1343	34.5323	29.9843	26.0894	32.7421
1961	23.4384	23.8682	33.5394	36.74	40.5671	38.4853	34.0126	32.6313	31.4733	32.6771	28.3877	23.5523	31.6544
1962	23.4374	27.1489	32.0184	37.933	41.4674	39.412	34.9706	32.9281	32.5043	33.0839	30.0057	25.0542	32.5139
1963	24.5639	29.0293	32.2813	36.6677	40.1829	39.8807	36.1968	32.7168	33.3923	34.6416	29.7773	25.2265	32.8889
1964	22.099	26.7138	34.7835	39.291	40.3294	39.4543	34.1561	32.5042	33.4217	34.5977	29.8403	25.511	32.7277
1965	25.74	27.18	31.7852	35.314	39.7561	40.1537	34.74	33.5316	34.415	35.3026	31.2867	25.2077	32.8879
1966	25.5923	29.3836	31.9335	37.253	40.5816	38.772	36.7384	32.1429	33.5797	36.101	29.8447	25.3929	33.121
1967	23.0058	29.9025	30.451	36.165	40.6013	39.3527	34.8661	31.6516	32.58	34.5445	30.492	23.3839	32.2427
1968	22.1023	24.58	31.8939	37.657	39.9848	41.4423	35.5445	32.6932	36.655	35.2506	31.3027	25.7865	32.9111
1969	24.2526	27.4493	35.539	38.585	40.8445	41.2013	36.4339	32.9826	34.6577	36.2032	31.0637	27.0677	33.8818
1970	24.5319	25.7611	31.5903	39.3553	42.7555	39.3783	35.3584	32.2503	32.626	34.5481	29.9253	26.2826	32.895
1971	23.0303	27.6525	32.7652	39.3847	39.4016	36.7287	32.3148	31.7123	33.9673	33.8935	30.5333	26.2606	32.3107
1972	24.7545	23.7934	33.4152	36.911	41.5677	40.45	35.6916	32.4287	34.6517	35.0523	31.0893	25.2971	32.944
1973	23.0019	27.8486	32.321	39.7727	42.359	39.247	34.4565	31.3258	32.434	34.0548	30.091	23.4423	32.5367
1974	23.9881	25.0754	34.8242	38.8363	40.7429	38.752	34.681	34.1139	36.3863	33.7948	29.7523	23.4358	32.8957
1975	21.8139	24.7046	31.5716	38.319	41.451	38.561	33.1819	32.0055	31.3473	32.1055	28.4527	26.2194	31.6738
1976	24.3761	25.8697	31.5468	36.8123	40.4135	38.592	35.0032	31.3613	32.4297	34.8226	29.3027	24.1871	32.0693
1977	22.9984	27.2475	34.9939	37.249	39.6339	38.415	32.1948	31.9074	32.256	35.8003	31.17	26.1952	32.5235
1978	23.8565	24.7107	30.5987	37.9817	42.9161	39.641	32.0252	31.9506	33.431	35.1416	30.402	25.7048	32.3933
1979	23.851	24.8086	30.2119	38.7027	39.4074	41.3973	34.9577	33.0129	35.5707	34.6055	29.5013	24.8839	32.599
1980	23.4513	27.8124	31.3458	39.5577	42.1448	40.035	33.809	34.2029	35.946	36.1329	30.0597	24.6894	33.2611
1981	23.1784	27.4725	31.189	38.9567	41.4661	41.9233	33.631	32.9026	35.5057	34.9081	27.7613	24.8545	32.821
1982	22.9426	23.8096	29.23	36.4503	37.4048	40.3383	36.3119	32.5387	35.5847	35.4442	28.3657	25.1055	31.9922
1983	23.2842	24.78	30.9706	33.7797	39.6258	39.6503	35.0806	32.6016	34.1683	33.6055	29.8173	25.0142	31.8958
1984	22.5065	24.6755	34.8371	38.7107	43.1542	39.9743	34.8748	32.4726	32.5357	34.5287	30.6503	26.2913	32.9517
1985	23.6287	28.5621	35.6045	38.154	42.3661	39.8207	34.5032	32.07	34.8883	33.2684	31.1783	26.1126	33.3565
1986	23.5658	24.9036	32.4348	38.838	40.9745	40.2377	34.8094	32.6506	35.8217	35.6465	31.1503	23.9016	32.9376
1987	24.0477	28.5661	33.1648	38.4463	39.2061	40.8213	38.0006	36.4358	36.8737	36.8661	31.8757	25.6984	34.1818
1988	25.3674	28.9055	32.6081	40.0747	43.8155	41.1093	34.0255	33.0581	35.2603	34.6755	30.942	26.6794	33.8715
1989	23.2865	26.9711	32.3452	37.563	42.0477	39.2643	35.07	33.1816	35.1297	35.5394	31.2363	24.8774	33.0624
1990	26.7826	25.2546	30.499	37.994	40.6652	39.048	32.8716	32.3145	32.6497	33.9548	30.0877	25.4523	32.3267
1991	23.2706	26.9875	32.7674	36.7437	41.1929	41.095	36.5303	32.6926	33.635	35.0006	28.9167	25.7416	32.9053
1992	24.2377	25.3345	32.0329	36.7943	40.9652	42.274	35.3535	32.1984	32.8393	33.3632	29.3503	26.5048	32.6141
1993	24.3677	28.7568	30.7519	37.5263	42.3984	39.989	33.9587	34.7368	33.9827	35.4419	31.0213	26.8965	33.3312
1994	24.4687	26.2771	34.649	36.661	41.789	39.5977	32.1403	31.1948	32.3067	34.4039	30.39	25.9226	32.5097
1995	22.2665	26.7218	30.1706	37.0293	41.321	41.93	35.2645	32.2381	35.3037	35.2458	30.2457	25.069	32.7461
1996	23.1303	27.5617	34.0242	38.547	40.5913	38.8527	35.2426	31.2806	33.542	33.599	30.135	25.9687	32.7064
1997	23.4255	26.9939	31.7587	35.5777	38.6929	37.7493	35.1677	32.3161	33.5643	29.7368	27.1487	20.6835	31.0747
1998	22.6687	25.9243	30.4087	38.4173	41.8145	39.858	34.3061	34.8455	34.0323	32.8765	29.6087	27.2429	32.6916
1999	23.1529	26.7293	33.8074	40.462	41.1448	38.9527	35.5497	33.2497	35.2393	34.6932	31.9123	26.091	33.435
2000	24.6432	25.4179	32.729	40.5467	40.4381	39.9847	34.2139	33.5042	34.5083	37.2858	30.4567	26.2071	33.3379
2001	23.8848	28.3221	33.2777	37.4897	41.0097	37.703	31.9965	32.7732	36.1443	35.9029	31.355	27.0332	33.0849
2002	23.989	26.5689	33.7426	39.4657	42.1448	40.989	36.9506	34.7177	36.0917	36.8971	31.4803	27.4729	34.2413
2003	23.4171	25.6961	32.5129	38.967	41.0855	40.0053	33.4945	32.5174	33.2993	34.4671	30.075	24.991	32.567
2004	23.7106	28.3579	36.6803	40.1637	40.8439	39.704	36.9958	32.3226	35.7357	32.7906	31.1657	26.1765	33.7174
2005	21.9716	25.8011	33.0445	37.3947	40.779	40.9937	34.6771	34.4339	34.0093	34.561	30.7023	24.5445	32.7665
2006	25.099	32.1614	32.0174	39.066	42.4881	39.2347	34.771	31.749	34.5273	35.0068	30.469	25.2848	33.4749
2007	24.4006	27.1686	31.7935	40.136	41.6897	39.6513	34.2277	33.2887	34.3467	34.7739	32.1657	24.5358	33.1938
2008	21.8652	25.5007	35.0713	37.6643	39.4335	36.638	34.4394	32.3081	34.3683	36.2752	30.7597	26.9832	32.6232
2009	24.5955	28.8607	34.5013	38.8183	42.4758	40.6257	35.7248	34.6868	36.282	34.9006	29.1973	25.9052	33.8967
2010	23.9223	28.6039	36.4942	41.349	43.4261	40.6413	35.49	32.5816	32.7357	34.8416	27.8033	23.7903	33.4896
2011	22.4606	26.2986	33.3752	37.714	41.7497	39.3463	34.771	32.4097	32.1943	34.2671	31.3303	25.7723	32.6654
2012	22.35	25.9162	33.1516	37.7293	41.3194	40.3527	36.6081	31.7123	32.71	34.2577	29.847	25.3235	32.6151
2013	23.1619	25.2279	33.0623	37.3387	42.3703	39.6407	34.4532	31.851	34.395	33.1719	28.83	24.8603	32.3928
2014	21.64	25.0308	31.5618	37.9554	40.3339	41.581	36.3181	33.6932	33.5463	35.1743	31.3754	24.5595	32.757
2015	22.3155	28.5563	30.9707	37.4227	42.288	39.3639	33.9516	32.892	35.8924	35.6866	30.504	25.8379	32.9789
2016	25.4243	28.0912	34.1851	39.325	42.42	41.3567	34.5556	31.7448	34.9329	34.5373	31.2511	28.3321	33.8464
2017	22.9523	28.3877	33.3615	40.0442	42.0094	38.6919	33.6967	32.976	35.2079	36.7309	29.8508	25.3923	33.286
2018	25.9463	29.1205	35.0867	39.7039	42.8263	40.0452	34.3874	32.6953	32.7045	35.4762	30.9655	25.1147	33.6862
2019	23.3683	24.9821	30.9686	39.6401	40.7486	41.6595	35.1061	32.3354	33.909	33.3396	28.2075	22.1756	32.2227
2020	21.6304	27.2052	29.8157	37.6518	41.6057	39.9115	36.4954	33.0357	35.024	35.2445	28.8813	25.6026	32.6758
2021	23.3434	29.936	35.3615	38.6409	38.7499	38.6841	35.667	34.0204	32.2155	33.2682	29.5282	23.8408	32.7728
MEAN	23.5658	26.8955	32.6935	38.0378	41.0735	39.7666	34.7133	32.6731	33.9969	34.4873	30.1098	25.3952	32.7986
STDEV	1.12855	1.7182	1.70146	1.42794	1.22797	1.14613	1.31171	1.04561	1.45567	1.43166	1.0788	1.25073	0.613133
CV	4.78893	6.38845	5.20426	3.75399	2.98969	2.88213	3.77868	3.20022	4.28179	4.15127	3.5829	4.92506	1.86939

## Sheet: Banaswara
Row Labels	Jan	Feb	Mar	Apr	May	Jun	Jul	Aug	Sep	Oct	Nov	Dec	Banaswara Max Temp (1951-2021)
1951	25.9174	29.0661	33.4297	35.8193	39.5516	36.4973	33.1574	29.351	34.1917	36.11	32.3153	27.5355	32.7539
1952	28.1035	30.5262	33.4784	38.3267	40.4584	36.135	30.4203	28.4068	31.4737	34.6435	31.235	28.6332	32.6471
1953	25.3368	31.6057	34.9139	37.3917	39.0358	35.613	31.161	28.6826	31.098	33.6339	31.0903	30.0487	32.4601
1954	26.0629	29.8604	33.9145	37.8557	39.6403	35.7513	30.9142	30.4661	28.7863	31.1358	30.543	27.6535	31.8838
1955	26.1735	29.5714	35.7945	36.6827	39.4884	36.1413	32.1616	29.2445	29.9203	30.9639	29.2483	26.9974	31.8721
1956	26.2703	29.2469	34.8081	38.5227	39.7768	35.3703	28.5794	28.4913	30.993	30.5194	28.6157	27.0245	31.5103
1957	25.5397	27.5979	31.9181	37.2393	38.4694	36.7037	30.93	30.1616	31.6837	34.0577	31.739	28.3742	32.0457
1958	27.7974	29.7732	34.6897	39.1833	40.5303	38.3027	30.4032	30.5316	28.8467	31.5016	29.8547	27.6023	32.4219
1959	26.3226	28.9421	35.7477	38.3423	39.8177	36.7483	29.559	28.1668	29.499	31.6035	30.0617	28.0855	31.9132
1960	25.5277	31.8269	32.2874	37.4583	39.7281	36.1847	31.579	28.2113	32.3743	33.7865	30.8783	28.5371	32.3476
1961	26.6152	26.8261	35.3368	37.834	39.6829	35.6107	30.4074	29.731	28.6177	31.0848	29.5867	25.78	31.4476
1962	25.8197	29.5971	33.3229	37.9663	40.249	36.475	31.6187	29.7132	30.0443	31.9765	30.5797	27.3016	32.0568
1963	26.6516	31.3379	34.0468	37.1107	39.4119	36.7747	32.0458	29.1616	30.5137	33.1368	30.7203	27.1187	32.3282
1964	25.44	29.531	35.9723	39.497	39.2661	36.6097	30.9858	29.51	31.2433	34.0581	30.5857	28.0368	32.5569
1965	27.7658	29.4568	33.3361	36.95	38.95	37.3433	31.9252	31.1552	31.91	34.9729	31.9347	27.9565	32.8133
1966	27.5219	31.7804	33.6061	37.7177	39.2903	36.4927	33.4103	29.9126	31.9593	36.1342	31.6267	27.9397	33.1124
1967	26.1219	32.0714	32.3294	37.001	39.8661	35.9347	31.08	28.9523	30.5167	34.4481	31.758	26.3419	32.1853
1968	25.0255	27.2503	33.1597	37.726	39.0945	38.4343	32.0552	28.5794	33.784	34.2084	31.79	28.0232	32.423
1969	26.809	29.465	35.9087	39.014	40.359	37.4137	32.1271	28.6365	31.0313	34.761	31.318	27.5416	32.8733
1970	26.2168	28.3796	33.1455	39.0457	40.8816	34.4507	31.2535	29.82	29.677	33.6203	29.9323	27.6219	32.0196
1971	25.4574	28.7932	33.6061	39.15	38.551	33.6107	29.4226	28.9032	31.5757	31.5929	30.1523	26.7765	31.4643
1972	26.9245	26.1072	35.0716	36.6287	40.0574	37.3537	31.5723	29.3871	32.5207	34.3026	31.2357	27.4745	32.3983
1973	25.7887	29.9625	34.1003	40.09	40.8306	36.0973	29.2258	28.5055	28.529	32.3048	30.306	25.8823	31.7956
1974	26.4597	27.9168	35.6065	38.5183	38.9403	36.295	31.9413	30.3194	33.8043	32.1332	29.6933	26.1423	32.3255
1975	24.7684	27.5836	32.729	38.8617	39.381	35.9713	30.9497	29.5345	29.9403	31.451	29.3187	27.75	31.5303
1976	26.6968	29.1169	33.6245	36.9987	38.6971	34.5383	31.4545	28.4874	30.572	34.6429	30.7313	27.7787	31.9466
1977	25.7926	29.6811	36.2558	37.4053	38.6948	36.247	29.8584	29.0965	30.345	35.2881	31.1987	27.779	32.3087
1978	25.9261	27.6632	32.0274	37.9287	40.5606	36.123	29.4948	28.3723	31.637	33.9132	30.8473	26.1374	31.7261
1979	26.1326	27.0929	32.0335	38.9057	39.139	38.6533	31.6574	29.3771	33.855	34.2445	29.8467	26.9281	32.3323
1980	26.3445	29.6276	33.6116	39.5313	40.7484	35.076	30.7539	29.7561	32.3253	35.6597	31.5973	26.9903	32.6637
1981	25.2316	29.8093	33.0268	38.7353	39.9065	38.3087	30.009	28.4619	32.2673	33.5126	28.4337	26.1306	31.9772
1982	25.5284	26.9336	31.9165	36.6613	37.3319	37.3467	32.6965	29.2471	32.5477	34.9223	28.448	27.6794	31.7897
1983	25.8948	26.7725	32.0448	34.9923	39.2758	37.566	31.8258	29.8503	31.3413	31.5974	29.382	26.2348	31.4151
1984	24.5887	26.4238	34.9342	38.6867	40.6048	36.132	30.9658	28.06	29.982	33.2371	30.7633	28.0558	31.8772
1985	25.929	29.7264	36.3377	37.4357	40.1603	36.9347	32.1603	28.9365	32.4277	31.601	30.692	28.0274	32.5336
1986	26.289	27.5439	33.819	38.5587	39.6187	36.8143	30.6271	29.0632	33.452	34.9087	31.6623	26.0252	32.3746
1987	26.2142	30.0307	34.0539	38.342	39.3197	38.001	34.2881	32.2665	33.5507	35.6219	31.6787	27.4332	33.4059
1988	27.6555	30.6824	33.8513	39.3253	41.1571	37.52	30.5361	29.8558	32.533	32.8232	30.6897	27.5158	32.8335
1989	25.7152	29.1293	33.0006	38.2003	40.7348	35.919	30.9642	29.0594	32.7003	34.8358	31.9007	26.9032	32.4242
1990	29.4574	28.2932	32.5094	38.6593	38.97	35.4547	29.3781	29.2768	30.0007	33.2913	30.3117	26.8739	31.8835
1991	25.4084	29.2154	34.2919	37.2443	40.2158	38.3333	31.8042	29.1229	31.791	34.7923	30.1267	27.3061	32.4769
1992	26.8774	27.1886	33.6913	37.2247	40.0413	39.238	32.7374	29.6348	31.0227	32.3087	29.6383	27.8142	32.2908
1993	27.0819	30.3161	32.5032	38.079	40.8148	37.6223	30.9929	30.7926	31.6583	34.2513	31.3627	28.3603	32.8198
1994	27.1013	28.1407	36.3061	37.1003	40.7058	35.361	29.0142	28.2777	30.042	33.9471	30.3523	27.4471	32.0011
1995	24.501	28.5393	31.7306	37.3763	40.0665	39.465	32.1235	30.0671	33.0683	34.4668	30.8947	27.5174	32.4874
1996	25.3565	29.8386	36.241	38.6393	39.9003	37.727	31.9577	28.5535	30.6413	32.2294	30.023	27.3339	32.3633
1997	25.0452	28.5946	33.7287	35.444	38.1461	33.9857	31.1616	29.4565	30.8507	31.6581	29.6147	23.8623	30.9652
1998	25.1706	28.3354	33.1626	38.889	41.2655	37.6067	31.0442	30.6629	31.055	32.579	29.6677	27.8939	32.2879
1999	25.9316	28.8036	34.6413	40.126	38.9623	34.9883	30.7684	29.8477	31.4613	32.3597	31.4933	27.4126	32.2362
2000	26.9084	27.281	33.3677	39.717	37.6248	36.557	30.5629	31.079	32.5927	36.3232	32.202	29.1774	32.7857
2001	26.4619	30.7029	33.9587	38.4957	39.49	34.2933	28.8081	29.8532	33.975	34.9532	31.3263	28.7629	32.5844
2002	25.7216	29.045	34.7397	39.414	40.5787	37.1603	32.2642	29.3155	31.656	36.1645	32.1003	29.3826	33.1407
2003	27.0584	29.2836	34.5558	38.8843	40.3342	36.709	31.0129	29.7329	29.807	33.439	32.073	27.9019	32.5732
2004	26.3958	30.3241	37.4881	39.2973	39.0719	36.464	32.4606	28.0681	33.2483	32.7645	31.7983	28.0813	32.945
2005	25.0342	28.8861	34.8852	38.3743	40.0161	38.2527	31.4071	30.3477	31.554	33.8577	31.8213	26.9603	32.6209
2006	27.1671	33.4829	33.2471	38.406	40.2561	36.2133	29.9481	27.7926	31.433	33.8335	30.485	27.549	32.4582
2007	27.0316	30.0743	34.1268	40.0647	40.1361	37.1097	30.8323	30.0432	31.901	33.9235	32.3727	26.9974	32.8804
2008	24.9432	27.5448	35.561	38.1557	38.5452	34.4253	31.2097	29.2752	31.7447	35.0361	31.126	29.0771	32.2279
2009	27.3165	31.2875	35.8874	39.1957	40.3206	37.8677	31.6697	31.0148	33.3747	33.4848	29.3633	27.5645	33.1921
2010	26.5616	30.3186	36.6555	40.381	41.9742	38.387	32.1216	30.1942	31.358	34.4648	29.652	25.9161	33.1693
2011	25.9168	29.2511	35.0768	38.5793	39.8048	36.446	31.2994	29.351	30.3527	34.3523	32.04	28.0016	32.5464
2012	24.3332	28.4738	34.3035	38.3303	39.6923	37.3297	31.7903	28.9884	30.612	34.0574	30.3217	27.8577	32.1728
2013	25.3255	28.4486	34.5377	37.4343	40.4094	34.2867	29.0758	28.6203	32.167	31.8584	29.641	26.4319	31.5245
2014	23.7378	26.9484	32.8087	38.3705	39.7779	39.058	32.8494	30.7378	30.7772	34.2853	31.4119	25.9889	32.2434
2015	24.0655	30.0596	32.1648	37.4253	41.2225	36.1159	31.573	30.5331	32.9648	35.3706	31.8553	27.5925	32.5772
2016	27.6992	30.0793	35.2757	38.6963	40.4207	38.1722	30.6933	28.783	32.0272	32.3703	31.2365	28.7601	32.8424
2017	26.0413	30.1131	34.4693	39.1471	40.7355	36.6238	29.7645	30.1808	32.1297	35.0471	30.2354	26.2374	32.5589
2018	27.3332	30.5081	35.3806	39.3733	41.5898	37.3312	30.2208	29.3018	30.9171	35.0955	31.8444	26.0213	32.908
2019	25.232	28.2615	32.8628	39.4011	39.819	38.4261	32.1954	29.0832	29.821	31.0595	29.7501	25.1151	31.7525
2020	23.7207	28.7845	31.3389	38.3034	40.9315	35.4303	33.0566	29.754	32.436	33.9539	29.998	26.8857	32.0455
2021	25.9772	30.9107	35.8288	38.8067	37.9719	35.6159	32.1734	30.3221	30.1932	32.326	29.7406	24.9739	32.0629
MEAN	26.0886	29.1781	34.0863	38.2349	39.8179	36.6416	31.1852	29.4576	31.4465	33.5895	30.7024	27.336	32.3158
STDEV	1.04878	1.47896	1.3954	1.08702	0.912737	1.30782	1.15513	0.873362	1.35955	1.47315	0.991858	1.05985	0.487637
CV	4.02009	5.06874	4.09375	2.843	2.29228	3.56923	3.70409	2.96481	4.32337	4.38575	3.23055	3.87714	1.50897

## Sheet: Bharathpur
Row Labels	Jan	Feb	Mar	Apr	May	Jun	Jul	Aug	Sep	Oct	Nov	Dec	Bharathpur Max Temp (1951-2021)
1951	20.9965	25.3004	30.8316	35.1433	40.829	40.8333	37.9584	33.7777	34.5637	36.2706	30.077	23.2587	32.5165
1952	23.3648	26.6366	30.5545	38.444	41.9645	39.2937	34.7435	32.5187	34.2423	35.0994	29.8583	23.951	32.5566
1953	20.4742	27.3907	34.6316	37.457	40.9574	39.3867	34.0929	33.0384	34.491	34.5629	29.5977	26.1668	32.7029
1954	21.1013	24.625	31.1277	37.759	41.1971	39.603	34.8881	34.2813	33.4933	31.7142	28.9443	23.6755	31.8932
1955	20.7232	25.4896	33.411	36.3593	40.3945	41.1087	35.5406	32.5348	32.892	30.8381	28.394	23.079	31.7493
1956	21.4623	26.261	30.9958	38.609	42.5903	39.206	33.2042	32.9984	34.934	30.641	27.4877	23.1926	31.7931
1957	20.49	24.0121	29.0516	35.9963	39.9961	40.7117	35.1645	34.0152	32.9093	33.5587	29.2993	23.0294	31.5461
1958	23.7284	26.0482	32.4919	39.5947	41.9616	42.669	34.5277	33.3481	32.818	32.1077	28.6737	23.5568	32.6449
1959	20.7932	23.6586	32.6203	37.6203	40.8484	41.072	34.3342	33.291	33.6367	33.2297	28.404	24.4406	32.0293
1960	21.909	28.8493	29.8168	36.6213	42.0271	41.546	34.7503	32.6561	34.632	32.6365	28.535	24.4684	32.3575
1961	21.2526	22.265	31.7965	37.4183	41.1074	39.868	34.9765	32.7403	33.6683	31.6471	26.5783	20.3574	31.177
1962	21.0594	24.6986	30.4748	38.159	41.4165	41.4747	36.6	33.8116	32.9663	32.8081	28.972	23.2977	32.1705
1963	21.7971	27.3861	31.1977	36.686	40.3119	40.2953	36.5142	32.7784	33.4173	34.1006	29.229	23.3174	32.2635
1964	20.6958	25.39	33.7648	38.9527	39.9365	41.2203	34.0403	34.0223	32.671	33.8465	28.7243	23.3784	32.2229
1965	23.4174	25.3975	30.5458	35.1227	40.61	42.7143	36.1742	34.7126	34.8227	34.2403	30.2393	23.8161	32.677
1966	23.909	27.68	32.0077	38.0953	41.5497	39.472	37.3881	33.1268	34.7387	35.019	29.018	23.6668	32.9902
1967	21.9987	28.0171	29.1094	36.38	41.2361	41.3787	35.0597	32.3203	33.1303	33.7923	28.2923	21.73	31.87
1968	19.7681	23.0845	30.7029	37.128	41.1387	40.8323	34.3965	33.959	36.366	33.7868	29.6327	23.9932	32.0719
1969	22.7277	26.4986	34.4587	38.4553	39.7858	42.278	34.9797	33.7861	33.3753	34.7429	29.6587	24.2123	32.9328
1970	22.4358	23.3146	30.0419	39.1603	41.7823	38.821	37.0048	33.6842	33.6907	34.2113	29.1303	24.8542	32.3872
1971	21.1461	25.6414	31.411	38.0073	38.5942	36.975	33.3052	31.6742	33.6753	32.6629	28.3707	23.6039	31.2688
1972	22.4681	22.8486	32.0274	36.7547	42.4706	42.2287	36.8642	33.3155	33.7777	33.6155	29.5383	23.6848	32.4848
1973	21.671	26.13	31.0697	39.782	42.071	40.4337	35.9677	32.7387	33.8613	32.7226	29.0007	20.7813	32.1963
1974	21.9274	24.1507	32.8874	39.2497	40.9523	40.405	34.5684	33.5274	36.3563	33.6955	29.3467	21.8997	32.4388
1975	20.2045	23.5268	30.8165	38.076	41.649	37.922	34.1058	32.7361	31.62	32.6523	27.952	24.2787	31.3304
1976	22.7687	24.5583	30.069	36.3697	40.2513	38.1553	35.3177	32.011	33.716	34.9384	28.9717	23.6619	31.7435
1977	21.6652	25.4814	34.0884	36.4883	38.5584	39.5663	31.9745	33.1845	31.9737	33.8129	30.4287	24.711	31.8494
1978	22.0732	23.1171	28.5477	37.2733	43.8526	39.6173	33.4855	32.3584	33.3577	34.7703	29.457	23.63	31.832
1979	22.3542	22.9707	28.8842	38.4623	39.7935	41.2907	35.8026	35.6323	36.6963	35.7739	29.5907	23.9481	32.6362
1980	21.8523	26.5307	29.96	39.7833	43.2639	39.173	33.3065	34.0084	35.1107	34.961	29.024	23.1742	32.5094
1981	21.629	25.7821	29.4674	38.1767	41.1732	42.2133	33.4529	34.1616	36.4107	34.3832	27.137	23.4835	32.3022
1982	21.3932	22.1171	27.2248	35.7757	36.8329	40.5383	37.6952	33.24	35.7397	34.1806	28.4647	23.6816	31.4425
1983	20.7542	23.3207	29.9835	33.5957	38.2219	39.7507	35.1226	33.061	34.0003	32.7439	28.5553	23.23	31.0594
1984	21.2981	23.1052	32.9719	38.2273	43.2361	40.2873	34.7232	33.2961	33.0337	33.4461	29.0023	24.1123	32.2464
1985	20.3065	25.9754	33.4139	37.9543	42.3945	40.8483	34.5287	33.6074	33.296	31.0777	29.3647	23.5645	32.2107
1986	21.4774	23.2954	30.5652	37.798	39.4116	40.032	34.1384	34.6023	35.9567	33.3139	30.0903	22.5606	31.9636
1987	22.1816	27.0132	31.9123	38.709	38.1961	42.5047	39.8913	37.3516	36.6937	35.6394	30.4407	24.0645	33.7347
1988	23.2355	26.8855	31.3213	39.5307	43.4645	39.9123	33.8397	32.64	35.535	34.1681	29.448	24.1877	32.8443
1989	20.7603	24.8636	30.4874	36.7007	42.2106	39.51	36.5152	34.7029	34.641	35.1174	29.526	22.0548	32.2872
1990	23.6768	23.5907	29.0994	37.6127	39.9484	40.7547	33.7587	34.1335	33.2753	33.4835	29.2537	23.8406	31.9003
1991	21.3268	25.4886	31.3277	36.928	41.7435	40.8103	38.4987	33.7735	34.5553	34.2713	28.361	23.1313	32.5468
1992	21.7158	23.1117	30.8465	37.043	40.3832	41.9757	35.4265	32.9652	33.6493	33.0987	28.6307	24.5932	31.9648
1993	21.2594	26.6789	28.8471	37.6187	42.479	40.6703	35.0516	35.7903	32.47	34.4113	29.775	24.7006	32.4979
1994	22.4635	24.6539	33.1355	36.6187	42.3561	41.35	33.9555	33.0323	34.4567	34.4184	29.8513	24.6716	32.6127
1995	20.2942	25.1421	29.7219	37.2577	42.08	42.7463	36.3319	32.3645	34.5553	34.9506	29.5273	23.5819	32.3991
1996	21.5532	25.2879	31.8432	38.3463	41.1577	38.3033	35.4461	32.4303	33.507	32.9368	29.4123	24.0458	32.028
1997	21.5103	25.0446	30.2845	35.2327	39.2377	38.1673	35.7729	33.1097	34.2003	29.4768	26.105	17.86	30.5129
1998	20.7329	24.5954	28.6313	37.753	42.4584	40.3123	34.6365	33.9423	34.3693	32.2929	28.746	23.55	31.8566
1999	19.199	25.1232	33.0674	40.6417	41.4048	39.6157	36.4487	34.8068	33.7593	33.4339	30.2997	23.8668	32.663
2000	20.9739	23.2652	30.9345	39.731	40.8903	38.1913	34.2771	34.1603	34.8597	35.551	29.7957	24.3342	32.259
2001	20.479	25.9007	31.7713	37.4257	40.5316	37.091	34.43	34.3374	36.5533	34.6561	29.998	24.041	32.2874
2002	21.0739	24.2586	31.9471	39.4833	42.2155	40.3097	39.5603	34.7371	33.4567	34.4368	29.381	24.6758	33.0033
2003	18.0258	23.7839	30.8039	38.8707	41.0048	41.0547	34.3261	33.5374	32.6533	33.5877	28.8247	21.5397	31.5223
2004	18.5939	25.8621	34.7774	39.3467	40.4097	38.8467	37.3868	33.0965	35.1953	31.2323	29.0927	23.11	32.2438
2005	20.1481	24.1014	31.6839	36.8633	40.9603	41.568	33.6316	35.3265	33.8363	33.3426	28.56	22.5003	31.9043
2006	22.9768	30.3179	30.7845	38.7313	41.1194	38.646	34.5958	34.3394	35.1683	34.4803	29.453	23.631	32.8455
2007	22.45	24.7282	29.7655	39.5637	40.509	39.1143	35.0277	34.0632	34.3377	34.0974	29.7617	22.8506	32.212
2008	20.899	24.4352	33.9339	38.1263	38.9968	35.2693	33.9774	33.5158	34.2057	34.8239	29.6833	24.8623	31.9083
2009	22.4303	27.0232	32.7474	38.726	41.2965	42.02	36.3861	35.5529	35.0863	33.3619	27.9453	23.8723	33.0549
2010	19.4684	26.3521	34.9842	41.671	42.7668	41.2997	35.871	33.4645	32.4903	33.7081	27.7547	22.7265	32.7315
2011	19.4081	24.8093	31.5903	37.2653	41.4061	37.8893	34.2655	33.2823	33.6057	33.99	29.9087	23.6287	31.7793
2012	19.89	24.6193	31.7997	37.4463	41.7119	42.025	36.2403	32.6229	33.6533	33.5787	28.8183	22.841	32.1078
2013	20.0174	23.4457	31.5332	37.2933	42.5632	38.4567	34.6442	33.0074	34.9487	32.3561	28.009	23.1232	31.6501
2014	18.6467	22.7489	29.5441	36.8388	40.1018	41.9697	36.6704	35.5139	34.8039	34.1331	30.1821	21.5342	31.9213
2015	18.1876	26.4402	29.1323	36.0308	42.1271	39.7572	34.6897	34.5447	36.5371	35.1876	29.783	23.8676	32.2011
2016	22.3339	26.4668	32.7946	39.8398	41.3193	40.5568	34.2285	33.4406	35.106	34.6527	30.1868	24.7111	32.9675
2017	21.2889	26.6363	31.72	40.0446	41.4809	38.9744	34.6509	34.2961	35.3668	35.7288	28.522	23.8913	32.7338
2018	22.2037	26.8221	33.6953	38.5415	41.6522	40.3223	35.1335	33.6955	32.8838	34.1839	29.2097	23.1347	32.6422
2019	21.2246	23.0588	29.2634	38.5521	40.8281	41.6423	35.4135	33.7604	34.1107	32.7305	28.2716	18.7886	31.4938
2020	19.4794	24.8557	28.4118	36.4468	40.2262	39.3194	36.4377	33.8543	36.1766	34.9041	27.7074	23.1232	31.7482
2021	20.2046	27.859	33.4988	38.6221	38.1308	39.0681	36.4855	34.5769	33.1534	32.9958	28.2519	22.1076	32.0847
MEAN	21.2593	25.1525	31.277	37.8365	41.0385	40.1866	35.2761	33.6665	34.2239	33.7045	29.0355	23.359	32.1862
STDEV	1.29177	1.6623	1.7347	1.42642	1.35726	1.51004	1.46899	0.994394	1.19911	1.30496	0.874554	1.30013	0.538375
CV	6.07625	6.60891	5.54625	3.76996	3.30727	3.75758	4.16428	2.95366	3.50371	3.87175	3.01202	5.56584	1.67269

## Sheet: Bikaner
Row Labels	Jan	Feb	Mar	Apr	May	Jun	Jul	Aug	Sep	Oct	Nov	Dec	Bikaner Max Temp (1951-2021)
1951	22.0181	25.7754	30.72	34.683	40.5377	40.43	38.8868	34.869	37.3827	37.839	30.524	24.3419	33.1997
1952	24.1339	26.6366	30.96	38.5207	41.7058	40.3367	36.3845	34.0348	35.6913	35.7381	30.4477	24.5984	33.2693
1953	21.6923	27.8071	34.8513	37.0057	40.5565	39.9167	35.8839	33.5955	34.6777	35.2787	30.3477	27.7065	33.2973
1954	21.7461	24.6771	31.1503	37.209	40.8106	40.2257	36.0781	36.4023	34.7773	32.821	29.8093	24.8335	32.5773
1955	21.4468	26.6671	33.2961	35.7797	39.3968	41.6003	38.1113	34.0094	33.665	32.1877	28.9427	23.9819	32.4428
1956	22.2548	26.7431	30.7881	37.6977	43.1229	40.0217	33.8019	33.1494	36.093	31.4213	28.48	24.1652	32.3064
1957	20.3552	24.3889	29.5568	35.3503	38.5284	40.7943	37.2923	35.491	34.733	34.7584	29.955	23.2355	32.0647
1958	24.6258	26.4607	32.7206	39.616	41.2326	42.3497	36.0545	36.4294	32.7173	33.5135	29.4223	24.1239	33.298
1959	21.51	24.4904	33.561	37.642	40.8339	41.7493	36.2377	34.2287	33.598	34.7606	28.995	24.7558	32.7336
1960	22.4529	29.4769	29.8877	36.1223	41.5181	41.601	36.4265	34.3006	36.9553	34.9423	29.712	25.1032	33.197
1961	22.6145	22.5629	32.5752	36.341	40.6139	39.5527	36.4561	34.4332	34.2133	34.0974	27.7593	22.5087	32.0275
1962	22.0023	25.9154	31.091	37.8913	41.3726	40.812	37.1981	35.8445	34.0757	33.9997	29.348	23.5371	32.7831
1963	23.4961	28.1146	31.1584	36.1177	39.7716	41.092	38.9542	35.0961	35.124	35.6565	29.424	24.2468	33.2047
1964	20.2403	25.4855	33.9852	38.6827	40.4568	40.7483	35.5787	34.7871	34.7053	34.9745	29.561	23.9752	32.7703
1965	24.7742	26.2061	31.2294	34.1877	39.6906	41.4773	36.669	35.5339	36.4397	35.9061	31.4013	24.3884	33.186
1966	25.1194	28.2518	31.5765	37.069	41.0435	39.8617	38.5094	34.6777	35.1123	36.0816	29.1307	24.5055	33.4334
1967	22.2523	28.6104	29.4523	35.7537	40.8132	41.0573	36.8535	34.091	34.5077	34.5384	29.2853	22.0868	32.4436
1968	20.7655	23.1193	30.9168	37.0877	40.09	41.7753	36.9245	35.9852	38.1063	35.4577	30.9957	24.9768	33.0274
1969	23.2055	26.0875	34.6184	37.531	39.7071	42.0517	38.3726	35.87	36.112	36.0742	30.789	26.4332	33.9388
1970	23.0845	24.7964	30.66	39.122	42.5777	40.2747	37.4548	34.4477	34.5257	35.4061	29.9093	25.6461	33.1968
1971	22.2094	27.1757	32.2345	39.0707	39.0419	38.734	35.5365	34.2116	35.7857	35.1723	30.5343	25.9755	32.9876
1972	23.7565	22.8414	32.3026	36.122	41.4877	41.393	37.3403	34.8494	36.0157	35.1797	30.6043	24.1484	33.0258
1973	22.1961	27.1036	31.2719	39.187	41.8665	40.1653	37.0503	33.9013	35.1143	34.6365	30.087	21.8906	32.8842
1974	22.8635	24.1011	33.8481	38.697	40.9477	39.247	36.961	37.1103	37.9317	35.0587	29.9723	22.4174	33.3032
1975	20.8835	23.8786	30.8765	37.5597	41.4345	39.261	35.0394	34.2858	32.89	33.6484	29.0883	25.7868	32.0909
1976	23.3671	24.7738	30.0835	36.19	40.3919	39.1793	36.8968	33.2568	33.8443	35.1058	29.9377	24.0287	32.2678
1977	22.1658	26.6682	34.6771	36.6623	39.2916	38.9487	33.9681	34.4116	33.4077	35.6974	31.484	25.4668	32.7612
1978	23.1261	23.8875	29.2358	37.5207	43.6403	40.8223	33.6439	34.4406	34.9537	35.8819	29.8093	25.6103	32.7534
1979	22.9245	23.7707	28.6542	38.3857	39.1813	42.3067	37.4403	35.7484	36.2187	34.8832	29.6857	24.7123	32.8585
1980	22.5719	27.1672	29.9123	39.065	42.5932	41.6347	35.9361	36.4674	37.0543	36.0516	29.5877	23.919	33.4948
1981	22.4239	26.3714	29.6806	38.564	41.7035	42.8907	35.6503	35.9623	37.3533	35.3223	27.7757	24.6461	33.2136
1982	22.1258	22.485	27.4419	35.5777	37.1029	40.926	38.6342	35.1116	37.199	35.5939	28.8953	24.1242	32.1416
1983	22.4926	24.18	29.7245	33.125	39.0335	40.1047	36.1932	34.3742	35.7487	34.5881	30.2963	24.5468	32.068
1984	21.8648	23.8283	34.0371	38.1393	43.6861	41.2237	36.4329	35.1542	34.09	34.8994	30.56	25.5339	33.3095
1985	22.4768	28.2968	35.41	37.6133	42.6184	40.67	35.9887	35.2316	36.5893	34.1126	31.046	25.0597	33.7745
1986	22.6829	24.1025	31.3219	38.1883	40.6748	40.932	36.5677	35.2777	36.9627	35.4787	31.0017	23.2587	33.07
1987	23.2903	27.7186	31.8965	38.4443	38.2455	41.7143	39.8955	38.6858	38.79	37.2732	31.899	25.2223	34.442
1988	24.4035	27.8145	31.219	39.5943	43.7361	41.8043	35.7861	34.9916	36.3103	35.1223	30.7297	25.6806	33.9314
1989	22.1168	25.5679	31.1426	36.5823	41.7965	39.878	37.1006	35.67	36.5127	35.9848	30.73	23.6997	33.0954
1990	25.0406	24.1621	29.3155	37.239	40.9003	40.7697	35.4623	35.1529	34.8277	34.5523	30.4243	25.0074	32.7746
1991	22.2561	25.34	31.0939	36.122	41.0406	41.4553	39.7865	35.68	35.475	35.0742	29.462	25.109	33.1951
1992	22.721	23.8272	30.3587	35.9513	40.7861	42.7977	36.5581	34.201	34.0863	34.1742	29.7107	26.16	32.626
1993	22.5177	27.9446	29.4113	37.4483	42.8152	41.3227	35.9645	37.5223	34.9917	36.0403	31.3127	26.7129	33.6855
1994	23.2961	25.1679	33.5642	36.2877	42.3684	41.7717	34.8645	33.7574	34.4057	35.0597	30.6997	25.2581	33.0763
1995	21.3029	25.4607	29.5171	36.444	41.8455	42.89	37.4471	33.7439	36.1203	35.8468	30.3187	24.4758	32.9744
1996	22.6177	26.3124	32.4952	38.1177	40.5274	38.5413	37.059	33.9403	35.369	34.3448	30.19	25.3865	32.9156
1997	22.831	26.2457	30.5487	35.1493	38.6235	38.591	37.5152	34.5671	35.7197	29.6323	26.701	19.4774	31.3117
1998	21.9213	24.8846	29.0823	38.1263	41.9403	40.8813	36.5477	37.431	35.5763	33.4677	29.693	25.6826	32.9681
1999	21.0158	25.7521	32.9584	40.641	41.5316	40.053	37.9232	35.9768	37.3683	36.0032	31.727	25.8197	33.9256
2000	22.7255	23.7979	31.5284	40.3153	40.9597	40.6407	36.3194	36.0106	36.449	37.9703	30.1507	25.8071	33.5731
2001	22.5455	27.4361	32.56	37.094	41.1668	38.3263	34.5806	35.1877	37.5533	36.8977	31.3687	26.0194	33.4142
2002	23.0194	25.6243	32.9345	39.5077	42.5913	41.876	39.5252	37.9077	37.0427	36.9126	30.8373	26.3694	34.5547
2003	21.1526	24.65	31.3019	38.4897	40.939	41.3393	35.0406	34.89	35.318	34.9132	29.4143	23.6306	32.6163
2004	21.781	27.339	35.6697	39.8303	40.4958	39.9187	39.5403	35.1642	37.2153	32.9868	30.8957	24.9435	33.816
2005	20.74	23.6975	31.3568	36.9063	40.2058	41.7787	36.7206	37.3955	35.7233	35.4542	30.5727	23.979	32.9161
2006	23.8639	31.3325	31.0632	38.793	42.5374	39.934	37.3665	35.1639	36.2927	35.4997	30.141	23.7206	33.8022
2007	23.15	25.6825	30.2681	39.9473	41.4632	40.2103	37.1552	35.9177	35.7027	35.2668	31.8733	23.671	33.3829
2008	21.1255	25.0259	34.9513	37.4857	39.5565	38.059	37.2155	34.7194	35.817	36.6958	31.0517	25.8361	33.1455
2009	23.551	27.7336	33.2113	38.3397	42.5248	41.784	37.9358	37.2339	37.286	35.6774	29.1177	25.2781	34.1648
2010	22.1519	27.3561	35.7452	41.3757	43.3039	40.9233	37.1413	34.6329	34.14	35.1826	28.54	23.1	33.6557
2011	20.8665	25.1686	32.2316	37.0193	41.85	40.2173	37.039	34.6435	33.45	34.8603	31.2123	24.9255	32.8236
2012	21.5071	24.7597	32.1132	36.9697	41.5345	41.398	38.9984	34.2406	34.226	34.5452	29.7657	24.0323	32.855
2013	21.9445	24.1954	31.999	36.884	42.5852	40.9223	37.2913	34.4623	36.1623	34.5452	29.0177	24.3726	32.9048
2014	21.2852	24.1694	30.2113	37.0713	39.8849	42.1024	38.2164	36.3627	35.1431	35.4986	31.0937	23.4105	32.9042
2015	20.9902	27.4445	29.7315	36.893	42.1273	40.1192	35.8054	35.1073	37.2835	36.0973	30.1144	25.0693	33.0782
2016	23.8738	27.2751	33.0384	39.1078	42.5515	42.2558	36.9685	34.2999	36.5845	35.6978	31.2907	27.6434	34.2197
2017	21.6898	27.7571	32.4856	39.8765	42.0837	39.1695	36.067	35.576	36.9376	37.5012	29.5513	24.8819	33.6496
2018	24.7973	28.3347	34.3369	39.3698	42.7167	40.7024	36.6906	35.3502	34.7674	35.8016	30.7447	24.5453	34.0337
2019	22.2433	23.5988	29.6273	39.1307	40.5611	42.7101	37.3932	35.1843	36.3757	34.2016	27.4627	20.7368	32.4644
2020	20.3059	26.2696	28.5067	37.065	41.3043	40.787	38.101	35.5018	36.825	35.995	28.5386	24.3906	32.8021
2021	21.8222	29.2538	34.271	38.3179	39.3498	39.7808	37.8243	36.7042	33.9952	34.1484	29.985	23.4386	33.2487
MEAN	22.428	25.8733	31.6509	37.6199	41.0919	40.7548	36.8768	35.2119	35.6368	35.0942	30.0133	24.5601
STDEV	1.14372	1.82278	1.89178	1.56515	1.38009	1.13876	1.33671	1.13197	1.34125	1.3363	1.04753	1.37441
CV	5.09953	7.04503	5.977	4.16043	3.35853	2.79418	3.6248	3.21472	3.76367	3.80774	3.49024	5.59612

## Sheet: Jaisalmer
Row Labels	Jan	Feb	Mar	Apr	May	Jun	Jul	Aug	Sep	Oct	Nov	Dec	Jaisalmer Max Temp (1951-2021)
1951	23.5745	26.9771	31.7726	35.1023	39.571	38.1143	36.4739	32.3316	35.976	37.3171	31.5783	26.3387	32.9514
1952	26.0616	28.0207	32.0274	37.7633	40.6281	38.389	33.5406	31.5671	34.3653	35.3	30.7783	25.9755	32.8677
1953	23.4755	29.2807	34.2429	36.6437	39.0513	37.969	34.369	31.1655	32.8293	34.7274	31.0107	28.8855	32.8133
1954	23.5923	26.9975	32.1306	37.1527	39.8784	38.095	34.1206	33.5255	32.6803	32.8855	30.6793	26.3577	32.3599
1955	23.4745	28.0654	34.2771	35.8787	39.3697	38.5327	35.6932	32.2374	32.3683	32.9961	29.448	25.6994	32.353
1956	23.9803	27.5334	32.5939	37.5823	40.8165	37.468	31.3171	30.7558	33.6087	31.7019	29.3837	25.8526	31.8779
1957	22.51	25.8636	30.6977	36.0143	37.9135	38.2197	34.609	33.4232	33.7367	34.8658	31.1703	25.7397	32.0848
1958	26.1061	27.9961	33.4377	38.8677	40.6029	40.049	33.8816	34.8229	31.2863	33.3013	30.2613	26.0506	33.0743
1959	23.5168	26.6696	34.7006	37.9247	40.0877	38.9563	33.3532	31.3597	31.34	33.7671	29.8403	26.2435	32.3356
1960	24.3758	30.79	30.6735	36.5063	40.13	38.684	34.4832	32.0248	35.51	35.5839	31.183	26.8835	33.0552
1961	24.52	24.7868	34.0832	36.436	39.7594	37.174	33.6745	32.8716	31.675	33.7506	29.4033	25.0497	31.9717
1962	24.1258	27.9921	32.4097	37.9037	40.8284	38.3627	35.121	33.421	33.297	34.2303	30.8133	25.8361	32.8773
1963	25.7439	29.8193	32.5942	36.3297	39.2677	38.7497	36.4832	33.5574	33.5503	35.4035	30.3587	26.5806	33.2141
1964	22.4606	27.2886	34.909	38.8783	39.9216	38.1117	34.2765	32.7694	33.7213	35.1294	30.7767	26.3781	32.8885
1965	26.6439	28.0596	32.1781	35.1933	39.2323	38.8563	34.4442	33.5123	34.739	36.1074	32.167	26.0271	33.1146
1966	26.4861	30.0832	32.1639	36.933	40.0187	38.0323	36.1484	33.2761	34.3113	36.9952	30.7793	26.2184	33.4644
1967	23.7329	30.0204	30.9994	36.0187	40.1048	38.3413	34.5394	32.2561	33.343	35.1819	31.0827	24.3848	32.4968
1968	22.9665	25.1269	32.1384	37.2983	39.1942	39.9697	35.9684	33.1413	36.0387	35.9465	32.235	26.5713	33.0564
1969	25.1574	27.7768	35.6629	38.7293	40.6732	40.0013	36.9039	33.4261	36.176	37.1103	32.2693	28.3487	34.3802
1970	25.4419	27.1871	31.9829	39.2077	42.0406	38.944	35.2203	33.2581	32.5757	34.9587	30.927	26.8461	33.2413
1971	24.1039	28.4771	33.38	39.79	39.0068	36.4213	33.6755	32.8019	35.287	34.4226	31.666	27.8255	33.0794
1972	25.7255	23.8469	33.7271	36.3507	40.049	39.229	34.1932	33.2042	34.791	35.6803	31.5957	25.9687	32.884
1973	23.5306	28.9011	33.1723	39.6323	41.4177	38.1447	34.5216	31.9868	33.0707	35.0577	30.965	24.5755	32.9198
1974	24.9897	25.4643	35.0316	38.114	39.8668	37.9653	36.3355	35.3684	36.9103	35.4171	30.5523	24.9006	33.4478
1975	23.0552	25.8004	31.6681	38.2187	40.3916	38.1307	33.9806	32.8987	31.957	32.5184	29.6283	27.3929	32.1631
1976	25.0465	26.7138	31.8365	36.3833	39.5745	38.5773	35.011	31.7461	32.2737	35.4281	30.9503	26.6703	32.5272
1977	24.2813	28.8261	35.9526	37.5487	39.7429	38.1357	32.8074	32.5642	33.5293	37.1961	32.556	27.7019	33.4188
1978	24.9506	26.6921	31.4894	38.1833	41.4919	38.712	32.1481	32.5065	33.913	35.9758	30.9333	27.3739	32.8867
1979	24.5506	26.0011	30.7652	38.5293	39.0887	40.8427	35.5555	32.9071	35.3833	34.4155	30.1143	25.8939	32.8564
1980	24.3403	28.8555	32.2158	39.921	41.1742	39.7753	34.6829	34.2661	36.0237	36.5006	31.0877	25.9368	33.7258
1981	24.5535	28.6307	32.2535	38.884	40.5284	40.347	34.1655	32.949	35.3603	35.3342	28.4073	25.9894	33.1249
1982	24.2423	25.6514	30.84	36.6263	37.921	39.2097	36.2694	33.1174	35.7307	36.6606	29.6807	26.4387	32.7283
1983	24.4223	25.98	31.0484	34.3657	39.3516	39.5093	35.7761	32.9074	34.6487	34.6213	30.6663	25.9668	32.4659
1984	23.5148	25.4393	34.771	38.7103	41.3423	38.319	34.2484	32.0006	33.024	34.8045	31.165	26.7852	32.8573
1985	23.5216	29.0518	35.6281	37.2453	41.0352	38.0223	34.1145	32.6403	35.439	34.9348	31.869	26.7074	33.361
1986	24.4803	26.2679	32.8619	38.2517	40.5677	39.0363	34.8413	32.4794	35.438	36.2265	31.671	25.0032	33.1169
1987	25.5648	28.9886	33.2887	38.45	38.931	40.0543	37.4268	36.9935	36.5237	37.7771	32.776	26.5645	34.4623
1988	26.0784	29.2703	32.6113	39.6067	41.8303	40.15	34.5684	33.3823	36.0357	35.4187	31.7867	27.3742	34.0038
1989	24.1297	27.6182	32.7277	37.665	41.2381	38.0493	35.1132	33.3335	35.0213	36.0606	32.152	25.831	33.2641
1990	27.7542	26.6829	31.1919	37.8397	40.2645	38.5963	33.8858	32.78	33.3673	34.8284	31.2613	26.8406	32.967
1991	24.4119	27.6436	32.8329	36.7647	39.6481	40.4597	36.9613	34.029	34.0557	35.8919	30.806	27.5061	33.442
1992	25.1597	26.1003	31.7742	36.0457	40.29	41.0827	35.3219	32.7913	32.8063	34.2623	30.77	28.0439	32.8825
1993	25.3913	30.1164	31.6445	37.3833	41.0255	39.744	34.829	35.3803	35.235	36.3384	32.169	28.4219	33.9813
1994	25.6019	27.235	35.7048	36.9053	41.0219	39.1783	32.8319	31.2342	32.2607	35.3626	31.7393	26.8068	33.0153
1995	23.6239	27.8325	30.9423	37.059	40.7139	41.081	35.7661	33.4497	36.0687	36.0994	31.268	26.39	33.3703
1996	24.4968	28.6848	35.3065	38.5247	39.8668	38.597	35.5981	32.5881	34.9143	35.3635	30.9557	27.3755	33.5248
1997	25.059	28.7096	32.7784	35.7943	38.5539	36.7	35.7303	33.2826	33.8833	31.8445	29.0327	23.4242	32.0741
1998	24.4803	27.2464	32.4739	38.6703	41.5574	39.6783	35.0187	35.7165	35.021	34.2261	30.6893	28.4526	33.6284
1999	24.3035	27.8189	34.0468	40.1177	39.4523	37.4457	35.6916	33.3687	36.2853	35.7987	32.8197	28.0635	33.7848
2000	26.1113	26.9617	33.4045	40.043	39.9487	39.2267	34.5548	34.1861	35.1717	37.979	31.8657	28.2474	33.9849
2001	25.111	29.5846	33.8306	37.7797	40.1732	36.947	32.2894	33.0519	36.2467	37.0455	32.4087	28.3548	33.5764
2002	25.1345	27.8068	34.4658	38.954	41.43	39.8003	35.4084	34.5106	35.7983	37.9403	32.241	28.271	34.3408
2003	25.3984	27.3554	33.2281	38.4603	40.3048	38.8497	33.6339	33.0045	33.882	35.9955	30.8093	26.3806	33.1296
2004	25.05	29.4421	36.9371	39.2607	39.9419	38.7433	36.7355	33.4971	35.8657	33.6606	32.0917	27.44	34.0541
2005	23.0077	26.4425	33.3487	37.519	40.0316	39.908	35.8974	34.1229	34.984	35.2545	31.8613	25.7981	33.2051
2006	25.749	32.7671	32.7703	38.427	41.0706	39.1687	35.5516	31.5397	34.2247	35.1984	31.01	25.6329	33.5761
2007	24.9352	28.3836	32.2758	39.544	40.3345	38.7507	34.8842	33.7397	35.232	35.4877	33.1243	25.5261	33.5259
2008	23.4061	26.8152	35.8177	37.7793	38.7535	37.0573	35.1542	32.4606	35.2513	36.6494	31.7203	26.9468	33.1605
2009	25.4942	29.8189	34.7271	38.91	41.3058	39.1467	35.5335	34.3403	36.246	35.9603	30.8517	27.2481	34.1437
2010	25.7539	29.3854	36.4777	40.4587	42.411	39.542	35.3871	33.1052	33.6283	35.9158	29.039	25.3045	33.8845
2011	24.6097	27.8407	34.8287	38.3533	40.1539	39.3923	35.9068	33.3245	32.025	34.8248	32.146	26.8939	33.3804
2012	23.4516	26.3831	33.7023	37.7227	40.4052	38.89	36.1755	33.2723	33.1213	35.1303	30.9253	26.6323	32.9966
2013	24.9461	27.2714	34.151	37.2133	41.0284	38.8123	34.8419	32.8839	35.0813	34.3381	30.3657	26.2255	33.1196
2014	23.6753	26.9002	32.9151	38.5468	40.099	40.3348	36.4435	34.3249	33.8843	36.3692	32.4478	26.6314	33.5721
2015	24.7434	29.5228	32.4151	38.4254	41.5772	39.1793	34.8157	33.5964	35.6249	36.1076	31.1925	27.1896	33.7071
2016	26.7454	29.7182	34.7665	38.4498	41.4701	40.3093	35.7857	32.8856	35.3333	34.9134	32.4141	29.9702	34.398
2017	24.5624	29.8432	34.4288	39.5459	41.3238	38.915	33.6191	33.7051	35.2102	37.5736	31.2341	26.7622	33.9014
2018	27.4858	30.615	35.8518	39.8212	42.3719	39.5157	35.1529	33.3419	34.8721	37.4708	32.9418	26.8924	34.705
2019	25.2598	26.6712	32.5175	39.8287	40.1576	40.5074	36.8503	33.4539	34.7398	34.1475	28.6652	24.9295	33.1666
2020	22.9304	29.1764	31.1809	38.8363	41.5122	39.7667	36.9252	33.9394	35.144	35.6208	30.0331	26.9051	33.4944
2021	25.0903	31.1785	36.248	39.2663	39.2139	38.3746	35.7905	35.2046	33.7173	34.2641	31.0535	25.5164	33.7439
MEAN	24.6755	27.8981	33.2385	37.9309	40.2965	38.9205	34.9722	33.1953	34.4038	35.3461	31.1031	26.5943
STDEV	1.11814	1.66424	1.60335	1.3444	0.976436	1.02237	1.22282	1.08658	1.38829	1.34405	1.04166	1.1325
CV	4.53137	5.96543	4.82379	3.54435	2.42313	2.62682	3.49655	3.2733	4.03527	3.80253	3.34906	4.25843

## Sheet: Jalore
Row Labels	Jan	Feb	Mar	Apr	May	Jun	Jul	Aug	Sep	Oct	Nov	Dec	Jalore Max Temp (1951-2021)
1951	24.1245	27.4057	32.0694	34.911	39.1461	37.155	35.1319	30.791	35.2053	36.8948	31.4077	26.4806	32.5795
1952	26.5597	28.5979	32.4413	37.6147	40.2219	37.372	32.0113	30.0374	33.2603	34.8094	30.7573	26.4855	32.511
1953	23.779	29.8061	34.7726	36.5003	38.8129	36.9443	33.0013	30.0313	32.0617	34.3242	30.9487	29.4648	32.5424
1954	24.291	27.5261	32.5306	36.9303	39.5206	37.236	32.6806	32.2094	31.4753	32.0316	30.49	26.7381	31.9856
1955	23.9452	28.32	34.6916	35.5077	38.7255	37.7343	34.1948	30.8829	31.265	31.9623	29.2347	26.0345	31.887
1956	24.4832	27.8817	32.8681	37.34	40.6045	36.492	30.019	29.4723	32.6577	30.8316	28.9577	26.159	31.4742
1957	22.9484	26.2975	30.9029	35.814	37.5271	37.5843	33.3568	32.1252	32.8347	34.431	31.3223	26.2161	31.7965
1958	26.5581	28.4636	33.9058	38.935	40.1623	39.321	32.2297	33.1013	29.9853	32.6358	29.9903	26.4229	32.6559
1959	24.1716	27.1068	35.0519	37.5643	39.4535	37.9773	32.0274	29.9419	30.517	33.3419	29.7983	26.8545	32.0023
1960	24.7794	31.2486	31.2306	36.0813	39.6361	37.7117	33.0381	30.271	34.3567	34.7455	30.7873	27.1561	32.5707
1961	24.7813	25.0021	34.2403	36.1647	39.2787	36.359	32.46	31.4829	30.5533	32.9584	29.113	25.0626	31.4903
1962	24.6784	28.3111	32.6145	37.6017	40.2826	37.423	33.6184	31.8284	31.936	33.3194	30.6807	26.2481	32.3897
1963	25.9326	30.1668	32.9116	36.225	38.9319	37.9483	34.8358	31.8374	32.33	34.7403	30.3127	26.729	32.7469
1964	23.1868	27.6414	35.2335	38.822	39.38	37.467	32.8668	31.2994	32.6497	34.5842	30.5283	26.8174	32.541
1965	27.0313	28.2839	32.3948	34.9587	38.581	38.153	33.1265	32.1935	33.6277	35.469	31.972	26.4545	32.7015
1966	26.8319	30.4139	32.4539	36.853	39.3897	37.144	35.0677	31.4174	33.081	36.3535	30.729	26.7061	33.0428
1967	24.3165	30.7882	31.15	35.78	39.5087	37.414	33.2529	30.6981	31.9733	34.6645	31.1797	24.7945	32.1162
1968	23.2806	25.5607	32.3755	37.2387	38.7542	39.429	34.2648	31.4174	35.4533	35.3255	32.0243	26.9323	32.6734
1969	25.4865	28.1068	35.5994	38.4643	40.1432	39.0633	35.5194	31.5568	34.8593	36.4213	32.012	28.3584	33.8208
1970	25.6852	27.3229	32.1213	38.923	41.4926	37.568	33.6594	31.6094	31.4513	34.3416	30.4523	27.27	32.6807
1971	24.3997	28.3707	33.2568	39.3	38.47	35.1367	31.8865	31.2158	34.0363	33.7374	31.1623	27.4335	32.3721
1972	26.0245	24.2321	33.8997	36.1803	40.0077	38.7103	33.45	32.2687	34.6473	35.6448	31.5237	26.5026	32.7768
1973	23.9816	29.0264	33.229	39.379	41.0639	37.0587	32.5684	30.2877	31.188	34.0881	30.5867	24.9035	32.2819
1974	25.2529	25.6886	34.8732	37.677	39.13	37.0937	34.4939	33.6587	35.818	34.5048	30.239	25.2319	32.8373
1975	23.4213	25.9782	31.7532	37.976	39.9145	36.961	32.4197	31.601	31.1147	31.9629	29.3053	27.6735	31.6965
1976	25.6087	26.8772	31.9758	36.1547	39.1368	37.2893	33.5677	30.2074	31.4123	34.9565	30.3273	26.6765	32.0245
1977	24.5745	28.7986	35.5923	37.079	38.9077	37.0763	31.1632	30.9468	32.44	36.3752	31.927	27.6623	32.723
1978	25.1777	26.7282	31.4042	37.708	40.8861	37.6117	30.7265	30.8397	32.825	35.1106	30.6957	27.0803	32.2509
1979	24.8377	26.0846	30.7565	38.0223	38.4329	39.7247	33.7119	31.2506	34.6297	34.0087	29.6853	25.9181	32.2702
1980	24.6752	28.8197	32.1958	39.349	40.5526	38.2787	33.06	32.779	35.0563	36.0113	30.9127	25.9394	33.1292
1981	24.3235	28.5614	32.0339	38.4083	39.8177	39.578	32.42	31.3416	34.259	34.5639	28.1807	25.7739	32.4411
1982	24.441	25.5718	30.5532	36.2213	36.5761	38.277	34.7439	31.4997	34.6643	35.9519	28.857	26.5116	32.0142
1983	24.5177	25.935	31.0397	33.9603	38.9958	38.7007	34.1145	31.3719	33.418	33.8535	30.2843	26.2	31.8903
1984	23.6555	25.5338	34.6032	38.174	40.6958	37.277	32.7252	30.3477	31.742	34.1465	30.767	26.9439	32.2293
1985	23.7306	28.9196	35.7148	36.8913	40.4894	37.2183	32.8006	30.9132	34.331	33.8061	31.4317	26.9516	32.774
1986	24.9052	26.3575	32.9074	38.2093	40.0952	38.1353	33.5213	31.1281	34.9087	35.879	31.4067	25.0874	32.7316
1987	25.6245	29.3021	33.6255	38.1837	38.6452	39.1983	36.4635	35.6013	35.8117	37.1616	32.4393	26.7319	34.0792
1988	26.4074	29.6576	32.9084	39.3747	41.6816	39.4263	32.9677	31.9406	34.8313	34.8561	31.5473	27.6426	33.5956
1989	24.4394	27.9271	32.6923	37.3903	40.711	37.2083	33.4919	31.5661	33.9027	35.4245	31.839	25.9581	32.7259
1990	28.1768	26.5829	31.1635	37.4987	39.5677	37.4697	31.9445	30.9739	32.0157	34.0513	30.701	26.8374	32.2713
1991	24.5261	28.0375	32.9513	36.4257	39.2758	39.5903	34.9845	32.1729	32.9433	35.25	30.2817	27.3152	32.8302
1992	25.571	26.4003	32.1806	35.9467	39.6626	40.2903	34.1865	31.4252	31.8103	33.6532	30.2667	27.751	32.4381
1993	25.7281	30.0729	31.601	36.7663	40.5735	38.6897	33.0303	33.7197	34.108	35.529	31.725	28.2742	33.3228
1994	25.8861	27.3493	35.5155	36.504	40.4006	37.9227	31.1048	29.7639	31.148	34.6371	31.204	27.0655	32.3965
1995	23.74	27.8836	31.0071	36.661	40.1794	40.0693	34.2003	31.9726	34.9243	35.3639	30.8843	26.5574	32.796
1996	24.5845	28.7907	35.2713	38.058	39.2445	37.4297	33.9387	30.5874	33.295	34.2474	30.775	27.5174	32.8109
1997	25.129	28.6293	32.9426	35.3443	38.0316	35.5997	34.0752	31.6445	32.5703	31.4987	28.9267	23.6126	31.5063
1998	24.8068	27.4214	32.4145	38.572	41.0742	38.8527	33.5845	34.1329	33.6847	33.46	30.3933	28.9058	33.1305
1999	24.8719	28.0832	34.1513	39.971	39.1365	36.476	34.081	31.9281	35.0477	34.9568	32.599	28.1468	33.3002
2000	26.7123	27.1221	33.4829	40.0533	39.2481	38.4917	33.0771	32.831	34.125	37.5255	31.8457	28.6535	33.6051
2001	25.4868	29.6411	33.9074	37.554	39.671	35.87	30.6916	31.6235	35.3867	36.3016	32.146	28.6355	33.0808
2002	25.3042	27.8725	34.44	38.8547	41.0448	38.9593	34.3171	32.9539	35.001	37.4213	32.1467	28.8506	33.955
2003	25.8574	27.5714	33.4742	38.4163	40.2061	38.039	32.1968	31.4926	32.637	35.0935	30.9283	26.7713	32.741
2004	25.5935	29.4566	37.2458	39.204	39.6277	37.9457	35.2777	31.5865	34.9077	33.1632	31.9067	27.7506	33.636
2005	23.431	26.8289	33.6345	37.218	39.6719	39.1203	34.38	32.5703	33.6943	34.4542	31.5453	25.8745	32.7207
2006	26.3058	33.1111	33.0371	38.378	40.8081	38.3917	33.8516	29.9974	33.1767	34.6032	30.75	26.1797	33.1953
2007	25.4374	28.6686	32.5477	39.385	40.069	37.9817	33.3765	32.3165	34.221	34.9794	32.8647	25.6813	33.1313
2008	23.701	27.0638	35.7119	37.6113	38.4335	35.885	33.5203	31.1052	34.0053	36.0887	31.352	27.6077	32.6822
2009	25.6332	29.9568	34.8877	38.1913	40.9565	38.5573	34.1297	33.0616	35.6503	35.181	30.1083	27.291	33.6421
2010	25.7981	29.5111	36.7984	40.3463	42.0816	38.827	34.1223	31.589	32.557	35.1306	28.6523	25.2055	33.398
2011	24.5726	27.8079	34.5732	37.608	39.8881	38.3157	34.1016	31.6132	30.8977	34.4158	31.883	27.0584	32.747
2012	23.4003	26.5321	33.6881	37.2337	39.9058	38.1043	34.721	31.1765	31.7053	34.3013	30.2317	26.6281	32.3118
2013	24.7716	27.0114	33.9165	36.7433	40.5932	37.249	32.92	30.9223	33.6537	33.3768	29.692	25.9735	32.2552
2014	23.1193	26.5063	32.5606	37.9113	39.2168	39.5808	34.9904	32.5994	32.3419	35.302	31.8348	26.1627	32.6979
2015	24.2815	29.5438	31.9533	37.4455	40.949	37.6047	33.1752	31.9579	34.4928	35.3338	30.9651	27.1442	32.9072
2016	26.8635	29.3698	34.565	38.1985	41.0669	39.4149	33.7664	31.0534	34.1063	34.0418	31.9307	29.73	33.6747
2017	24.4247	29.4213	34.2154	39.0774	40.6415	37.4204	31.9576	32.0333	34.0742	36.7498	30.5556	26.3819	33.0853
2018	27.3997	30.3916	35.5861	39.296	41.6826	38.4914	33.1283	31.6503	32.9016	36.2153	32.1616	26.5471	33.7945
2019	25.1128	26.5596	32.1343	39.4264	39.4892	39.5226	34.9118	31.4725	33.1041	33.1415	28.6962	24.6447	32.3678
2020	23.1035	28.8455	30.8999	37.9688	40.7152	38.0696	35.4838	32.1871	33.9462	35.0528	29.7719	27.0391	32.7545
2021	25.3361	31.1978	36.1834	38.6115	37.8407	36.7756	34.2727	33.1993	32.2462	33.4436	30.5628	25.324	32.9124
MEAN	24.9509	28.0544	33.3129	37.6105	39.7847	37.9502	33.4389	31.6096	33.281	34.6506	30.7902	26.7511
STDEV	1.12046	1.65442	1.58729	1.34281	1.03122	1.09136	1.23276	1.07057	1.461	1.36528	1.037	1.132
CV	4.49066	5.89719	4.76479	3.57031	2.59201	2.87576	3.68662	3.38685	4.38988	3.94012	3.36797	4.23162

## Sheet: Nagaur
Row Labels	Jan	Feb	Mar	Apr	May	Jun	Jul	Aug	Sep	Oct	Nov	Dec	Nagaur Max Temp (1951-2021)
1951	22.4684	26.1296	31.0471	34.736	40.1432	39.5187	37.8387	33.5219	36.8087	37.5906	30.764	24.9632	32.9896
1952	24.7248	26.9662	31.4161	38.2447	41.2781	39.8687	35.2687	32.9952	35.1623	35.4516	30.4387	25.0816	33.0769
1953	22.0787	28.1504	34.8397	36.8517	40.0116	39.6723	35.6152	32.5958	33.7643	34.9726	30.454	28.2052	33.1188
1954	22.3284	25.4864	31.5445	37.1747	40.6381	39.799	35.2732	35.1484	33.6173	32.6213	29.8583	25.2977	32.426
1955	21.9945	27.0746	33.6406	35.6657	39.279	40.5567	37.1255	33.2177	33.0417	32.3481	28.9443	24.4926	32.2997
1956	22.7587	26.9166	31.4452	37.4897	42.4103	39.1603	32.8426	32.0345	34.9633	31.4381	28.6013	24.7258	32.061
1957	21.0435	24.8379	29.9523	35.5347	38.1797	40.0263	36.3097	34.6187	34.3367	34.81	30.325	24.1881	32.0392
1958	25.1568	26.9393	33.0835	39.6013	41.0632	41.828	35.2265	35.7781	31.764	33.3832	29.493	24.6119	33.1844
1959	22.0355	25.2786	34.0945	37.6937	40.4026	40.9073	35.2477	32.9403	32.6433	34.4935	29.128	25.3223	32.5468
1960	23.0616	29.9148	30.3145	36.1173	41.0448	40.6763	35.6397	33.2597	36.264	35.19	30.0847	25.6819	33.0922
1961	23.1442	23.3257	33.2187	36.3513	40.3481	38.8463	35.4606	33.7865	33.108	33.9806	28.2443	23.5052	31.9901
1962	22.809	26.6968	31.6871	37.886	41.2081	40.0003	36.5232	34.7468	33.5823	33.9277	29.886	24.4384	32.8047
1963	24.3323	28.6732	31.7419	36.206	39.6294	40.488	38.0745	34.3923	34.4357	35.529	29.645	25.1455	33.2062
1964	21.0842	26.0497	34.3723	38.9217	40.3371	39.9523	35.2081	33.8952	34.3787	35.0165	29.8713	25.0661	32.8511
1965	25.4684	26.8193	31.6487	34.6383	39.52	40.5653	35.8445	34.64	35.7027	35.9074	31.5377	24.9658	33.129
1966	25.4984	28.8018	31.7374	36.958	40.62	39.3243	37.6839	33.9565	34.4923	36.3616	29.6637	25.1887	33.3755
1967	22.6668	29.4521	30.1181	35.9007	40.5548	40.186	36.0819	33.3119	33.7477	34.8713	30.1927	22.8752	32.4941
1968	21.5145	24.0203	31.4832	37.3397	39.7529	41.7687	36.769	34.7123	37.5053	35.8748	31.365	25.4787	33.1396
1969	23.8597	26.9889	35.201	38.1017	40.2958	41.5843	38.119	34.8877	36.077	36.6374	31.0627	27.1339	34.1935
1970	24.1606	25.5693	31.0648	38.9707	42.5984	40.0603	36.6894	33.7942	33.833	35.1519	30.0703	26.18	33.2131
1971	22.6703	27.5564	32.5213	39.315	39.0952	37.8263	34.5335	33.3403	35.6427	34.4884	30.801	26.6171	32.8778
1972	24.4142	23.0886	32.9042	36.2977	40.9113	40.5947	36.169	33.669	35.0383	35.0181	30.911	24.84	32.843
1973	22.4187	27.6743	31.979	39.3137	42.0268	39.8663	36.2994	32.9077	34.1157	34.7648	30.121	22.9148	32.8768
1974	23.5806	24.6532	34.7048	38.586	40.8042	39.268	36.4268	36.2123	37.535	34.9865	29.989	23.0939	33.3581
1975	21.4271	24.5686	31.3484	37.921	41.3619	39.143	34.6471	33.5994	32.4633	33.0397	28.9637	26.3606	32.104
1976	24.1419	25.5586	30.9842	36.5427	40.3558	39.2487	36.3545	32.6606	33.178	35.3713	29.8623	24.3826	32.3987
1977	22.9165	27.4357	35.209	36.9373	39.5806	38.814	33.519	33.6503	33.252	36.2794	31.726	26.1816	32.9795
1978	23.8771	24.7864	30.3713	37.8913	43.0771	40.411	32.9116	33.6106	34.5557	36.049	30.3157	26.2058	32.8724
1979	23.4455	24.5861	29.621	38.5497	39.1739	42.0007	36.6771	34.6035	35.8333	34.6994	29.7933	25.1123	32.8686
1980	23.1245	27.8714	30.8742	39.4423	42.0694	41.281	35.59	35.7555	37.1197	36.5342	30.0907	24.6468	33.6959
1981	23.1019	27.2786	30.711	38.788	41.4245	42.3167	35.139	34.63	36.7567	35.4897	27.8503	25.0803	33.2275
1982	22.6955	23.3593	28.4297	35.9407	37.0745	40.634	37.8871	34.2274	36.6587	35.8548	28.868	24.7994	32.2387
1983	22.8813	24.7346	30.4013	33.4673	39.0819	40.028	36.1848	33.75	35.2663	34.7377	30.2217	24.9448	32.174
1984	22.3148	24.5193	34.7084	38.4893	43.1748	40.7293	36.1197	34.1529	33.7857	34.901	30.631	25.8906	33.304
1985	22.4597	28.6904	36.0923	37.7553	42.3681	40.2107	35.3929	34.1261	36.2877	34.4061	31.4177	25.6406	33.7494
1986	23.1968	24.6711	32.1023	38.4663	40.8665	40.661	36.2471	34.3042	36.5663	35.9939	31.279	23.9126	33.22
1987	23.9497	28.4111	32.8526	38.649	38.5068	41.3877	39.1971	38.0294	38.199	37.5971	32.1633	25.811	34.5801
1988	25.1787	28.6624	32.0452	39.9467	43.7358	41.8073	35.5406	34.3432	36.187	35.43	31.1857	26.4997	34.2103
1989	22.7968	26.5118	32.1116	37.1267	41.7845	39.664	36.6123	34.9781	36.0533	36.1094	31.2553	24.6184	33.3278
1990	26.0603	25.0264	30.14	37.5237	40.9523	40.103	34.8065	34.0661	34.1903	34.569	30.5653	25.6774	32.8401
1991	22.9019	26.065	31.7894	36.4713	40.8048	41.6283	39.079	34.9884	34.8077	35.3529	29.7017	25.9765	33.3309
1992	23.4981	24.759	31.1748	36.2467	40.7216	42.6877	36.2535	33.4768	33.5	34.2752	29.9973	26.7055	32.7875
1993	23.5855	28.7136	30.3448	37.422	42.3971	40.8607	35.4887	36.5977	35.1557	36.2506	31.6123	27.2768	33.8238
1994	24.0368	25.9046	34.3058	36.4797	42.1006	41.214	34.0652	32.9103	33.5757	35.0577	31.0803	25.7848	33.0738
1995	22.1648	26.5761	30.0313	36.7693	41.4174	42.4607	36.8871	33.6716	36.3423	35.9929	30.6177	25.0777	33.1845
1996	23.1516	27.379	33.5874	38.4607	40.3913	38.6267	36.5813	33.1323	35.0147	34.6684	30.452	26.2235	33.1432
1997	23.6787	27.1711	31.5226	35.562	38.6832	38.343	37.0281	33.9881	35.144	30.1016	27.2513	20.7432	31.6107
1998	22.6261	25.6664	30.0432	38.3213	41.7768	40.4957	35.8861	36.679	35.2757	33.75	29.9667	27.2116	33.1715
1999	22.2335	26.59	33.6735	40.4827	41.2029	39.4973	37.2026	34.8419	36.8123	36.2435	32.3163	26.6319	34.0019
2000	23.941	24.9859	32.3313	40.277	40.5345	40.4527	35.7848	35.1013	35.858	38.0797	30.7407	26.5581	33.7341
2001	23.4671	28.1907	33.2803	37.317	41.1281	38.322	33.7658	34.2281	37.053	37.141	31.812	26.9271	33.5685
2002	23.8161	26.4514	33.7677	39.566	42.4542	41.6763	38.4981	37.0277	36.9767	37.2884	31.1987	27.04	34.6845
2003	22.7629	25.4382	32.1481	38.676	40.9826	40.8013	34.5732	34.0261	34.8057	35.2629	29.8537	24.7581	32.8666
2004	22.8068	28.0848	36.4406	39.9263	40.8371	40.0017	38.6174	34.6016	36.871	33.2342	31.2723	25.8197	34.0428
2005	21.4413	24.7368	32.2306	37.1443	40.13	41.3973	36.599	36.2635	35.57	35.4287	30.911	24.6194	33.0723
2006	24.6139	32.1357	31.8416	38.9483	42.4171	39.871	37.0861	33.7813	35.7483	35.4481	30.2747	24.1287	33.8463
2007	23.8374	26.7096	31.15	40.006	41.4232	40.0963	36.4387	35.0716	35.575	35.4052	32.5917	24.2097	33.5604
2008	21.9071	25.8172	35.5348	37.6537	39.3939	37.9287	36.4555	33.8513	35.5667	36.9274	31.1543	26.3077	33.2227
2009	24.1148	28.4818	33.9852	38.4833	42.4439	41.116	37.3226	36.3629	37.3663	35.7765	29.3947	25.9384	34.2536
2010	23.0561	28.0607	36.5113	41.4363	43.2061	40.8073	36.719	33.829	33.7923	35.2842	28.342	23.7542	33.754
2011	21.8245	25.9504	33.2055	37.3037	41.7494	40.1137	36.5432	33.8819	32.857	34.8939	31.413	25.551	32.9708
2012	22.2261	25.5417	32.9771	37.2593	41.4219	40.9467	38.4219	33.5726	33.7983	34.7313	30.044	24.8703	32.9973
2013	22.8526	24.9579	32.8587	37.0133	42.44	40.626	36.7229	33.5497	35.7207	34.421	29.1877	24.9513	32.9779
2014	21.8694	24.9292	31.1083	37.3951	39.7763	41.7768	37.6471	35.5287	34.7076	35.6921	31.4208	24.406	33.0518
2015	21.9249	28.3129	30.6078	37.3313	42.0214	39.8794	35.2772	34.3103	36.8526	36.1333	30.3217	25.7954	33.2397
2016	24.7388	28.0711	33.8555	39.1601	42.4823	42.0099	36.5823	33.6149	36.172	35.721	31.5728	28.5057	34.3771
2017	22.3731	28.5141	33.3048	40.0631	41.9936	39.1222	35.4698	34.8133	36.5354	37.7002	29.8935	25.5519	33.7924
2018	25.6861	29.1644	35.1481	39.6789	42.744	40.5352	36.1734	34.5503	34.5032	36.1801	31.1724	25.3271	34.2558
2019	23.0792	24.6273	30.6694	39.5169	40.5916	42.365	36.9195	34.3317	35.859	34.3036	27.7305	21.7447	32.67
2020	21.0944	27.3874	29.617	37.3475	41.3884	40.7625	38.0329	34.7179	36.3705	36.1009	28.9319	25.4197	33.0987
2021	22.7562	30.2324	35.2388	38.4104	38.9459	39.3792	37.1155	35.8621	33.6531	34.0496	30.1652	24.0268	33.3222
MEAN	23.1395	26.6105	32.3669	37.7952	40.94	40.3745	36.2582	34.3382	35.1515	35.194	30.2822	25.2623
STDEV	1.14525	1.79712	1.83641	1.52316	1.31989	1.09801	1.32284	1.12168	1.43495	1.37973	1.09078	1.31781
CV	4.94932	6.75342	5.67373	4.03002	3.22397	2.71958	3.64838	3.26657	4.08218	3.92035	3.60205	5.2165

## Sheet: Sri Ganga Nagar
Row Labels	Jan	Feb	Mar	Apr	May	Jun	Jul	Aug	Sep	Oct	Nov	Dec	Sri Ganga Nagar Max Temp (1951-2021)
1951	20.8055	24.3625	29.0687	33.5343	39.9813	40.675	39.0277	35.0387	37.1407	37.1019	29.5153	23.0706	32.4796
1952	22.771	25.1462	29.2368	37.5573	41.2697	40.1997	36.56	34.1558	35.3383	35.1232	29.62	23.5358	32.549
1953	20.3787	26.3582	33.479	36.1127	39.9306	39.5903	35.6645	33.7471	34.6757	34.6077	29.4463	26.4952	32.5648
1954	20.4948	23.0361	29.5094	36.149	40.1326	39.9343	36.0035	36.6635	34.4403	32.0823	28.7853	23.6284	31.776
1955	20.2452	25.1111	31.6319	34.8667	38.6832	41.7693	38.1158	33.9758	33.4673	31.2271	28.1157	22.7203	31.6829
1956	20.9945	25.4807	28.9658	36.8043	42.7058	40.0533	33.9087	33.4206	36.097	30.6158	27.519	22.8916	31.6168
1957	19.0074	22.7654	27.6358	34.009	37.9006	40.5627	37.0787	35.3226	34.2667	33.7287	28.6753	21.951	31.1074
1958	23.181	24.9779	30.8452	38.485	40.6123	42.3187	35.8977	36.1374	32.5367	32.7019	28.4397	22.859	32.444
1959	20.1748	22.7864	31.6719	36.5923	40.3119	41.8297	36.2306	34.3971	33.63	33.8771	27.8287	23.5313	31.9465
1960	21.0661	27.8634	28.139	35.009	40.9506	41.5337	36.1977	34.29	36.61	34.1213	28.5977	23.9568	32.3522
1961	21.2658	20.9	30.6974	35.3563	40.0626	39.6577	36.5184	34.481	34.3113	33.3777	26.629	21.1168	31.2519
1962	20.4426	24.2207	29.2155	36.818	40.7245	40.7553	37.0581	35.9329	33.5883	33.1116	28.221	22.1906	31.8866
1963	22.0987	26.5461	29.3732	35.0043	39.1094	41.0377	38.7606	34.7894	34.9413	34.8919	28.4127	22.9126	32.343
1964	18.8335	23.9755	32.2742	37.459	39.6348	40.882	35.2713	34.8081	34.3737	34.2484	28.5677	22.7168	31.9267
1965	23.259	24.5054	29.4281	32.9133	38.9568	41.586	36.5458	35.5868	36.3	35.0406	30.4103	23.3168	32.3523
1966	23.8645	26.6354	29.8939	35.9503	40.3755	39.7323	38.3006	34.5306	34.725	34.8877	27.99	23.1052	32.5244
1967	20.7677	26.9089	27.5142	34.5573	40.0774	41.037	36.611	33.9839	34.149	33.5897	28.047	20.6552	31.4968
1968	19.1158	21.2114	29.0006	36.0393	39.7287	41.5323	36.6861	35.9013	37.728	34.48	29.612	23.409	32.0504
1969	21.819	24.4207	32.8635	35.9643	38.4826	42.2223	37.7794	35.9032	35.45	34.8413	29.7343	25.0126	32.9114
1970	21.369	23.21	29.0155	38.025	41.8981	39.869	37.5345	34.4739	34.429	34.7232	28.8163	24.3587	32.3524
1971	20.8771	25.5168	30.711	37.677	38.2561	38.5977	35.4094	34.0435	35.225	34.5842	29.2857	24.8232	32.1038
1972	22.4203	21.4931	30.7574	34.802	41.1158	41.558	37.0655	34.5513	35.648	34.2326	29.3953	22.6494	32.1638
1973	20.8265	25.4546	29.1955	38.2417	41.1926	39.718	36.8352	34.1306	35.271	33.71	28.9223	20.0319	31.9751
1974	21.2665	22.8325	31.9248	37.9773	40.3519	39.3553	36.9581	36.7413	37.371	34.6113	29.3937	21.1777	32.5376
1975	19.5942	22.3743	29.2797	36.466	40.9984	39.391	35.1535	34.2484	32.9837	33.5948	28.3133	24.5216	31.4526
1976	21.6784	22.9745	27.9323	34.938	39.9448	38.958	36.9065	33.2071	34.1017	34.2439	29.3873	23.1003	31.4623
1977	20.5113	24.9332	32.8926	35.379	38.0768	39.0303	34.0461	34.5748	33.0963	34.3042	30.3243	24.0923	31.7985
1978	21.5158	22.5282	27.1416	36.322	43.419	40.687	34.1465	34.4768	34.456	34.8316	28.6597	24.5555	31.9376
1979	22.08	22.1464	26.7074	37.0777	38.3642	41.8493	37.2616	36.5316	35.809	34.6958	29.1033	23.7987	32.1586
1980	21.1852	25.5403	28.1687	38.0793	42.4971	41.4083	35.9187	36.1326	36.408	34.8794	28.5013	22.6758	32.6168
1981	20.7739	24.4689	27.7568	37.2417	40.83	42.6087	35.5745	36.1239	36.8453	34.3497	26.9463	23.7216	32.2943
1982	20.9742	20.7907	25.251	34.0703	36.1497	40.5647	38.9003	34.9781	36.8183	34.4494	27.9947	22.9594	31.203
1983	20.791	22.5482	28.0539	31.738	37.6916	39.6813	36.18	34.5297	35.3947	33.4374	29.1777	23.4406	31.093
1984	20.7681	22.2479	31.9494	36.6167	43.5255	40.8207	35.9871	35.2284	33.7117	33.9919	29.054	23.8552	32.3381
1985	21.0168	26.5775	33.4297	36.3807	41.8745	40.6527	35.5561	35.1226	35.9127	32.8481	29.3003	23.5445	32.7033
1986	21.1248	22.4957	29.19	36.4017	39.2352	40.2743	35.6594	35.2342	36.0647	33.9248	29.518	21.8623	31.783
1987	21.7687	25.7511	29.5639	37.0123	36.4806	41.2767	39.7548	37.7084	38.019	35.4897	30.5717	24.0252	33.1396
1988	22.5174	25.7745	29.1229	38.356	43.2006	41.3913	35.2219	34.7261	35.119	33.7974	29.1917	23.7294	32.6803
1989	20.2919	23.5118	29.0835	35.2093	40.9897	39.2533	36.7639	35.129	35.9873	35.0287	29.1543	22.1497	31.915
1990	22.5687	22.4311	27.5019	36.063	40.1445	41.064	34.95	34.7626	34.5423	33.3481	29.225	23.4903	31.7114
1991	20.691	23.6529	29.0526	34.6843	40.3813	40.5667	39.5845	35.6819	35.3807	33.9416	28.3293	23.329	32.1469
1992	20.9848	22.0855	28.4426	34.9633	39.6861	42.1937	36.0729	34.0648	33.8487	33.4452	28.6063	24.6184	31.6
1993	20.5335	26.1075	27.4919	36.3887	42.1032	41.1797	35.8271	37.5016	34.3407	34.9281	29.862	25.0758	32.6341
1994	21.71	23.3682	31.4645	35.006	41.431	41.6047	34.8316	33.9648	34.2833	34.0055	29.4483	23.6158	32.0995
1995	19.7297	23.4614	27.7152	34.9427	41.2168	42.6693	36.7894	33.2765	35.4367	34.7287	29.1297	22.9	31.8611
1996	21.0281	24.4648	30.4239	36.8903	39.7774	38.2023	36.6955	33.8229	34.9897	33.3739	28.998	23.9268	31.8918
1997	21.1655	24.4068	28.8103	33.8807	38.0742	38.4073	37.1716	34.55	35.7337	28.8929	25.6617	17.6913	30.3861
1998	20.2977	23.1071	26.9684	36.712	41.1439	40.536	36.3652	36.7939	35.0127	32.6419	28.747	23.2281	31.8297
1999	18.7226	24.0529	31.0003	39.5897	40.7216	39.328	36.9455	35.4932	36.183	34.7371	29.785	23.9526	32.5721
2000	20.2423	21.7969	29.6474	39.1987	40.6932	39.6553	35.6661	35.8313	35.917	36.5381	28.8733	24.1526	32.3698
2001	20.3177	25.8318	30.9716	36.0683	40.62	37.6967	34.8648	35.3319	36.9103	35.779	30.163	24.0119	32.4034
2002	21.4148	24.0082	31.1948	38.4987	42.1713	41.1663	39.5155	37.37	35.4567	35.1442	29.5087	24.4587	33.3712
2003	18.2287	22.8632	29.2765	37.065	40.0465	41.1693	34.6013	34.5839	34.471	33.6403	27.7973	21.7577	31.319
2004	19.2281	25.08	33.7552	38.4757	39.5813	39.0183	38.6332	34.7413	36.174	31.6581	29.1447	23.1174	32.3876
2005	19.4484	21.8371	29.3381	36.0653	39.6677	41.8647	36.3429	37.3958	35.1997	34.6906	29.4797	22.9403	32.0665
2006	22.0052	29.3532	29.4413	38.154	41.6513	39.6113	36.9497	35.3819	35.5813	34.2229	28.757	22.2152	32.775
2007	21.5003	23.7061	28.2948	38.741	40.42	39.579	37.0619	35.7542	34.942	34.2452	30.4843	22.4426	32.2944
2008	19.7219	23.5379	33.4516	36.5567	38.9384	37.5407	36.9974	34.6826	35.1443	35.1881	29.6667	24.0829	32.1443
2009	21.7697	25.8339	31.2165	37.3437	41.5419	41.9013	37.6355	36.9384	36.297	34.5423	27.8237	23.711	33.0749
2010	19.1716	25.4236	33.8794	40.7553	42.3842	40.6023	36.7481	34.6503	33.663	33.9503	28.028	21.9235	32.6226
2011	18.6152	23.5593	30.4526	35.817	41.3265	39.1483	36.4352	34.4623	33.7223	34.0932	29.772	23.419	31.7709
2012	19.9087	23.0638	30.2503	35.8267	41.2671	42.014	38.7361	34.5394	34.185	33.5274	28.5693	21.98	32.0032
2013	19.7216	22.5132	30.1213	35.9823	42.2432	40.324	37.1952	34.2932	35.5697	33.4471	27.842	22.6542	31.8681
2014	19.7289	22.0277	28.1475	35.6449	39.1288	42.0291	37.7029	36.5727	34.8126	34.0159	29.4891	21.2494	31.7506
2015	18.6936	25.333	27.6262	35.3131	41.2293	39.6274	35.5013	34.9954	36.3496	34.6823	28.6538	23.416	31.803
2016	21.1842	25.6494	30.906	38.353	41.5991	41.5862	36.6635	34.502	36.1316	35.0648	30.0774	25.6435	33.1168
2017	20.3123	26.0324	30.6505	38.852	41.3024	38.8184	36.2593	35.5353	36.2245	36.1598	27.9182	23.4603	32.6503
2018	22.5387	26.4047	32.5489	38.068	41.696	40.0933	36.4901	35.4693	34.432	34.351	29.1505	23.0854	32.8855
2019	20.7516	21.7156	27.1725	37.2659	39.7688	42.6727	36.7009	35.3564	36.2633	33.1657	26.1109	18.5228	31.3206
2020	18.6942	24.1741	26.271	35.0965	39.8944	40.2883	37.5015	35.5283	36.8141	35.2795	27.2158	22.4139	31.6026
2021	19.7134	26.8529	31.8465	36.5946	38.476	39.7577	37.4767	36.5287	33.8335	33.281	28.8002	22.2656	32.1334
MEAN	20.7645	24.1425	29.7592	36.4232	40.3669	40.5038	36.6474	35.1453	35.2153	34.0858	28.8211	23.0831	32.1048
STDEV	1.20072	1.78111	1.95046	1.6332	1.51017	1.21611	1.28162	1.04673	1.17583	1.24713	0.96128	1.40696	0.549162
CV	5.78258	7.37748	6.55414	4.48396	3.74112	3.00246	3.49716	2.97831	3.33897	3.65879	3.33534	6.09518	1.71053

## Sheet: Tonk
Row Labels	Jan	Feb	Mar	Apr	May	Jun	Jul	Aug	Sep	Oct	Nov	Dec	Tonk Max Temp (1951-2021)
1951	22.621	25.9907	31.1426	35.0407	40.319	39.2923	36.7442	31.9661	35.87	36.7403	30.646	24.5765	32.6044
1952	24.9974	27.6879	31.6394	37.9123	41.5077	38.8917	33.1165	31.1342	33.8293	34.7219	30.0553	25.0326	32.5417
1953	21.781	28.5104	34.3932	36.7483	40.1168	38.927	34.2881	31.6187	33.3873	34.4113	30.205	28.2	32.7271
1954	22.979	26.52	31.84	37.1213	40.4761	39.2693	33.9926	33.4071	32.1833	31.549	29.6683	25.2519	32.0389
1955	22.3455	26.7386	33.991	35.797	39.7661	40.189	35.6703	32.0223	31.92	30.9606	28.2703	24.4277	31.8593
1956	22.7961	26.7724	31.8984	37.56	41.8819	38.4043	31.7903	31.07	33.8063	30.26	27.6593	24.49	31.5276
1957	21.4258	24.9889	29.669	35.8357	38.5606	39.805	34.5771	32.9548	33.239	33.8223	30.3093	24.6897	31.6768
1958	25.2035	27.0357	32.8958	39.0527	41.1416	41.3703	33.2494	33.5839	30.9227	32.0377	28.792	25.0677	32.5471
1959	22.8577	25.725	33.9439	37.38	40.2355	39.7113	33.2519	31.1429	31.832	32.841	28.7513	25.5997	31.9633
1960	22.8277	29.7545	30.6381	35.9657	40.7674	39.7693	34.5948	31.1845	34.8337	33.7768	29.3377	25.7852	32.4232
1961	22.8068	23.545	32.8739	36.579	40.2594	38.6343	33.919	32.3239	31.3263	31.8094	27.7837	22.5745	31.2398
1962	22.8126	26.5725	31.3677	37.564	41.1116	39.792	34.9923	32.6958	32.1103	32.5661	29.6173	24.739	32.1791
1963	23.7723	28.6518	31.8261	36.386	40.0506	40.0437	35.9239	32.331	33.0777	34.0635	29.6033	24.6081	32.5354
1964	22.0032	26.5628	34.3461	39.1117	40.1026	39.868	34.1442	32.6058	33.13	34.2365	29.282	25.0932	32.5425
1965	25.059	26.6911	31.2613	35.108	39.5965	40.5753	34.9006	33.7539	34.1183	34.9174	30.799	24.9177	32.6629
1966	25.0397	29.1632	31.6194	37.1223	40.5194	38.873	37.1139	31.9952	33.6913	35.9068	29.592	24.9948	32.9802
1967	22.6377	29.5275	29.8945	36.042	40.4852	39.6943	34.9235	31.3029	32.339	34.309	30.2967	23.0929	32.0382
1968	21.5987	24.3455	31.3794	37.1277	39.83	41.576	34.9997	32.4103	36.5037	34.6403	30.6743	25.3265	32.5361
1969	23.6539	27.1607	34.9229	38.0863	40.141	41.2907	35.8597	32.521	33.744	35.5877	30.455	26.3484	33.3366
1970	24.1329	25.1021	30.9935	38.7817	42.0958	38.8243	35.4319	31.9661	32.6173	34.4097	29.4497	26.0716	32.5238
1971	22.6145	27.3329	32.4181	38.7963	38.9745	36.6687	32.0274	31.1519	33.4657	33.3529	29.928	25.5368	31.8615
1972	24.5471	23.8383	32.929	36.5437	41.4703	40.527	35.5145	32.0623	34.26	34.5358	30.6047	25.0103	32.6708
1973	23.0794	27.295	31.8829	39.412	41.8232	39.3603	34.19	31.5742	32.3743	33.5413	29.7577	23.079	32.2895
1974	23.6629	24.8857	34.2242	38.71	40.5558	39.027	34.3503	33.6116	36.0903	33.3639	29.4617	23.0639	32.6117
1975	21.371	24.2764	31.1229	38.044	41.3271	38.5023	33.1526	31.8258	31.1577	31.941	27.9763	25.6013	31.3883
1976	24.1219	25.7493	31.2119	36.6313	39.9168	37.718	35.0184	31.2494	32.597	34.689	28.9693	23.6806	31.8053
1977	23.1213	26.7357	34.6423	36.85	38.8832	38.6463	32.0284	32.5287	32.0033	35.0106	30.9687	26.2197	32.3236
1978	23.4519	24.0143	29.7874	37.377	43.1068	39.399	31.8339	31.449	33.0543	34.8123	30.026	25.0494	31.9789
1979	23.3684	24.2325	29.601	38.2253	39.201	41.062	34.8858	33.0003	35.086	34.2248	29.1307	24.4532	32.2312
1980	22.8577	27.3148	30.6581	39.0963	42.0465	39.5053	33.2806	33.8661	35.5607	35.6294	29.528	24.1748	32.7889
1981	22.7368	27.01	30.4519	38.4273	41.2042	41.7957	33.1677	32.5871	35.4927	34.4855	27.3577	24.3813	32.4327
1982	22.4581	23.2321	28.4358	35.8613	37.0097	40.3097	36.4487	32.1581	35.3257	34.7558	27.9577	24.6165	31.5794
1983	22.5335	24.2532	30.6065	33.4023	39.0768	39.6377	34.7755	32.4481	33.8137	33.1171	29.2227	24.3277	31.4653
1984	21.9629	24.2014	34.1932	38.313	43.0419	39.9953	34.6552	32.2516	32.274	34.321	30.0873	25.9071	32.6182
1985	22.9342	28.1018	35.7465	37.7903	42.1581	40.2433	34.3674	31.8858	34.0587	32.2142	30.4877	25.429	32.9618
1986	23.0226	24.2711	31.8365	38.384	40.3129	40.043	34.4594	32.8106	35.7657	34.6623	30.6713	23.5435	32.5085
1987	23.4035	28.1579	32.7487	38.1607	38.5823	41.1023	38.4758	36.2045	36.8103	36.1742	31.2463	25.3677	33.884
1988	24.7652	28.351	32.2223	39.5247	43.4094	40.3747	33.3042	32.3374	34.9597	34.1639	30.299	26.0413	33.3073
1989	22.6606	26.4757	31.7003	36.9427	42.029	39.385	35.3384	33.5129	34.9413	35.3565	30.713	24.3526	32.8061
1990	25.9148	24.5368	29.5839	37.104	39.9726	39.369	32.6977	32.5971	32.4987	33.7668	29.8147	25.1387	31.9464
1991	22.7455	26.7889	32.4068	36.5893	41.3935	41.2253	36.7519	32.3687	33.7867	34.5203	28.3527	24.7674	32.6638
1992	23.3419	24.6334	31.6558	36.7207	40.8023	42.278	35.1629	31.8913	32.902	32.8858	28.8257	25.7452	32.2464
1993	23.77	28.0061	30.0845	37.2313	42.3235	39.8507	33.8468	34.2755	33.3127	34.9752	30.5117	26.2455	32.8836
1994	23.9487	25.7693	34.0545	36.3803	41.9581	39.7337	32.0077	31.3281	32.6597	34.09	30.0063	25.5023	32.3137
1995	21.7648	26.1864	29.8526	36.9403	41.3268	42.5767	35.4461	31.7345	34.905	35.0961	29.7997	24.5958	32.532
1996	22.3139	26.921	33.3948	38.147	40.5552	38.976	35.2252	30.9513	33.0873	32.9216	29.6037	25.2748	32.2811
1997	22.7923	26.3239	31.0829	35.1127	38.509	37.813	35.0623	32.0042	33.5553	29.3219	26.6	19.5474	30.6505
1998	21.9197	25.1543	29.4842	37.777	41.5332	39.8633	34.09	34.2784	33.58	32.4094	28.9157	26.2668	32.131
1999	21.4094	25.455	32.7139	40.0197	40.7765	38.7237	35.071	33.06	33.9967	33.2906	30.595	24.4865	32.4872
2000	22.5629	24.1186	31.6271	39.9147	39.7632	39.3557	33.7045	33.0455	33.8747	36.7668	29.395	25.0084	32.4384
2001	23.1852	27.5461	32.5732	37.0983	40.7042	37.6563	31.9484	32.9365	36.277	35.3755	30.924	26.5419	32.7429
2002	23.57	26.1279	33.2526	39.3737	42.0694	40.8407	37.7339	34.5335	35.7567	36.3777	31.0787	27.3465	34.0396
2003	22.4039	25.35	32.1845	38.9367	40.94	40.4243	33.8777	32.4642	32.8933	34.1832	29.9867	24.4481	32.3632
2004	22.4258	27.6045	36.0123	39.7837	40.4094	39.4657	37.0326	31.8468	35.4967	32.2081	30.4573	25.4635	33.1803
2005	21.5326	25.5014	32.4568	37.0573	40.4474	40.9167	33.63	34.2771	33.7667	34.1716	30.195	24.0787	32.3576
2006	24.9839	31.9029	31.5145	38.6773	42.1003	38.6353	34.0968	31.6455	34.6533	35.0152	30.134	25.0448	33.1855
2007	24.1971	26.6175	31.389	39.899	41.4552	39.6287	34.1261	33.0203	33.9063	34.4694	31.683	24.1861	32.8957
2008	21.6035	25.2959	34.7161	37.5697	39.3277	36.1953	34.0471	32.3394	33.857	35.7742	30.228	26.5242	32.3043
2009	24.0519	28.3296	33.7642	38.358	41.9074	40.9157	35.4571	34.4365	35.911	34.0648	28.4633	25.2229	33.4212
2010	23.0087	28.0186	35.8232	40.9677	42.9994	40.7007	35.5235	32.4981	32.6433	34.3355	27.45	23.3423	33.1255
2011	21.8074	25.8354	32.7861	37.458	41.6797	39.025	34.3894	32.2932	32.3147	34.2268	30.779	25.2052	32.3417
2012	21.7465	25.8355	32.7481	37.5983	41.2097	40.7877	36.3835	31.4916	32.7187	33.9135	29.3017	24.8419	32.3874
2013	22.3561	24.6557	32.5155	37.176	42.2487	39.3497	33.9997	31.7968	34.394	32.6542	28.2253	24.2061	31.994
2014	20.647	24.3621	30.8551	37.4992	40.097	41.6816	36.3947	33.6296	33.7821	34.8317	30.9513	23.8611	32.4092
2015	21.3396	28.042	30.2916	36.8629	42.0173	39.3455	33.8371	32.8884	35.9284	35.4924	30.1665	25.1826	32.6213
2016	24.7048	27.4476	33.5618	38.9595	42.0109	41.1378	34.0647	31.4856	34.6142	34.196	30.651	27.3522	33.3484
2017	22.3692	27.8526	32.6986	39.743	41.6361	38.6537	33.6318	32.8961	35.0925	36.3535	29.2682	24.7959	32.9272
2018	25.092	28.4275	34.4092	39.0413	42.2411	39.9473	34.0831	32.4128	32.3441	34.9143	30.2696	24.3294	33.1397
2019	22.6918	24.2963	30.372	39.0421	40.4764	41.7231	34.9136	32.151	33.532	32.9003	28.1974	21.3573	31.8243
2020	21.0053	26.4439	29.3131	37.111	41.0236	39.7906	36.3272	32.5797	35.0008	34.8627	28.1563	24.8464	32.2058
2021	22.5806	29.3385	34.6228	38.2691	38.2014	38.8471	35.6835	33.5135	32.0618	32.997	28.8675	23.1452	32.345
MEAN	22.9833	26.4155	32.1515	37.6793	40.8058	39.7681	34.5775	32.4954	33.7842	34.0462	29.6267	24.8539
STDEV	1.14021	1.73254	1.7301	1.38734	1.26683	1.20776	1.40664	0.99545	1.3945	1.44635	1.06168	1.28509
CV	4.96104	6.55881	5.38108	3.68196	3.10453	3.037	4.06806	3.06335	4.12768	4.2482	3.58353	5.17059

## Sheet: Udaipur
Row Labels	Jan	Feb	Mar	Apr	May	Jun	Jul	Aug	Sep	Oct	Nov	Dec	Udaipur Max Temp (1951-2021)
1951	24.4932	27.7675	32.2597	34.9127	39.0577	36.6077	33.7126	29.6584	34.4337	36.21	31.532	26.7581	32.2978
1952	26.9039	28.9907	32.4768	37.4997	40.009	36.5207	30.7558	28.8642	32.0473	34.4574	30.7317	27.1913	32.1998
1953	24.0706	30.2054	34.2213	36.484	38.4165	35.9713	31.8265	28.9923	31.272	33.79	30.766	29.4777	32.1238
1954	24.8081	28.1779	32.77	36.9123	39.1581	36.0643	31.4216	31.051	30.053	31.4148	30.332	26.9668	31.6031
1955	24.6487	28.5361	34.91	35.7463	38.9597	36.7917	32.8645	29.8306	30.2903	31.2226	28.9543	26.21	31.5905
1956	24.9171	28.0359	33.479	37.5773	39.811	35.8723	28.8974	28.6448	31.543	30.2606	28.5917	26.3261	31.1557
1957	23.7255	26.3893	31.0274	36.257	37.789	36.8787	31.7868	30.9239	32.013	33.9016	31.3297	26.9768	31.5981
1958	26.8477	28.6579	33.9797	38.6743	40.2503	38.5177	31.0016	31.499	29.132	31.7116	29.6587	26.7152	32.2303
1959	24.7826	27.5393	34.9442	37.535	39.3939	36.94	30.3435	28.591	29.558	31.96	29.4473	27.1394	31.5268
1960	24.7358	30.919	31.1458	36.3003	39.4245	36.7113	31.8442	28.9219	33.0657	33.9752	30.5237	27.3906	32.0636
1961	25.2558	25.4489	34.3352	36.5127	39.2758	35.6773	31.0535	30.2955	29.2783	31.7929	29.082	25.1419	31.1253
1962	24.7829	28.5046	32.5552	37.4027	40.0506	36.638	32.3694	30.5513	30.9497	32.5129	30.4523	26.6642	31.9602
1963	25.9832	30.4018	33.0681	36.2183	38.9697	37.144	33.0987	30.1765	30.924	33.6081	30.1543	26.7652	32.2088
1964	23.8358	28.14	35.2213	38.6933	38.9452	36.69	31.5287	30.0997	31.7083	33.9613	30.3457	27.1894	32.1951
1965	26.9887	28.355	32.4339	35.5043	38.5177	37.4623	31.9848	31.2758	32.39	34.7061	31.6657	27.1342	32.3805
1966	26.8206	30.7339	32.6026	36.8583	39.0552	36.5417	33.7397	30.4845	32.3297	36.08	31.1663	27.3835	32.818
1967	25.0319	31.2286	31.4397	36.0993	39.5581	36.5457	31.771	29.4835	31.0187	34.3687	31.45	25.6452	31.9563
1968	24.0994	26.2783	32.4123	37.07	38.55	38.7383	32.8416	29.5852	34.573	34.7655	31.6973	27.1271	32.3094
1969	25.789	28.1775	35.2494	38.3637	39.8977	37.9113	33.589	29.5094	32.956	35.3968	31.7047	27.9523	33.0573
1970	25.7248	27.39	32.2019	38.583	40.9294	36.047	32.0997	30.3845	30.273	33.5945	29.9053	27.2023	32.0477
1971	24.61	28.2171	33.1623	38.8677	38.1526	34.08	30.2268	29.7352	32.575	32.4729	30.519	27.0784	31.6436
1972	26.2206	24.5807	34.0029	35.9833	39.5016	37.6303	32.0603	30.3903	33.3437	34.7761	31.088	26.6965	32.2057
1973	24.4784	28.9989	33.3052	39.448	40.681	36.373	30.6239	29.0048	29.2967	33.0842	30.2367	25.2897	31.7345
1974	25.5684	26.295	34.5406	37.6217	38.5555	36.5053	32.8558	31.6635	34.533	33.0597	29.6713	25.4784	32.218
1975	23.6877	26.2236	31.7171	37.9523	39.0871	36.009	31.2668	30.2003	30.1493	31.219	29.0623	27.6361	31.2019
1976	25.7529	27.56	32.3794	35.97	38.4423	35.5807	32.1394	29.0019	30.9	34.5268	30.0333	26.7823	31.5943
1977	24.6413	28.4921	35.2839	36.7713	38.2887	36.2263	29.9148	29.6552	30.9013	35.3877	31.0703	27.4735	32.0188
1978	24.9871	26.7996	31.1365	37.265	40.1503	36.5337	29.7168	29.2923	31.7053	34.0197	30.2857	26.2371	31.5228
1979	24.8942	26.1218	30.889	37.7757	38.31	38.768	32.0535	29.729	33.7793	33.6229	29.1453	26.0484	31.7738
1980	25.01	28.8362	32.331	38.961	40.0639	36.261	31.4023	31.0197	33.5623	35.5106	30.9187	26.1716	32.4976
1981	24.3829	28.6946	32.1229	38.1587	39.4081	38.6167	30.9784	29.6326	32.9753	33.6206	27.8063	25.7313	31.842
1982	24.6197	25.9518	30.8426	35.959	36.3874	37.435	33.3094	29.9858	33.374	35.2458	28.2403	26.7355	31.5282
1983	24.6681	25.9232	30.9523	34.0227	38.6984	37.7503	32.7087	30.1635	32.101	32.4655	29.5417	25.9423	31.2654
1984	23.7694	25.5841	34.2761	37.984	40.1435	36.5577	31.3297	28.8445	30.4993	33.49	30.279	27.0155	31.657
1985	24.0971	28.7825	35.5606	36.6357	39.9639	36.717	31.9342	29.4165	33.126	32.6729	30.923	27.0955	32.2491
1986	25.2374	26.5746	32.9603	37.965	39.4452	37.3763	31.9752	29.7713	34.0333	35.1697	31.327	25.3148	32.2773
1987	25.6919	29.2721	33.3739	37.2477	38.7123	38.278	35.471	33.8571	34.5063	36.171	31.875	26.8519	33.4543
1988	26.4135	29.5393	32.9955	38.835	41.0271	38.442	31.5035	30.4239	33.4313	33.5139	30.9007	27.3997	32.8593
1989	24.5632	27.9639	32.5077	37.3607	40.4116	36.4273	31.9948	29.8445	32.7867	34.7919	31.6577	26.2765	32.2248
1990	28.3387	26.94	31.3223	37.499	38.9226	36.3303	30.2961	29.6732	30.695	33.1684	29.9723	26.5155	31.6563
1991	24.5361	28.4814	33.2097	36.2767	39.1916	38.677	32.8355	30.269	32.0763	34.6594	29.765	26.8319	32.2435
1992	25.7526	26.4486	32.5816	36.1153	39.4039	39.4637	33.11	30.309	31.1517	32.82	29.6583	27.3968	32.0253
1993	25.9606	29.6893	31.4823	36.613	40.1729	37.757	31.5442	32.1142	32.8527	34.66	31.174	27.8706	32.6607
1994	26.0565	27.4343	35.4371	36.3727	39.8761	36.3293	29.5439	28.6055	30.156	33.8816	30.4043	26.8984	31.7679
1995	23.5365	27.6868	30.6719	36.2957	39.4777	39.1507	32.6319	30.3868	33.5587	34.3468	30.2757	26.381	32.0385
1996	24.2884	28.8534	35.3523	37.828	39.3568	37.5053	32.7019	29.2923	31.786	33.1171	30.077	27.1771	32.2746
1997	24.6332	28.0675	32.9026	34.7577	37.7139	34.449	32.2142	30.2929	31.2887	31.4684	29.25	23.5032	30.8845
1998	24.5248	27.305	32.4813	38.164	40.6881	38.0537	31.8326	31.9506	32.0647	32.2532	29.691	28.1061	32.2758
1999	24.7642	27.9668	33.7516	39.2237	38.311	35.4183	31.9516	30.6277	33.0323	33.0571	31.6713	27.3387	32.2666
2000	26.7548	26.8424	33.0948	39.54	38.1729	37.5723	31.6052	31.6577	32.8947	36.6574	31.798	28.5681	32.9356
2001	25.4655	29.5261	33.3713	37.6237	38.9755	34.6223	29.3155	30.4432	34.4557	35.0871	31.405	28.4506	32.3953
2002	25.1426	27.9918	34.1616	38.6187	40.1806	37.8257	32.8797	30.6803	32.9653	36.6487	32.1007	29.0435	33.2053
2003	26.3897	28.0311	33.6929	38.4153	39.9716	37.1543	31.3316	30.2842	31.185	34.3619	31.532	27.2242	32.4778
2004	25.7323	29.3931	36.92	38.7157	39.0397	36.9623	33.6532	29.25	33.862	32.64	31.6533	27.9139	32.9722
2005	23.9981	27.4496	33.7894	37.479	39.6671	38.3397	32.4168	30.9294	32.1107	33.8152	31.3523	26.1494	32.3035
2006	26.5181	32.7261	32.8887	38.0393	40.1632	37.0537	31.2626	28.5352	32.057	33.9871	30.4603	27.031	32.5386
2007	25.8213	28.7814	32.8681	39.128	39.5635	37.2303	31.4826	30.771	32.817	34.12	32.206	26.2119	32.5844
2008	23.9768	26.7121	34.9345	37.247	37.7829	34.905	31.8684	29.7216	32.4477	35.129	30.8583	28.0868	31.9806
2009	26.0419	30.1186	34.9494	38.2277	40.1361	37.8913	32.6397	31.7158	34.2943	34.0048	29.455	27.1077	33.0516
2010	26.059	29.8514	36.1906	39.915	41.6955	38.471	32.8974	30.5316	31.489	34.4394	28.4393	25.1032	32.9307
2011	24.9545	28.0246	34.3106	37.6753	39.3897	37.2957	32.3997	30.0539	30.2897	33.9619	31.6107	27.1152	32.2701
2012	23.2706	26.9124	33.3261	37.245	39.3277	37.5023	32.9239	29.7829	30.766	33.9039	29.861	26.9748	31.821
2013	24.6006	27.3864	33.8429	36.743	40.049	35.746	30.5316	29.3432	32.3927	32.0319	29.195	25.5471	31.4615
2014	22.7034	26.1175	32.2897	37.7135	39.192	38.9635	33.6565	31.1507	31.0957	34.4109	31.3148	25.8955	32.0608
2015	24.0491	29.4791	31.9937	37.0068	40.816	36.6799	31.9653	30.9865	33.4829	35.1904	31.2683	27.1392	32.5066
2016	27.0263	29.1945	34.5458	37.872	40.2791	38.5846	31.8332	29.427	32.7692	32.729	31.2864	29.0191	32.8761
2017	24.8624	29.3698	33.9764	38.5718	40.2706	36.859	30.2495	30.6391	32.7525	35.6066	30.0374	25.9252	32.4285
2018	27.0101	29.9545	34.9903	38.7452	41.1458	37.7402	31.2228	30.0708	31.394	35.2229	31.5766	26.0191	32.9275
2019	25.0181	26.9382	32.1714	39.034	39.2258	38.4612	33.2567	29.8028	31.0858	32.0446	29.0213	24.6179	31.7331
2020	23.2319	28.5085	30.7797	37.8268	40.4858	36.6343	33.9634	30.5374	32.9235	34.1827	29.501	26.7134	32.1039
2021	25.3554	30.4641	35.6628	38.387	37.4372	35.9248	32.9087	31.3304	30.932	32.5886	29.7483	24.6351	32.1102
MEAN	25.1255	28.154	33.2537	37.4494	39.4019	37.0337	31.9285	30.1637	32.0636	33.8128	30.4464	26.7764
STDEV	1.08081	1.53604	1.46277	1.20266	0.955961	1.14535	1.20212	0.962007	1.40225	1.39057	1.0262	1.04892
CV	4.30163	5.45585	4.39881	3.21143	2.42618	3.09272	3.76506	3.18929	4.37334	4.11256	3.37053	3.91734
