# Supplementary material
Source: Research Square preprint supplement (doi:10.21203/rs.3.rs-9151742/v1)
Supplement: Supplementary file 3 [file 933b32278f17604b1bdf2520.xlsx]

## Sheet: Ajmer
Row Labels	Jan	Feb	Mar	Apr	May	Jun	Jul	Aug	Sep	Oct	Nov	Dec	Ajmer Annual Rainfall (1951-2021)
1951	0.1741	0	1.6473	13.4646	1.5594	7.3267	92.6785	83.4839	0	0	15.7702	0	216.105
1952	0.675	3.5562	0.2346	5.1834	0.8447	108.038	299.989	54.0955	3.1651	0	0	0	475.782
1953	2.6113	0	0	0	0.6428	39.8279	127.306	281.761	11.1953	0	0	0	463.344
1954	0.48	3.7115	0.3456	0	0.9336	44.65	193.598	90.0751	63.7384	1.1517	0	0	398.684
1955	0	0.9106	0.4017	0	0.4859	19.2211	34.1501	261.486	121.626	82.9472	0	0	521.229
1956	0.8168	0.1071	1.7676	0	0	12.1376	379.632	79.8189	17.1178	176.819	0	0.7499	668.966
1957	31.8222	0	0.3311	0	0	23.4998	142.066	243.758	25.841	0	0	0	467.318
1958	0	0	0	0	0	21.1195	260.869	92.6885	131.986	1.4378	34.9119	0	543.013
1959	0	0	0	0	16.4425	2.4312	185.267	194.62	224.298	39.2659	16.1477	0	678.473
1960	0	0	0	0	0	79.4001	91.8422	184.265	10.0182	0	0	1.4378	366.963
1961	6.6535	14.2576	0	0	0	22.4545	105.654	117.356	214.863	0	0	0	481.239
1962	1.8351	10.4661	3.9129	0	0.5956	0	156.743	39.1726	19.7561	0	0	0	232.481
1963	0	0	0	2.9903	0	54.5348	140.764	243.004	52.0182	0	0	0	493.311
1964	0	0	0	0	89.0755	0	84.5122	296.529	28.738	0	0	0	498.855
1965	0	0	0	0	0	8.5224	126.635	107.416	1.5823	6.0134	0	0	250.169
1966	0	0	0	0	0	111.492	138.939	59.6469	94.1168	0	0	0	404.195
1967	0	0	36.9039	0	0	42.6044	51.1821	190.257	69.5763	0	0	21.4096	411.933
1968	0.912	0	0	0	6.7282	0	266.508	54.6106	0	2.9903	0	0	331.749
1969	11.6354	0	2.2427	0	0	1.5685	82.5683	80.4968	53.6149	0	0	0	232.127
1970	0	46.4701	0.1901	0	0	54.692	146.329	300.428	54.7661	0.5334	0	0	603.409
1971	0	0	0	0	34.1994	335.099	124.589	58.8939	113.515	4.857	0	0	671.154
1972	0	1.4952	0	0	0	47.2735	25.0873	167.692	0	0	0	0	241.548
1973	3.027	2.2427	0	0	9.0795	14.2375	108.953	362.714	108.738	0	0	0	608.991
1974	0	0	30.027	0	19.2602	46.4382	349.549	23.7362	4.4855	75.8894	0	0	549.385
1975	0	0	3.7379	0	8.9709	109.855	389.79	195.673	233.471	73.8976	0	0	1015.4
1976	0	5.9302	0	0	76.1888	1.0457	275.741	398.37	197.984	0	43.4713	0	998.731
1977	22.562	0	0	6.4026	33.656	259.778	481.567	242.756	79.0332	0	0	0	1125.75
1978	0	14.9058	5.9806	0	0	97.785	145.701	63.1093	64.2252	1.0457	0	0	392.753
1979	5.2331	21.4533	3.7379	1.4952	52.5595	67.4209	406.555	145.256	0.8873	2.6166	30.5341	4.4001	742.149
1980	0	0	4.1636	0	5.1334	57.0688	97.6325	34.1423	6.0644	0	0	26.7843	230.989
1981	7.7692	0	0.2933	0	7.9678	68.1618	278.176	44.1863	69.0653	0	14.5728	0.2933	490.486
1982	28.8408	2.3544	8.0338	29.5992	6.7096	2.3448	280.948	212.645	7.6835	8.1168	15.2155	2.7218	605.212
1983	0	0.2933	0	60.2604	33.7929	25.8908	337.041	172.55	76.1286	14.7395	0	0	720.697
1984	0	0	0	0	0	5.2399	60.5962	226.236	88.1715	0	0	0	380.244
1985	0	0	0.7843	0	10.8285	2.2427	57.0443	134.006	8.2466	17.3886	0	2.9903	233.531
1986	0	18.6468	0	0	33.501	32.9835	165.103	43.7246	33.5383	0	0	0	327.498
1987	3.8882	8.3953	0	0	20.924	65.0622	60.8688	94.8117	0	0	0	17.6301	271.58
1988	2.2427	0	4.4855	0	0	49.9172	197.187	70.1552	105.285	0	0	0	429.273
1989	17.9419	0	0	0	0	9.641	76.2507	197.87	17.9403	0	0	1.1214	320.765
1990	0	40.7229	0	0	10.5671	71.2661	65.9342	193.086	72.1628	0	0	0	453.739
1991	0	0	0	10.4661	0	0.3722	67.8471	113.572	67.8349	0	0	7.4758	267.568
1992	12.501	0	0	0	0	0	207.359	315.334	94.0737	0.3722	0	0	629.641
1993	0	4.1271	0	1.5429	1.1247	25.4911	325.021	42.1657	53.1686	6.6546	0	0	459.295
1994	26.3452	0	0	0	0	69.0987	318.275	82.4996	35.1033	0	0	0	531.322
1995	0	4.1287	3.2323	4.4855	0	15.8295	432.452	123.426	30.7014	0	0	0	614.256
1996	9.3825	0.3493	5.2146	1.9885	2.4498	119.076	231.649	246.021	148.136	0	0	0	764.267
1997	0	0	1.6048	19.2333	15.412	70.6256	110.681	229.066	104.583	43.8996	13.8926	0.5617	609.56
1998	0	0.8565	0.3643	10.1459	0	32.4111	110.232	150.335	91.8645	81.7155	0	0	477.925
1999	0.1337	0.8024	0	0	0.7355	66.6641	88.4954	70.1549	61.8463	39.6217	0	0	328.454
2000	0	0.2675	0	0.1337	5.0838	21.5483	135.32	77.8006	27.7721	1.4952	0	0	269.421
2001	0	0	0	15.3245	187.34	66.3208	113.467	66.5551	10.0163	8.7223	0	0	467.747
2002	0	2.4685	0	0.5041	25.0983	46.1197	15.1056	48.5898	7.5324	0	0	12.9314	158.35
2003	0	33.7456	0	0	0	15.2776	144.996	143.195	21.8503	0	0	0	359.064
2004	1.2749	0	0	0	24.0591	12.2949	66.0828	153.52	6.2264	5.0874	0	0	268.546
2005	0	1.2749	3.1891	12.9266	0	24.3208	130.281	46.6281	136.095	0	0	0	354.716
2006	0	0	16.0161	0	16.2976	22.2459	57.7104	108.17	26.3938	0	0	0	246.834
2007	0.1821	1.2037	6.3011	0	0	42.9894	151.853	119.102	39.2648	0	0	0.1605	361.057
2008	0	0	1.0017	11.9134	10.1156	65.2903	87.7722	269.371	120.188	2.8728	0	0	568.526
2009	0	0	3.2931	0	7.6814	13.5542	90.4444	57.5399	13.6857	0	1.1838	0	187.382
2010	0	0.3056	0	0	0	5.1496	164.346	203.294	51.2697	0	41.006	1.653	467.023
2011	0	58.515	0	0.4553	0	116.642	137.971	221.096	132.886	0	0	0	667.565
2012	0	0	0	18.3441	37.9198	18.8621	103	396.54	169.214	1.9671	0	0	745.847
2013	0	6.3432	0	0	0	37.7918	66.3397	57.0698	162.427	1.2179	0.8903	0	332.08
2014	5.0305	18.2311	0.4452	2.5315	16.6117	0	64.9586	113.146	100.45	0	0	0	321.405
2015	3.251	0	34.4957	7.7559	0	16.2865	181.041	77.9749	0.343	0	0	0	321.148
2016	0	0.1966	0	0	0	37.5131	72.3861	125.465	7.4682	35.6355	0	0	278.664
2017	5.0288	0	4.9134	0	5.564	108.493	81.3423	94.5388	16.2901	0	0	0	316.171
2018	0	0	0	0	0	30.1573	59.2042	58.4638	81.7691	0	0	0	229.594
2019	7.0331	0	0.1484	4.859	0.8046	2.8944	141.437	324.857	28.6443	3.2646	0	5.7969	519.739
2020	0	0	17.8846	1.5969	38.411	1.0421	160.829	114.349	32.6941	0	3.1558	0	369.963
2021	17.514	0	2.9249	0	106.132	25.8443	46.4897	67.8774	91.8042	4.1595	0	0	362.746
MEAN	3.33517	4.63007	2.96128	3.43103	13.8238	44.4011	158.534	147.244	62.7639	10.5126	3.25003	1.52279	456.41
STDEV	7.12357	11.1898	7.30488	8.87563	29.4339	54.9843	107.698	94.7631	59.2765	28.1224	9.35869	4.81281	198.206
CV	213.59	241.677	246.68	258.687	212.922	123.835	67.9336	64.358	94.4436	267.511	287.957	316.053	43.4272

## Sheet: Banaswara
Row Labels	Jan	Feb	Mar	Apr	May	Jun	Jul	Aug	Sep	Oct	Nov	Dec	Banswara Annual Rainfall (1951-2021)
1951	0	0	0	0	0	42.9997	217.766	123.216	8.8955	0	0.7448	0	393.622
1952	0	0	0	0	0.3958	75.9798	839.819	203.449	12.0234	0	0	0	1131.67
1953	4.5787	0	0	0	0	261.638	157.273	330.434	64.2417	8.7012	0	0	826.867
1954	0	1.2441	14.0547	0	0	52.4394	387.322	108.281	823.363	15.1009	0	0	1401.81
1955	11.0989	0.1259	0	0	0	130.691	24.0587	475.32	333.983	83.536	0	0	1058.81
1956	0	0.21	0	0	0.4015	88.8037	399.677	134.167	54.7727	186.432	0	0	864.463
1957	0.4819	0	0	0	0	79.0334	21.3917	353.764	91.8034	25.2694	0.5039	0	572.248
1958	0	0	0	0.1168	0	14.7572	341.928	183.41	505.366	1.2289	2.1001	0	1048.91
1959	0	0	0	0	0.6645	2.1277	472.04	375.62	309.204	133.2	2.6507	0	1295.51
1960	0.7375	0	0	0	0.1826	94.8654	157.29	308.504	38.7325	14.0263	0	0	614.339
1961	0	0	0	0	0	9.1057	280.383	141.397	608.722	16.0664	0	0.168	1055.84
1962	0	0	0	0	1.9619	21.9433	227.17	273.158	174.713	0	0	1.0223	699.969
1963	0	0	0	0	0	4.8049	338.491	421.488	265.881	8.0878	35.7675	0	1074.52
1964	0	0	0	0	24.4674	76.8479	268.473	239.613	141.32	0	0	0	750.72
1965	5.2239	0	0	0	0	0	274.77	52.1737	62.8704	0	0	0	395.038
1966	0	0	0	0	0	55.6967	162.005	102.497	92.986	0	0	0	413.185
1967	0	0	31.9978	0	0	108.594	165.337	257.766	158.267	0	0	104.556	826.518
1968	0	0	3.7722	0	0	0	427.277	388.45	28.9058	4.3303	0	0	852.736
1969	0	0	0	0	0	90.5261	351.135	455.061	199.379	0	0.3578	0	1096.46
1970	0	0	0	0	0	293.783	178.645	228.934	173.975	1.4028	0	0	876.74
1971	0	0	0	0	1.9036	260.359	395.09	323.912	252.923	11.0475	0	0	1245.23
1972	0	3.0857	0	0	0	186.97	188.115	320.465	9.4908	0	0	0	708.127
1973	0.1533	0	0	0	9.2428	78.6689	512.082	682.944	567.888	20.058	0	0	1871.04
1974	0	0	0	0	33.5108	54.8083	348.124	231.481	35.7198	158.808	0	0	862.452
1975	0	0	0	0	0	149.515	188.85	417.735	311.135	76.44	0	0	1143.67
1976	0.146	0	0	0	0	222.233	284.968	699.986	155.552	0	97.2861	0	1460.17
1977	0.7156	3.0396	0	0	29.533	349.452	316.516	305.266	230.8	4.2693	13.2905	0	1252.88
1978	0	0	0	0.146	0	80.0084	514.387	655.822	37.7403	0	69.6056	4.6097	1362.32
1979	0	4.3145	0	0	0.2921	85.0058	81.2795	368.883	50.2804	18.2441	113.456	0	721.756
1980	0	0	0	0	0	256.803	195.587	272.731	31.6643	0	0	22.1309	778.916
1981	1.6339	0	0	0	24.3962	135.559	303.198	629.196	175.479	42.7757	34.1752	0	1346.41
1982	4.4685	0	0	17.5405	22.849	24.1642	323.466	406.838	16.8745	0.3436	102.29	0	918.834
1983	0	0	0	15.688	0	99.2125	320.511	328.598	107.722	55.5423	0	0	927.273
1984	0	0	0	0	0	29.0452	297.123	842.413	49.1228	0	0	0	1217.7
1985	0	0	0	0	0	8.1379	98.6373	232.707	0.6572	207.624	0	0	547.763
1986	0	0	0	0	0	94.0575	874.678	295.623	0.3651	0	0	0	1264.72
1987	7.4575	0	0	0	0.1232	77.7197	25.2602	733.539	15.7481	58.8154	0	2.4992	921.163
1988	0	0	0	3.3166	0	52.2002	310.876	411.682	205.915	70.1873	0	0	1054.18
1989	0	0	0	0	0	110.651	177.774	321.401	67.3853	0	0	0.432	677.643
1990	0	0	0	0	43.1238	163.995	384.003	595.46	275.019	10.5009	20.3349	0	1492.44
1991	0	0	0	0	0	38.1319	648.9	349.547	17.3976	0	0	0	1053.98
1992	0	0	0	0	15.2405	50.3474	240.533	175.79	306.363	95.0653	37.1736	0	920.513
1993	0	0	13.0432	0	0	82.6791	596.559	346.308	111.796	0.8993	0.257	0	1151.54
1994	37.1187	0	0	0.613	0	326.733	442.34	671.547	493.288	0	4.4158	0	1976.06
1995	37.8491	0	0	0	4.172	28.017	519.52	162.492	140.926	52.4841	0.257	22.4383	968.156
1996	0.9329	0.191	4.3271	0	3.4378	19.2581	169.516	305.219	259.284	39.4434	0	0	801.61
1997	2.8362	0	0	10.7363	1.7394	64.7416	209.579	211.325	46.7486	5.547	0.764	8.3789	562.396
1998	0	0	0	0	0	52.555	172.754	93.3147	111.858	31.6397	0	0	462.121
1999	0	1.3327	0	0	1.0661	49.719	176.135	32.2189	66.0006	11.978	0	0	338.45
2000	0	0	0	0	8.9345	35.7095	329.815	44.8471	28.0628	0	0	0.1714	447.541
2001	0	0	0	0	0	114.966	322.484	271.604	9.9265	5.5391	0	0	724.519
2002	0	1.188	0	0	0	162.805	11.3803	181.99	119.928	0	0	0.6895	477.981
2003	0.191	20.4708	0	0	0	192.606	348.677	231.831	189.146	0	0	0	982.922
2004	0.4985	0	0	0	6.8527	65.1188	171.551	685.145	55.0597	19.3938	0	0	1003.62
2005	0	0	0	0.4869	0.9322	59.1815	321.444	164.202	371.551	0	0	0	917.798
2006	0	0	0	0	0	156.893	562.123	774.143	449.348	10.1433	1.0053	0	1953.66
2007	0	1.337	0	0.764	0.1621	88.2046	464.674	500.736	244.922	0	0	0	1300.8
2008	0	0	0	0	0.573	82.5775	192.784	154.364	104.394	31.3429	6.8002	0	572.837
2009	0	0	0	0	0	53.4236	300.957	262.055	93.462	15.3857	5.6432	0	730.926
2010	0	0	0	0	0	28.016	131.576	317.199	107.394	0.5765	15.2649	0	600.026
2011	0	0	0	0	0	63.2451	235.922	789.395	150.639	0	0	0	1239.2
2012	0	0	0	0	8.6148	7.5701	405.689	568.141	233.274	0	0	0	1223.29
2013	0	10.1121	0	43.9496	0	123.19	533.885	276.085	159.186	84.4395	0	0	1230.85
2014	53.5272	8.8112	0	0	0	0	298.854	128.268	224.903	1.0644	0	0	715.427
2015	0.1763	0	7.6411	19.8458	0	165.712	433.689	146.297	45.2538	0	0	0	818.615
2016	0	0	0	0	0	45.9193	391.323	891.766	114.63	188.049	0	0	1631.69
2017	0	0	0	0	2.8649	84.2237	542.039	286.854	152.742	0	0	0.1124	1068.84
2018	0	0	0	0	0	250.941	293.844	242.964	103.028	0	0	0	890.778
2019	0	0	0	0.1405	0	64.7373	242.969	392.606	574.178	25.9949	7.9383	0	1308.56
2020	0	0	2.2866	0	0.1405	77.9629	163.376	768.555	138.645	18.0362	0	2.371	1171.37
2021	1.1442	0	0	0	32.6819	167.332	405.213	168.345	283.453	35.4915	0.1967	4.6626	1098.52
MEAN	2.40803	0.781163	1.08624	1.59639	3.95015	96.1369	311.449	349.698	172.587	26.8247	8.06028	2.45411	977.032
STDEV	8.88448	2.92676	4.47902	6.35361	9.33571	81.4836	170.441	211.641	166.942	47.71	23.2562	12.8865	359.75
CV	368.953	374.667	412.344	397.997	236.338	84.7579	54.7252	60.5212	96.7293	177.859	288.528	525.1	36.8207

## Sheet: Bharathpur
Row Labels	Jan	Feb	Mar	Apr	May	Jun	Jul	Aug	Sep	Oct	Nov	Dec	Banswara Annual Rainfall (1951-2021)
1951	1.514	0	28.8919	0	0.7379	11.1097	54.2538	228.764	50.8582	0	20.288	0	396.418
1952	0.3824	5.0253	9.6538	1.1021	0.224	167.973	152.641	233.203	2.0771	0	0	2.8514	575.134
1953	28.8807	0	0	0.2568	0.489	6.6103	104.05	129.239	14.3279	0.3082	0	0	284.162
1954	2.0243	18.5215	1.7644	0	0	8.8311	130.743	71.9498	72.4158	53.295	0	0	359.544
1955	10.7471	0.1688	0	0.356	0	136.222	152.12	257.968	169.583	81.0554	0	0	808.22
1956	0.1309	0	8.1611	0	0	15.7457	249.796	155.856	28.303	73.4216	0	0.5107	531.925
1957	47.0859	0	18.0809	0.6955	0.8476	8.3421	192.007	247.016	233.601	20.0317	0.9618	2.5797	771.25
1958	0.9147	0.6281	1.2624	0	0	4.0823	295.236	111.621	356.855	97.6938	0	1.9568	870.25
1959	4.0318	0	0	0.5036	39.8372	4.8655	198.016	251.282	139.773	30.929	3.1405	0	672.378
1960	0.7548	0	22.5596	0	15.3278	0.9797	163.356	321.585	13.6934	15.5403	0	1.0345	554.831
1961	20.5722	13.9257	0	0.2426	0	9.0199	97.0701	333.526	15.8702	33.426	3.4238	0	527.076
1962	26.5646	8.912	3.7558	2.4171	0.3128	15.2646	193.124	171.255	168.935	5.1977	0	11.4911	607.229
1963	7.2913	0.4921	3.6194	2.65	6.2767	24.6603	65.4976	332.609	318.137	0	14.0138	7.8859	783.133
1964	0	0	0	0.5406	7.9292	2.7837	326.683	238.806	140.741	0	0	0	717.484
1965	0	0.5731	1.063	2.3876	10.799	2.4074	202.414	135.615	201.081	2.7038	0	0	559.044
1966	0	2.1908	0	0	15.49	25.4293	390.942	418.446	5.0276	0.1238	5.1549	0	862.805
1967	0	0	21.0616	2.808	0	38.3251	191.229	514.068	129.311	3.5107	0	56.3856	956.699
1968	25.8026	7.4466	12.0199	0	0	13.6738	302.941	281.963	4.8074	14.8295	0	0	663.484
1969	0.1785	0.9167	0	0.885	4.7742	1.4117	440.49	118.406	56.5986	0	0	0	623.661
1970	0.574	7.8176	0.3786	0	2.5926	44.8448	80.7851	247.288	73.7408	1.9953	0	0	460.017
1971	2.8912	13.3873	0	0.8999	5.2764	17.4283	22.9612	336.788	18.1834	7.7151	0	0	425.53
1972	15.9663	0	1.3555	0	0.5451	0.9246	195.429	66.1035	10.8543	6.1942	6.1396	0	303.512
1973	3.8805	18.7455	5.2852	0	3.2319	16.109	83.3398	247.637	88.3954	17.1806	0	0	483.805
1974	0.2322	0	0	0	1.7249	5.6851	321.172	137.778	49.2455	53.4427	0	0	569.28
1975	0.9838	4.5839	0.9792	1.5477	0	59.57	210.901	312.24	105.653	1.151	0	0	697.61
1976	0	2.4756	0	0	4.0535	22.1958	441.131	46.2274	5.2949	0	0	0	521.378
1977	11.5547	0	0	11.3714	3.0627	44.3875	15.8326	10.8674	40.4305	0.2093	0	0	137.716
1978	0	6.9559	9.9418	0.4318	0	71.2264	271.563	240.27	101.473	0	0	8.7999	710.662
1979	11.8934	42.377	0	0.3714	2.8094	23.7835	172.178	27.4416	2.7176	0	5.8973	0	289.469
1980	0	0.5667	1.2636	0	0.5572	38.5011	65.1934	45.9441	10.1274	12.1403	0.2167	5.7076	180.218
1981	3.9021	0	1.9549	0	5.542	135.025	94.5057	66.8181	9.1614	0.5966	1.7025	0	319.209
1982	14.2174	3.5996	4.8239	3.7573	13.2532	3.8518	72.1767	177.656	7.4769	0.1541	7.5861	5.3377	313.891
1983	16.2089	2.4482	0	21.3041	28.8831	31.156	219.614	366.118	154.687	17.201	0	0.7578	858.378
1984	1.0561	0	0	0	0.144	26.0754	170.362	219.553	65.8333	0.5246	0	0	483.548
1985	14.303	0	5.0908	6.0051	3.1283	30.3584	295.235	106.627	72.538	69.2208	0	9.4629	611.969
1986	6.8726	37.9556	3.4188	0	20.8064	83.863	69.4335	86.2211	57.5531	24.5278	0	3.7532	394.405
1987	5.8159	5.8677	1.2513	0	29.6057	14.1218	75.4069	155.349	68.7162	7.2231	0	18.6816	382.04
1988	3.432	0.5683	21.5606	13.4229	5.7161	50.6097	210.178	283.351	49.7185	30.0192	0	6.9365	675.512
1989	2.9424	1.2032	20.0278	0	0	49.6096	107.459	220.856	122.915	0	0	1.4417	526.455
1990	0	43.4318	0	0	9.1693	23.6597	237.996	93.3428	257.025	2.9298	3.9663	0	671.52
1991	157.202	15.121	0	1.7118	0.6516	17.4284	139.944	258.57	81.0689	0	1.7633	11.4083	684.869
1992	8.1237	3.9359	9.942	6.5737	1.658	6.6769	226.168	231.842	91.7504	99.5536	12.0076	0	698.231
1993	0	18.1779	9.298	2.3494	0	37.6966	149.407	88.8114	188.782	0	0	0	494.523
1994	30.5507	1.827	0	30.488	7.7646	36.032	312.817	130.516	7.5179	0	0	0	557.513
1995	23.0919	0	0	0	0	67.2011	118.341	443.794	84.0879	0	0	0	736.516
1996	0	39.8072	0	0.4756	8.5211	208.722	178.086	344.245	109.872	3.014	0	0	892.742
1997	0	0.4325	4.2628	1.3424	28.6145	82.6002	149.893	79.6665	45.8975	8.2164	2.9998	11.3338	415.259
1998	0	0	8.2469	2.9319	0	105.112	166.136	304.887	94.3023	23.0913	0	0	704.708
1999	7.7332	4.4374	0	0	1.9172	93.9747	210.236	196.714	179.553	13.4145	0	0	707.981
2000	1.6845	0	0	0	17.1909	115.046	138.733	80.7819	6.8555	0	0	0	360.291
2001	0.57	0	0	14.5884	49.608	216.06	234.518	68.7986	10.649	10.8431	0	0	605.635
2002	16.394	26.9544	0	0	61.8868	14.6289	72.2448	189.744	120.902	8.6538	0	19.3494	530.758
2003	16.9785	17.607	1.1983	2.6231	5.8295	35.1091	356.042	200.156	139.971	0	0	2.6284	778.143
2004	6.6605	0	0	0.2927	29.3437	33.4179	71.8392	271.718	18.6953	91.2889	0	0	523.256
2005	0	1.7752	18.1317	0.1463	12.9977	18.6555	654.264	71.544	68.2568	0	0	0	845.772
2006	0	0	28.4495	0	29.939	18.9289	193.575	72.0781	51.2271	0.8048	0	0	395.002
2007	0	59.7229	33.0232	0	13.63	103.636	98.2564	93.2299	68.2481	0	0	0	469.747
2008	0	0	0	4.242	18.7526	158.744	195.453	128.339	91.2241	1.3031	0	0	598.058
2009	0	0	0.3604	2.6617	25.9337	15.0296	102.88	174.823	89.4764	20.5916	21.8051	0.6515	454.213
2010	9.4656	5.1064	0	4.219	0.765	30.6391	177.715	135.21	308.279	0	25.1418	1.6704	698.212
2011	0	29.7094	0	3.519	7.5916	140.203	253.029	104.061	188.874	0	0	0	726.986
2012	24.3679	0	0	22.4314	0	21.9376	190.091	361.754	200.474	0.1509	0	4.6827	825.889
2013	4.5242	10.2775	1.2978	0	5.2218	30.5688	220.886	271.177	37.5473	59.8518	0	2.6094	643.962
2014	30.2553	9.6657	22.7898	0	2.6094	31.9086	109.452	131.832	57.513	0	0	0	396.026
2015	26.7671	0	64.5533	27.1431	17.7957	62.5666	114.378	137.244	11.7213	20.2833	0	3.2488	485.702
2016	0	0	3.1289	0	13.1587	52.7745	354.199	170.696	28.3096	4.7189	0	0	626.986
2017	20.6656	0	6.8979	0	12.9891	62.8102	91.0384	115.967	42.2879	0	0	0	352.656
2018	0.2846	0.8698	0	42.8094	20.6062	72.0153	437.015	244.088	209.732	33.553	0	0	1060.97
2019	28.5577	15.1575	1.1457	23.1676	8.3228	11.2187	201.225	115.101	110.826	3.9033	5.7097	7.7145	532.049
2020	7.8662	0	18.9172	4.7305	26.986	35.2263	107.975	209.848	25.9867	0	5.3787	0	442.915
2021	15.5335	0.2846	0	0.8537	53.8916	31.1546	247.172	123.529	114.789	41.2387	0	0	628.446
MEAN	10.2941	7.20639	6.20943	3.84869	10.244	45.8936	191.669	191.527	89.8368	15.9009	2.07461	2.97003	577.674
STDEV	20.5801	12.5296	10.944	8.18918	13.6308	49.1135	113.942	107.152	81.5612	25.6184	5.10683	7.70071	187.478
CV	199.922	173.868	176.248	212.778	133.061	107.016	59.4474	55.9462	90.7882	161.112	246.159	259.281	32.4539

## Sheet: Bikaner
Row Labels	Jan	Feb	Mar	Apr	May	Jun	Jul	Aug	Sep	Oct	Nov	Dec	Bikanerr Annual Rainfall (1951-2021)
1951	0	0	0	32.8362	7.1435	11.8048	25.2838	93.6518	0	0	42.5006	0	213.221
1952	0	6.4112	0	0	5.675	36.2538	46.3311	110.401	0	0	0	0.4434	205.515
1953	12.1738	0	0	0	1.6147	0.8119	27.7808	133.667	8.2497	0	0	0	184.298
1954	0	38.0651	0	0	0.8867	37.8171	48.9092	10.2639	198.219	0	0	0	334.161
1955	3.3696	1.3301	5.5715	1.7715	10.2084	49.7535	0.9671	208.874	15.3165	0	0	0	297.162
1956	7.7144	0	22.2101	0.4434	0	11.4636	94.7849	94.1677	1.3912	68.5632	0	2.9261	303.665
1957	23.0805	0	1.036	0	20.5978	35.9859	52.4918	54.8047	6.0454	0.2091	0.7094	0.4434	195.404
1958	19.3091	0	0	0	0	0	21.0399	1.5647	184.294	0.453	14.6751	6.4273	247.763
1959	0.8043	4.8139	3.5464	0.5745	9.6648	25.756	192.723	107.171	193.162	0	1.7343	0	539.95
1960	0.9958	0	0.4213	0	0.5375	52.4593	64.785	46.2944	0	0	0	14.6844	180.178
1961	7.8143	17.1239	0	0.8809	21.4476	60.7468	54.0865	75.6811	99.4646	0	6.2553	0.383	343.884
1962	0	0	3.7163	0.1053	0	0.5758	255.242	183.325	140.968	0	0	0.6894	584.622
1963	0	0	2.027	0	6.5353	0.1038	29.1134	56.2475	0	0	0	0	94.027
1964	0.3447	0	4.4208	0	21.7949	16.6284	93.2971	136.533	0	0	0	0.2298	273.248
1965	3.2327	3.3824	1.4578	3.1526	0.5362	8.5273	118.026	20.2935	0	1.6508	0.5362	0	160.796
1966	0.9958	36.5127	0	0	63.4343	22.5129	45.5505	103.583	55.3748	17.6015	1.5321	0	347.098
1967	0	0	58.112	2.3052	0	14.4512	11.881	89.1615	66.576	16.6164	11.0911	38.6795	308.874
1968	3.2266	6.1379	1.6673	0	8.9797	0	10.9261	15.9097	0	0	0	0	46.8473
1969	0	0.383	0.383	6.8992	0.8067	0	70.7473	31.2329	8.6547	2.9878	0	0	122.095
1970	12.1167	50.659	8.2945	2.6045	1.6534	24.6394	16.8429	52.0847	93.411	0	0	0	262.306
1971	1.0876	0.6992	0	7.9476	61.0144	70.8447	21.265	82.6031	8.0189	4.7324	0	0	258.213
1972	4.0983	0.3107	0	7.9224	0	69.3707	30.5968	105.74	6.8752	0.5438	0	0.3884	225.846
1973	0	0	0	0	12.4654	0.588	69.2844	103.343	6.1705	0	0	4.195	196.046
1974	0	0	0.2331	0.3107	47.2059	42.9931	201.991	1.1668	8.1558	0.2626	0	3.0735	305.393
1975	4.2621	0	6.5902	0	1.2487	38.0305	94.2317	94.9643	94.0501	0.3583	0	0.5374	334.273
1976	5.0895	0	0	6.4273	7.9214	51.4926	65.5579	97.9558	90.3919	0	2.2042	0.1816	327.222
1977	10.7239	0	0	0.121	0.9591	131.81	208.99	34.423	192.238	0	0	0	579.265
1978	0.1791	19.9134	16.932	3.1475	0	46.5425	221.087	29.4942	33.7831	0.2866	0	0	371.365
1979	9.1986	35.5039	8.3814	0.2866	44.7616	2.1136	33.649	24.8031	49.3078	15.9686	2.7484	0.8513	227.574
1980	0.2179	0	15.9687	0	4.7258	13.7639	74.0461	17.2333	25.2073	1.3802	10.4958	1.9901	165.029
1981	0.2866	1.5981	27.0686	0	25.0557	18.9576	215.939	33.9318	7.8416	0	35.8636	0.6836	367.226
1982	9.7656	0.865	31.059	27.1756	71.837	35.7021	38.7397	128.353	13.8505	13.9393	0	1.017	372.304
1983	1.5059	0.2903	11.2911	56.4815	84.1697	53.4269	131.534	148.199	39.5794	2.3912	0	0	528.869
1984	0	6.8099	0	0.6449	0	0.4658	17.0473	66.892	31.7265	0	0	0	123.586
1985	0.1791	0	1.0646	5.0992	13.5532	15.369	57.4882	65.579	0	0	0	0.215	158.547
1986	1.1824	16.2689	1.1616	0	7.5739	81.166	156.676	40.8647	6.5251	0	0	0	311.418
1987	3.1635	0.7882	8.4046	0	40.4292	120.554	11.5775	18.4221	0	0.2866	0	0	203.625
1988	0.2866	0	32.9843	0.215	0	41.1709	47.959	38.1596	39.719	26.9797	0	0	227.474
1989	25.3902	0	0.1433	0.5016	0	7.7979	139.366	87.4317	13.5471	0	0	0.8598	275.037
1990	0	45.3062	0	2.4005	79.8317	0.5089	50.2197	102.48	5.8494	0	0	0	286.597
1991	0	11.6807	0	16.4952	43.7034	27.2236	8.5728	20.3678	1.4314	0	0	5.7034	135.178
1992	3.7155	20.0465	3.7155	0	4.596	5.2907	81.9722	126.731	91.9158	22.0377	0	0	360.021
1993	6.2474	4.8314	0	0	3.1301	23.0424	134.512	9.0724	49.9794	0	0	0	230.816
1994	17.0141	0	0.3225	5.6546	1.3257	27.8415	226.926	36.3738	41.98	0	0	0	357.438
1995	19.2382	26.4923	0.2335	2.2547	0	6.8225	201.264	50.346	25.4819	0.3344	0	0	332.467
1996	9.1039	1.0488	7.3899	9.2592	9.408	177.334	50.5012	52.4015	5.3903	4.3965	0	0	326.233
1997	6.0464	1.3207	20.061	47.6994	27.8666	101.609	39.6003	64.6633	2.2917	146.465	0.2331	0.8934	458.75
1998	0	11.4619	4.9266	11.3633	7.351	40.1154	151.768	15.3641	28.4624	103.104	0	0	373.918
1999	8.7835	0.8545	2.8566	0	50.9408	64.7543	39.5463	17.9174	0	0	0	0	185.653
2000	1.5048	0.2866	0	0.1433	0	10.8412	121.566	17.3471	3.4741	3.1496	1.0749	0	159.387
2001	0	2.2732	0	5.9786	47.463	83.5708	24.3487	37.2817	9.2614	6.3473	0	0	216.525
2002	0	0	3.9658	0	7.1655	3.3778	0	8.8684	0.1038	0	7.1909	7.305	37.9772
2003	9.3119	24.6111	0.218	0.3392	5.0618	6.7116	169.43	15.8129	32.4705	0	0	0	263.967
2004	3.269	0	0	10.28	0	7.2453	8.9603	61.1656	19.1706	2.5937	0	0	112.684
2005	6.4239	30.4881	1.8362	0.9592	25.598	8.9081	117.761	0.5551	91.0152	0	0	0	283.545
2006	0	0	25.5739	0	25.8961	50.0899	37.0997	3.4564	47.4989	61.154	0	4.3119	255.081
2007	0	121.833	48.8186	2.992	4.451	17.9076	26.5918	54.7972	47.4743	0	0	0	324.865
2008	8.9639	0.2543	0.908	68.73	69.2349	64.9523	29.1456	75.2607	15.7947	0	0	19.0791	352.324
2009	3.9652	7.1808	8.3698	0	29.235	35.6522	173.984	13.6056	8.2797	0.109	0	0	280.382
2010	1.4714	3.7817	0	0.3017	11.4099	78.9374	54.1682	94.5929	128.069	2.1872	11.2049	5.0872	391.211
2011	0	14.7071	7.8943	2.2368	10.6345	19.0022	167.754	68.9006	97.4488	0	0	0	388.578
2012	3	0	0	5.6	45.5998	3.4	0	202.499	69.6073	4.2992	0	2.7128	336.719
2013	0.4988	14.0955	8.9393	12.5009	0	19.8545	182.834	132.569	10.8096	6.0399	1.1313	0	389.272
2014	0	0.1508	0.4646	12.2782	37.0409	69.4649	36.7945	41.7693	77.1373	0	0	0	275.101
2015	0.5279	0	66.0548	54.6329	45.879	56.4249	158.699	74.8146	1.5828	3.9231	0	0	462.539
2016	0	1.476	9.4578	0	0	69.2795	89.5506	191.917	0	23.2179	0	0	384.899
2017	0.5657	0	0.1508	11.2647	42.6947	95.548	28.8501	39.4786	16.0854	0	2.7176	3.515	240.871
2018	0	0	0.2263	6.0458	9.2345	62.2755	259.166	60.2113	0	0	0	0	397.16
2019	9.4193	0.1508	0.396	18.5299	45.2972	10.3635	21.6111	170.092	16.1545	30.5692	35.4453	7.5078	365.537
2020	15.8568	0	28.0674	8.169	21.3946	8.4878	36.8915	108.569	36.1685	0	0	0	263.604
2021	0	0	1.4336	2.3649	9.5547	64.8316	56.3943	35.0008	124.126	7.3749	0	0.7206	301.801
MEAN	4.32004	8.34083	7.41447	6.84969	18.6681	36.2552	83.1594	68.2923	40.037	8.48611	2.66682	1.91176	286.402
STDEV	6.02955	18.1691	13.5122	13.9086	22.5069	35.427	71.0983	51.7475	51.976	23.7189	8.05098	5.48953	113.649
CV	139.572	217.834	182.241	203.054	120.564	97.7156	85.4965	75.7736	129.82	279.502	301.894	287.145	39.6818

## Sheet: Jaisalmer
Row Labels	Jan	Feb	Mar	Apr	May	Jun	Jul	Aug	Sep	Oct	Nov	Dec	Jaisalmer Annual Rainfall (1951-2021)
1951	0	0	8.7787	0.7251	15.7147	9.1994	12.9808	63.5221	0	0	0	0	110.921
1952	0	5.2429	0	0	7.5013	3.8751	72.1088	60.5605	0	0	0	1.2344	150.523
1953	7.2164	0	0	0	3.2268	20.8562	122.412	175.415	25.6447	0	0	1.2344	356.006
1954	1.9253	4.8426	0	0	0	17.8511	203.865	10.7522	27.8794	2.8486	0	0	269.964
1955	2.3438	0.7069	4.7158	0	11.1094	0	0	329.508	33.8919	0	0	0	382.276
1956	0	0	0	0	0	9.8241	158.07	67.7379	0	0.8514	0	3.2014	239.684
1957	7.7087	0	0	0	17.702	8.0676	63.1226	89.7972	0	0	21.8671	2.984	211.249
1958	0	0	0	0	0	0.1726	74.8554	51.1211	38.5902	8.9465	25.3099	8.8423	207.838
1959	1.0105	3.3597	5.4252	13.7293	0	0	139.757	18.7776	18.1861	0	0	0	200.246
1960	0	0	0.9242	0	0	1.288	72.7984	45.1513	0	0	0	0.3942	120.556
1961	2.9197	10.927	0	21.1272	0	240.444	32.6238	37.2248	100.157	0	0	0	445.424
1962	1.7718	3.0657	7.934	4.1423	0	24.2833	155.699	45.9459	30.7417	0	0	0.1662	273.75
1963	0	0	0.1201	1.4066	1.2815	0	4.6373	38.6447	3.2933	0	0.8671	0	50.2506
1964	0.831	0	0	0	10.9062	34.2696	22.9425	23.6	2.1579	0	0	0	94.7072
1965	0	0.163	0.8885	0	3.6502	0.6476	47.5547	19.0426	0	0	0	0	71.9466
1966	0	7.9927	0	0	7.7574	9.1292	36.3598	23.1539	3.6417	3.3234	0	0	91.3581
1967	0	0	39.8466	0	10.05	14.0735	30.502	5.1548	42.2348	0	0	25.719	167.581
1968	2.2722	19.3854	2.5265	0	0	0	45.3823	0.5407	0	0	0	0	70.1071
1969	0	0.2357	0	0	5.3836	0	9.6197	5.1016	0	0	0	0	20.3406
1970	0	11.5983	2.2722	0	6.2187	6.3909	55.354	104.476	41.7706	0	0	0	228.08
1971	13.8493	0	0	0	13.0917	11.6342	41.0858	12.1974	24.7727	4.4831	0	0	121.114
1972	0	0	0	0	0	51.5071	12.2189	7.0008	0	0	0	2.4384	73.1652
1973	0	0	0	0	1.9193	9.664	27.2851	357.007	0.9325	0	0	0	396.808
1974	0	0	0	0	23.7187	1.2084	2.2722	1.1149	2.5993	3.0649	0	0	33.9784
1975	0	0.2331	0	0	0	74.9077	57.6341	123.861	149.229	0.6944	0	3.9021	410.461
1976	1.0169	1.3988	1.7251	0	4.8324	30.977	156.576	71.6055	104.416	0	0.4663	0	373.014
1977	1.2589	0	0	0	1.5328	56.9628	87.6977	4.802	15.1831	0	0.1917	1.119	168.748
1978	0	4.0016	2.5561	5.1738	0	6.7309	167.911	30.6645	13.3144	0	7.8972	0	238.249
1979	0	15.0992	0.9325	0.1865	14.196	3.8322	31.8459	104.288	19.1417	24.8058	0.4767	13.8944	228.699
1980	0	0	6.9714	0	3.7476	38.4767	83.0885	19.0895	4.6677	3.4713	0.1157	2.7223	162.351
1981	1.8992	3.7813	8.547	0	0.2798	5.9814	51.7566	113.483	14.116	0.1865	43.2472	0	243.278
1982	7.3377	4.7433	6.108	7.0656	16.5405	0.1762	90.6588	56.6151	0	0.569	0	0	189.814
1983	0.1865	0.1399	0	34.4342	14.1502	34.9072	112.201	74.8302	13.4657	0.3264	0	0	284.641
1984	0	2.611	0	1.492	0	21.0655	25.9085	47.136	40.7658	1.0724	0	0	140.051
1985	0	0	0.1865	34.3533	0	0	40.8345	16.9386	0	0	0	0.4316	92.7445
1986	0	0.6061	0.6061	0	1.5823	5.499	17.6877	44.6191	0	0.1985	0	0	70.7988
1987	0	0.3682	2.042	0	38.1412	1.6471	1.1343	0.2891	0	0	0	0	43.6219
1988	0	0	0	0	0	1.8644	61.5035	153.24	1.5853	0	0	0	218.194
1989	2.6534	0	0.1399	0	0	7.1111	73.3939	47.1366	21.3221	2.1914	0	0	153.948
1990	0	19.9823	0.2331	0.373	7.6339	0.3264	10.2667	75.6439	13.4331	0	0	1.9943	129.887
1991	0.9141	3.0163	0	0	0	37.8102	14.825	46.4854	0	0	0	0	103.051
1992	5.1873	3.8499	3.4987	0	2.0713	3.165	105.022	57.879	35.5422	2.7159	3.7721	0	222.703
1993	3.7965	1.4062	1.6319	0	2.2399	71.6011	225.456	0	41.7663	0	0.5129	0	348.411
1994	0.1399	0	1.2002	15.8861	0.2798	14.2596	90.3763	38.8514	77.2046	0	0	0	238.198
1995	11.1099	9.2162	0	26.2966	2.1914	28.4516	188.476	38.7632	1.6899	26.5511	0	0	332.746
1996	2.0534	0.3264	0.4196	0.9279	47.4855	90.3541	40.2387	13.7312	3.7984	0	0	0	199.335
1997	0.9325	0	6.1795	15.2974	20.3836	63.335	4.8769	27.4712	8.905	26.6856	1.3988	0	175.465
1998	0.3264	13.4257	2.0308	1.3988	0	40.39	118.012	22.4116	80.6859	27.0817	0	0	305.763
1999	0.1865	0.1598	0	0	122.076	8.8028	4.8422	218.941	0	4.525	0	0	359.533
2000	0	0	0	0	0	0	144.804	14.9932	0	3.357	0	0	163.154
2001	0	0	0.5129	3.0042	11.3766	72.8385	188.692	62.5836	0	0.4663	0	0	339.474
2002	0	0	1.5709	0	10.387	5.643	0	0.1865	19.5823	0	0.5129	10.4025	48.2851
2003	0.5595	23.389	0	1.1656	0	1.4674	70.591	88.1989	0	0	0	0	185.371
2004	0	0	0	0.4524	0	5.5797	2.8384	33.2931	2.6724	18.7303	0	0	63.5663
2005	0	0	0.8393	2.3313	48.4214	25.2121	38.2421	5.5683	88.7173	0	0	0	209.332
2006	0	0	23.0219	5.9251	0	50.4146	13.2444	419.593	4.442	0	0	9.0947	525.736
2007	0	33.9925	18.1245	2.4929	7.8325	1.492	21.2572	95.7939	18.4288	0	0	2.4956	201.91
2008	2.25	0	0	0.8821	2.9083	12.6641	29.3046	92.2481	0.1726	0	0.4196	30.8577	171.707
2009	1.6723	0	0.3466	1.7706	0	32.651	23.4444	18.0266	0.5902	0	0	0	78.5017
2010	1.7225	0	0	3.6871	0	95.5505	73.6099	84.5867	76.5433	5.6651	13.8067	0	355.172
2011	0	4.4387	0	1.353	0.373	1.0169	51.5384	104.905	133.567	0.3453	0	0	297.537
2012	0	0	0	30.9988	1.4004	8.9995	2.3998	116.395	70.6978	0.8999	0	5.9897	237.781
2013	0.1453	19.7265	26.7641	2.02	5.2294	24.9811	20.81	108.164	2.7296	0.418	0	0	210.988
2014	0	0	0	13.9463	23.01	0.7357	38.3638	31.5543	36.0569	0	0	0	143.667
2015	0	0	24.4537	10.9932	10.5825	42.3422	182.681	63.0458	91.8368	0.2905	0	0	426.226
2016	0	2.594	0.2905	0	7.0523	32.6663	25.9136	123.814	0	1.1621	0	0	193.493
2017	5.2814	0	15.2797	1.1899	38.254	41.5026	193.021	36.7251	0	0	0	4.8146	336.069
2018	0	0	0.4842	1.1137	5.5064	43.9536	69.4448	65.0731	3.5979	0.5016	0	0	189.675
2019	15.7439	1.3212	3.4863	0.3389	26.2271	49.9045	34.7737	62.2421	61.494	33.5646	48.1386	0	337.235
2020	14.0083	0	26.7068	8.4549	2.768	5.6568	49.1503	101.86	73.1933	0	0.4842	0	282.283
2021	0	0	0	0	38.0246	56.4459	151.868	0	125.561	0	0	0	371.899
MEAN	1.72156	3.34292	3.6665	3.88924	9.54858	24.4329	66.644	67.1856	26.2903	2.95766	2.38711	1.88638	213.953
STDEV	3.4677	6.62557	7.752	8.13942	17.8096	35.4271	59.8127	78.2173	36.7783	7.41116	8.59667	5.27101	114.749
CV	201.427	198.197	211.428	209.281	186.515	144.997	89.7495	116.42	139.893	250.576	360.129	279.425	53.6329

## Sheet: Jalore
Row Labels	Jan	Feb	Mar	Apr	May	Jun	Jul	Aug	Sep	Oct	Nov	Dec	Jalore Annual Rainfall (1951-2021)
1951	0	0	0	0	37.2551	16.4408	84.1372	106.141	0	0	17.9759	0	261.95
1952	0	3.2887	0	0	0	16.4534	373.195	177.64	0.5058	0.3862	0	0	571.47
1953	14.979	0	0	0	0.6187	5.4933	66.6853	272.306	20.0677	0	0	0	380.15
1954	0	0	4.5869	0	0	34.7911	158.151	60.4021	79.3711	3.9281	0	0	341.23
1955	0	0	0	0	0.2849	1.7463	24.7769	322.255	324.993	0.2218	0	0	674.278
1956	1.3919	0	0	4.7326	0	31.5183	414.584	141.875	7.9218	72.9411	0	0.3558	675.32
1957	12.7954	0	5.5894	0	3.9736	49.4382	5.7207	250.34	0	0.1558	22.1855	0	350.198
1958	3.6049	0	0	0	1.0133	54.3564	108.007	47.2904	144.154	6.7248	11.0913	0	376.242
1959	0	0	0	5.2176	19.3616	49.4765	221.174	121.593	118.204	27.8229	10.7302	0	573.58
1960	0	0	0	0	0	45.2363	159.758	129.711	13.1754	0	0	2.8718	350.753
1961	0.8742	8.581	0	4.4262	1.3522	62.2843	86.3668	119.137	321.224	0	0	0	604.245
1962	0	12.5973	13.0615	3.4597	0	0	384.522	231.278	350.254	0	0	0	995.172
1963	0	0	5.263	0	0.1282	0.7581	12.8586	132.993	60.4038	10.4797	15.2208	0	238.105
1964	0	0	0	0	9.8314	15.1303	83.2998	226.071	4.6001	0	0	0	338.933
1965	4.8982	0	6.5119	0.835	1.8194	0	235.867	78.8701	16.4622	0	0	0	345.263
1966	0	0	0	0	1.8734	57.638	89.0255	74.4399	82.6516	0	0	0	305.628
1967	0	0	122.62	0	0.6233	21.619	33.2782	208.829	71.8606	0	0	3.7235	462.553
1968	0	0.1324	0.7942	0	3.8039	0	76.4521	26.938	4.621	1.2489	0	0	113.99
1969	0.9941	0	0	0	0	0.3099	58.9499	26.492	11.3444	0	0.4425	0	98.5328
1970	0	0.9571	3.5566	0	6.9746	64.8275	57.1185	208.153	141.202	0	0	0	482.789
1971	0	1.5871	0	0	5.5925	61.288	246.075	24.1663	26.2589	0	0	0	364.967
1972	0	9.6162	0	0	10.8852	60.0637	77.5605	294.343	0	0	0	0	452.469
1973	4.9555	0	0	0	0.4055	33.1701	82.8959	565.66	120.757	9.3669	0	1.4825	818.693
1974	0	0	0	0	70.4868	1.9772	1.1925	26.6866	8.5604	30.215	0	1.213	140.332
1975	0	0	1.7485	0	0	88.8202	268.059	127.035	138.174	115.729	0	0	739.567
1976	10.8151	3.7743	0	0	0	22.7114	76.7593	218.813	116.185	0	31.9925	0	481.05
1977	5.4341	3.8054	0	0	59.3861	88.2914	549.976	198.995	8.5451	0	0	0	914.433
1978	0	18.1658	0	0	0	46.1181	233.413	127.21	35.9674	0	38.7902	0	499.665
1979	1.0822	9.9736	0	0	71.3108	19.0652	214.828	191.52	9.5277	33.127	34.2946	0	584.729
1980	0	0	0	0.1628	0.171	50.3186	78.5057	3.8268	27.5089	0	0	19.0193	179.513
1981	5.1023	0	1.4804	0.4996	8.1227	10.4228	83.7304	66.0842	14.9923	0	62.3312	0	252.766
1982	2.1856	0	1.1495	23.8363	41.1023	6.4719	143.413	62.3704	5.4968	0.9196	12.4127	0	299.358
1983	0	0	0	15.9787	5.3742	34.8021	505.422	143.197	25.7576	34.7953	0	0	765.328
1984	0	0	0	0.1262	0	24.6447	42.8127	133.001	56.4496	0	0	0	257.034
1985	0	0	0	15.9607	10.098	0.4152	161.212	62.5679	9.1778	0.6972	0	1.2489	261.378
1986	0	7.6051	0	0	11.167	1.1961	196.973	36.9367	0.4371	0	0	0	254.315
1987	5.8726	0	0	0	7.4432	65.2029	27.9854	8.709	0	0	0	21.5407	136.754
1988	0	0	0	0.9418	0	38.3591	150.73	93.1318	35.8625	0	0	0	319.025
1989	11.7052	0	0	0	0	68.5304	46.0531	175.882	36.0244	0	0	0	338.196
1990	0	22.0184	0	0	2.4297	19.0522	481.452	354.704	90.7641	1.4959	0	0.1221	972.038
1991	0	0	0	3.1055	0	12.8753	93.9985	17.8446	17.7207	0	0	0	145.545
1992	26.3636	0.1018	0	0	17.4757	5.0699	236.7	121.687	349.747	0.5402	0	0	757.685
1993	0.1558	1.0405	0	0.1425	0.2078	17.0007	259.834	1.6026	89.6659	0	0	0	369.65
1994	12.6359	0	0	0	3.3721	47.8184	303.227	199.676	120.532	0	0	0	687.261
1995	4.157	0.1249	0.1249	0	0	15.9455	464.132	35.4667	9.5213	19.4659	0	0	548.938
1996	1.633	0	0	10.1973	8.5536	110.293	82.643	96.795	28.3983	0	0	0	338.513
1997	1.3301	0	0	0	25.3242	155.948	124.918	284.642	58.2791	19.1638	9.0579	2.6686	681.332
1998	0	0.5259	3.0007	2.0857	0	51.0405	68.3566	26.0423	44.4395	112.197	0	0	307.688
1999	2.2623	12.0917	0	0	37.1524	23.6632	64.2612	108.556	13.9145	51.657	0	0	313.558
2000	0	0	0	13.8064	5.2765	26.323	209.491	41.9046	11.403	0.1819	0	0	308.387
2001	0	0	0	2.2799	2.2979	58.7453	159.752	88.0138	0	23.2176	0	0	334.307
2002	0	0	0.1221	0.8742	0	69.9774	2.237	17.0746	62.2875	0	0	2.0657	154.638
2003	0.1923	67.1327	0	0	0.1221	127.751	296.294	176.295	14.8959	0	0	0	682.683
2004	1.4047	0	0	4.7306	0	40.3274	61.3958	142.891	28.7428	43.0509	0	0	322.543
2005	0	0	0	12.4532	7.6091	24.481	114.388	42.5107	161.416	0	0	0	362.858
2006	0	0	0	0	0.1221	83.4489	120.082	476.77	34.7305	0	2.4084	0	717.562
2007	0	16.1796	10.7852	0.1558	0	26.7224	224.908	53.86	51.387	0	0	0	383.998
2008	0	0	1.4777	7.7216	11.3735	61.8338	48.4733	117.539	63.0384	2.3829	0	8.1277	321.968
2009	0	0	5.3347	0	0	28.8374	125.824	23.2578	1.2359	0	0	0	184.49
2010	3.4889	0	0	0	0	11.9025	212.631	157.644	62.5379	3.1011	99.019	2.6403	552.965
2011	0	7.3322	0	0	6.2446	0	130.179	234.661	191.17	0	0	0	569.587
2012	1.1663	0	0	0	4.6988	32.042	67.3942	86.2405	51.6753	0	0	0	243.217
2013	16.8213	6.5153	0	0.6764	0.4071	68.7485	135.208	140.96	126.406	28.4026	0	0	524.146
2014	0	0	0	0.1039	19.4455	1.0136	62.2503	106.478	100.623	0	0	0	289.915
2015	0.2036	0	2.1137	3.6548	1.8734	78.3728	402.313	80.6361	20.8653	0	0	0	590.033
2016	0	0	0.3185	0	0	60.3096	109.288	475.408	3.0081	33.789	0	0	682.121
2017	8.9917	0	0	0.2379	37.0004	100.736	623.591	22.8853	8.8044	0	0	0	802.247
2018	0	0	0	0	2.8663	44.4964	117.291	36.2172	11.7932	0	0	0	212.664
2019	0.9684	0	0	0.2428	22.2149	18.9442	72.5507	262.474	111.42	16.2242	1.4362	0	506.475
2020	0	0	14.4623	0	14.7833	42.0333	88.9451	341.499	44.7613	17.2556	0	0	563.74
2021	0	0	0	1.2023	59.8042	31.9374	46.671	5.3819	114.34	1.4958	1.438	0.9524	263.223
MEAN	2.37275	3.00207	2.87467	1.96969	9.59316	38.6912	162.425	139.444	64.0595	10.1744	5.22291	0.958201	440.788
STDEV	4.87775	9.0336	14.7025	4.55585	16.8854	32.6161	140.274	118.564	82.0269	22.8489	15.5788	3.53221	216.657
CV	205.574	300.912	511.45	231.298	176.015	84.2984	86.362	85.0261	128.048	224.573	298.277	368.629	49.1521

## Sheet: Nagaur
Row Labels	Jan	Feb	Mar	Apr	May	Jun	Jul	Aug	Sep	Oct	Nov	Dec	Nagaur Annual Rainfall (1951-2021)
1951	0	0	0	16.1773	7.9408	4.5669	34.6795	35.405	29.3281	0	19.4027	0	147.5
1952	0	0	0	0.7728	0	10.125	72.833	89.965	0	0	0	0	173.696
1953	0.7369	0	0	0	3.6245	18.4411	143.105	571.574	43.961	0.2342	0	0	781.677
1954	2.959	19.5759	0	0	12.5535	13.0722	52.4308	10.1951	158.064	0	0	0	268.851
1955	0	5.9181	0.2944	0	1.0546	37.9899	14.6386	291.718	37.1795	1.5628	0	0	390.356
1956	0.4162	0	17.5289	0	0	69.647	185.928	52.1186	10.426	40.7491	0	0	376.814
1957	34.8216	0	11.7698	0	16.4095	36.3311	95.7085	98.233	8.9645	0	0	0.2269	302.465
1958	2.6018	0	0	0	29.677	27.6823	138.737	34.4362	237.696	5.0348	20.4202	4.4117	500.697
1959	0	1.1425	0.7887	2.9004	15.2997	5.7368	89.5522	89.4762	84.3904	12.5668	2.0394	0	303.893
1960	0	0	0.2767	0	1.1059	17.1719	58.6296	76.7083	6.9855	0	0	15.3323	176.21
1961	10.5321	8.1493	0	2.2685	4.8517	38.3857	57.7842	103.218	55.8565	0	2.1057	6.8797	290.032
1962	0	0	3.1197	0	0	12.046	396.497	134.15	58.1537	0	0.2013	22.3083	626.476
1963	0	4.1008	2.385	0.6673	0	25.5667	22.6746	67.5758	7.2199	0	0	0	130.19
1964	0	1.8985	1.4132	0	16.9925	5.1473	258.196	281.341	8.7275	0	0	4.2437	577.96
1965	2.3278	3.8368	4.4884	12.1461	1.4245	15.6324	96.2578	84.3858	1.4813	4.1521	0	0	226.133
1966	0	2.8951	0	0.5032	2.3838	37.3004	22.5457	66.1215	19.7467	1.4329	0	0	152.929
1967	0	0	39.6071	3.7945	0	68.4455	42.189	129.511	51.6674	4.3519	2.4835	21.7357	363.785
1968	27.9933	4.8786	0.5056	0.6067	30.7524	1.9444	209.493	27.3519	0	0	0	0	303.526
1969	0	0	0	0.8582	1.7395	0	76.0565	72.6089	34.34	3.8798	0	0	189.483
1970	1.2283	59.9916	2.8085	0	37.7427	16.5045	166.566	179.644	93.1007	0	0	0	557.586
1971	4.9877	0	0	0.91	29.9049	254.585	91.6927	58.9535	17.4718	7.6916	0	0	466.197
1972	0	0	0	10.3978	15.6108	43.7713	61.2879	159.807	0	0	0	0	290.875
1973	0	0	0	0	31.2444	1.7701	98.1578	470.737	9.4989	0	0	0	611.408
1974	0	0	0	1.2153	31.3251	46.886	207.165	24.0139	0	2.196	0	0.2516	313.053
1975	0	0	0	0	13.2507	40.0005	640.658	280.883	188.946	56.4915	0	0	1220.23
1976	0	9.5245	0	4.9137	47.3657	18.2723	128.762	223.583	68.5875	0	15.8584	0	516.867
1977	7.4645	3.8185	0	10.6029	11.2662	46.5371	202.243	56.8763	109.699	0	0.1253	0	448.633
1978	0	17.2578	3.8855	1.043	0	68.5886	242.241	93.6287	7.7448	0	0	9.3085	443.698
1979	11.9766	36.7697	0	0	25.296	7.7756	124.262	30.8252	14.3102	8.5824	6.6025	0	266.4
1980	0.4861	0	7.38	6.5095	23.9885	19.4476	162.276	7.626	8.6072	0	0	14.8951	251.216
1981	5.8554	0.8203	0	0	14.014	18.8146	199.968	29.0847	18.3355	0	34.6943	0	321.587
1982	30.0071	3.7462	8.1552	29.4573	82.1793	28.3392	58.9867	192.921	1.1006	20.8746	2.4305	5.8065	464.004
1983	0.7295	0	0	75.7899	79.5106	56.4842	174.758	129.875	72.985	18.0439	0	0	608.176
1984	0	3.0656	0	0	0	2.4266	74.2596	43.8364	62.5309	0	0	0	186.119
1985	0	0	0	0	6.8294	0.2785	168.455	72.1434	24.193	22.6093	0	3.6399	298.149
1986	0	5.5473	3.8315	0	52.2727	9.6427	88.5414	21.4547	2.6611	0	0	0	183.951
1987	10.7249	0	4.4269	0	46.6951	16.3861	17.0782	97.5909	0	0	0	0.1742	193.076
1988	2.9204	0	4.2142	2.2131	0	46.3894	105.454	94.9251	102.397	0.1213	0	0	358.635
1989	0.4277	0	1.9121	0	0	19.3577	108.632	134.262	38.8584	0	0	0	303.45
1990	0	26.4245	0	0	23.1499	72.1238	163.259	155.987	22.8912	8.011	0	0	471.847
1991	0	1.3388	0	11.5342	1.8837	2.4709	140.374	82.8691	3.7682	0	0	0	244.239
1992	4.2414	12.9502	0	0	5.4762	48.5494	143.534	99.5758	121.292	0.3483	0.4777	0	436.446
1993	0	0	0.1742	0	6.5766	92.2564	98.1373	4.9314	112.782	0.8707	0	0	315.729
1994	17.2818	0	0	14.0277	2.114	38.8158	50.1931	60.6427	62.9409	0	0	0	246.016
1995	8.2649	3.8916	0.1011	5.4008	3.0333	14.9464	246.969	233.426	20.5261	9.098	0	0	545.657
1996	3.1251	0	0.1213	0	32.2836	574.709	101.529	131.102	29.0446	0.2612	0	0	872.176
1997	0	0	5.9577	9.0822	83.6593	76.6912	115.543	324.618	22.5029	119.504	5.7866	0	763.344
1998	0	4.1261	14.4713	15.0979	3.7768	135.12	116.432	78.4834	23.281	74.3244	0	0	465.113
1999	8.9046	6.0033	0	0	5.3072	6.5281	164.036	30.7077	15.9953	3.3572	0	0	240.839
2000	0	0	9.4407	0	8.9663	24.9851	236.877	70.9268	4.5364	0	0	0	355.732
2001	0	0	0	23.9606	23.3076	48.2158	97.3493	112.061	5.7367	5.342	0	0	315.973
2002	0	0.5152	0	0	18.2186	28.3339	0.7837	52.3474	3.0698	0	0	4.7154	107.984
2003	3.3848	6.7376	0.1011	2.5179	0.3484	22.6182	379.465	79.7569	7.1108	0	0	0	502.041
2004	25.7012	0	0	19.8485	0	28.9082	40.419	132.366	17.4306	5.5928	0	0	270.266
2005	0	5.8119	0.4777	9.8017	6.1735	65.9435	266.261	0.9647	108.397	0	0	0	463.831
2006	0	0	9.3863	2.7881	13.5522	43.782	99.382	57.5622	13.754	10.5459	0	0.1246	250.877
2007	0	45.2287	29.2434	0.6966	3.1149	19.7622	244.789	59.7861	28.8544	0	0	0	431.476
2008	0	0	0.9554	2.7467	49.0466	35.4606	41.1262	280.449	17.6947	0	0.9579	0.3583	428.795
2009	0.2985	0.7762	5.9446	0	8.6071	22.067	57.2511	19.0833	10.1949	0.418	0	0	124.641
2010	0	0.1631	0	0.1162	0.1937	99.6251	139.818	142.237	29.0989	0	15.1516	10.3345	436.738
2011	0	9.9633	0	0	12.887	22.4469	75.6362	93.874	49.9759	0	0	0	264.783
2012	2.5088	0	0	7.9961	43.5854	6.0095	15.5495	231.179	85.2273	3.8726	0	0.567	396.495
2013	28.6942	13.4714	0	13.9681	1.8688	9.1368	122.763	107.759	91.0383	3.3178	0	0	392.017
2014	0	0	2.157	27.0939	21.0178	17.326	43.4991	133.94	83.867	0	0	0	328.9
2015	0.9624	0	28.4279	30.3654	8.4011	37.27	277.53	93.3908	3.3914	0	0	0	479.739
2016	8.858	0	1.2297	0	16.8552	59.6765	144.967	181.613	8.6706	8.6517	0	0	430.521
2017	7.7727	0	0	0	6.2411	95.273	119.961	35.3185	11.3754	0	0	0.2711	276.213
2018	0	0	0	0	1.2133	85.572	55.6605	16.4988	25.5577	0	0	0	184.502
2019	1.8811	0.8034	0	4.4379	13.5952	3.5704	91.1747	149.422	28.3082	5.2764	0.6197	0	299.089
2020	0.1549	0	16.0258	13.913	28.3592	26.2069	159.815	84.262	120.341	0	0	0	449.077
2021	6.6344	0	0	0	35.2471	28.1258	127.626	66.9989	154.991	10.5572	0	1.0978	431.279
MEAN	4.05445	4.66398	3.42263	5.6217	16.6531	43.6622	131.931	114.407	42.8009	6.75949	1.82193	1.78426	377.583
STDEV	7.93683	10.5295	7.37374	11.3308	19.7216	74.428	101.88	102.729	49.5749	18.3742	5.78404	4.70615	187.857
CV	195.756	225.762	215.441	201.555	118.426	170.463	77.2224	89.7923	115.827	271.828	317.467	263.759	49.7527

## Sheet: Sri Ganga Nagar
Row Labels	Jan	Feb	Mar	Apr	May	Jun	Jul	Aug	Sep	Oct	Nov	Dec	Sri Ganganagar Annual Rainfall (1951-2021)
1951	1.7502	0	10.7129	8.8035	16.6362	0.6726	108.507	50.5186	0	0	14.3254	0	211.927
1952	0	4.3239	9.2445	0	10.6997	22.0047	64.7422	26.1532	0	0	0	0.3051	137.473
1953	21.3358	0	0	5.056	2.2063	1.812	53.1935	84.9722	24.8903	0	0	0	193.466
1954	14.0639	21.3981	1.7736	0	2.643	36.4658	29.4952	8.8332	230.758	0.2573	0	0	345.688
1955	5.9283	9.104	8.6075	2.1082	14.3213	26.6933	1.0433	113.108	35.8003	25.445	0	2.7257	244.885
1956	13.5732	3.0562	32.459	0	0	30.6973	230.953	210.069	34.2642	12.1797	0	0	567.252
1957	40.2545	0	21.8943	5.1856	7.6982	0.7357	52.1375	25.6715	0	11.2451	0	14.2292	179.052
1958	0.5216	0.2854	4.178	0	0	1.7736	36.4173	39.237	377.885	0	0	33.2221	493.52
1959	20.8584	1.2664	0.1849	0.1747	3.3709	0.6433	92.1812	59.1488	43.8429	2.3012	4.6166	0	228.589
1960	4.4222	0	18.4659	0	0	10.8697	80.4424	48.2426	0	0	0	5.3788	167.822
1961	5.1534	6.0497	0	4.496	0.6014	29.616	36.8326	31.8959	20.9046	2.5533	0	0	138.103
1962	14.8059	0.9398	13.011	0	2.3646	19.5069	25.4735	114.478	174.889	0	0	0.6183	366.086
1963	0	0.7757	11.9251	1.9143	18.8132	0.8097	31.9447	54.9772	20.846	0	0	1.3577	143.364
1964	0.578	0.9222	0	0	0	0.9567	147.552	90.4402	2.9699	0	0	5.9413	249.36
1965	0	0	2.0685	3.0941	2.4054	2.5856	33.4732	42.2494	0.563	3.1401	0.5377	0	90.117
1966	0	10.3825	6.6388	2.419	27.1195	52.8082	37.9995	13.1805	208.89	0	0	0	359.438
1967	0	0	85.486	0.5688	0	14.821	74.0651	62.4179	20.1344	1.6415	2.9128	45.0636	307.111
1968	0.8279	4.9422	17.1825	0	1.7823	6.3477	44.137	2.0685	0	1.2521	0	0	78.5402
1969	0.1237	9.029	9.3811	5.1199	1.7007	19.5033	19.0527	41.4685	39.0076	0	0	0	144.387
1970	8.9864	27.3755	0.2547	0	0.1749	23.4978	17.186	85.6289	22.5576	0	0	0	185.662
1971	2.2857	0.4365	0	0	18.0182	1.4124	35.3711	63.475	6.8599	0.2619	0	0	128.121
1972	2.2857	2.6472	0	0.2638	0	39.5047	77.9809	124.727	19.0056	0	0	2.8252	269.24
1973	0	2.5344	1.0724	0	24.3889	1.7814	24.7656	205.402	31.2385	0	0	16.6171	307.8
1974	0	0	0	0.5995	0.8393	62.914	138.575	1.8667	0	0	0	0	204.795
1975	0.2725	0	0.8034	0	0	25.2347	59.7273	95.6844	55.8463	0	0	0	237.569
1976	7.3968	11.2655	3.7565	0.5395	44.5257	46.3219	86.7459	316.627	136.063	0	0	0	653.242
1977	18.0719	0	0	27.7831	18.7123	138.54	146.567	50.8665	1.9772	0	0	0	402.518
1978	1.0858	21.6895	13.9361	2.0408	0	18.904	339.175	18.1053	3.2376	0	4.0883	0	422.263
1979	11.5886	3.9626	15.9498	0.2038	6.4159	11.2564	23.0748	30.4272	41.473	0	0	0	144.352
1980	0	0.3897	28.6277	0	13.9117	17.0063	91.8053	31.0123	22.125	7.6192	0	4.5635	217.061
1981	9.5255	48.3228	17.412	0	0	0	124.172	46.8126	27.0647	0	27.6262	0	300.936
1982	17.7812	20.6359	16.1659	35.6323	38.9811	22.6105	52.375	77.0121	16.6084	0	11.4418	0	309.244
1983	20.8384	6.454	3.4673	31.0725	3.2372	9.5601	203.52	169.171	59.1488	0	0	0.2997	506.769
1984	0	19.5555	1.1463	0.6359	0	0.8992	98.8881	87.8106	63.31	0	5.0257	0	277.271
1985	0.1287	0.1287	0	30.2925	17.9554	33.1332	162.475	82.5979	13.1392	2.8236	0	13.0371	355.711
1986	4.3519	15.2806	0.6121	19.2538	33.6415	128.255	128.186	26.9986	15.9375	0	0	0.5538	373.071
1987	6.7286	1.626	24.1749	13.5452	54.007	9.5136	59.5339	38.6429	13.3029	6.2955	0	0	227.37
1988	0.3112	8.8573	6.7195	6.321	0	21.8848	79.8777	119.754	30.9858	0.3242	0.1037	0.9639	276.103
1989	33.9899	0	7.0025	0	0	81.6425	69.3864	40.8431	0	0	5.0457	10.1716	248.082
1990	0	49.9651	0.3398	0	8.0441	25.6633	101.286	48.856	63.1359	0	1.5027	16.1779	314.971
1991	0	33.9929	0.4227	29.843	1.437	88.6798	0.1697	12.1241	20.6087	0.1037	0	4.3519	191.733
1992	3.1733	33.0677	0	1.1876	0.2373	1.1876	91.8774	102.967	81.1401	0.5758	3.75	0	319.164
1993	0.7883	0.4113	18.061	1.0789	12.8728	31.317	96.9221	0	22.7026	0	0	0	184.154
1994	4.4363	0.1452	2.3092	4.2585	1.1546	3.0317	135.211	45.1635	112.755	0	0	0	308.464
1995	15.0262	26.539	0.8483	7.9198	1.8088	45.093	119.96	117.122	3.5578	10.1926	0	0	348.067
1996	0	0	2.994	0	0	98.0528	41.9157	83.0829	0	26.9458	0	0	252.991
1997	0	0	30.6883	14.9699	7.4849	14.2214	104.041	112.274	5.988	26.1973	2.994	8.9819	327.841
1998	0	20.9578	2.994	2.2455	4.491	27.6943	57.6342	21.7063	122.753	29.1913	0	0	289.667
1999	26.1973	2.994	5.988	0	33.6823	53.8915	62.125	8.2335	2.2455	0	0	0	195.357
2000	0.1975	0.2396	0	0	0	2.5333	116.224	19.0313	5.6396	0	0	0	143.865
2001	1.497	0	0	4.491	63.622	80.8373	215.566	6.7364	0	0	0	0	372.75
2002	0	12.469	0.6614	0	32.8598	43.8713	1.2956	1.6072	25.0008	0.3409	0	12.2094	130.315
2003	0.3273	55.7978	0	0	0	64.035	147.542	88.7325	50.2577	0	0	0	406.693
2004	1.9708	0.111	0	0	20.6102	121.504	1.1098	31.5909	3.5181	17.2046	0	0	197.619
2005	10.4108	47.5044	43.0869	5.9512	13.7091	43.2756	34.9646	0	30.4731	0	0	0	229.376
2006	0.4318	0	3.1589	0	30.8308	57.4052	232.782	17.5667	6.8486	0	5.6644	0.5455	355.234
2007	0	83.0525	11.085	13.6331	0.523	222.736	57.1973	9.4153	60.3688	0	0	1.5592	459.571
2008	9.2962	11.0408	0	14.2406	16.6825	107.466	73.5613	66.0203	27.1472	0	0	0.1364	325.591
2009	17.8763	22.3291	11.3118	5.2695	5.7415	5.8544	170.097	35.1368	41.9732	0	0	0	315.59
2010	1.5349	16.419	0.7098	0	1.4888	31.2514	65.3764	66.8902	67.4236	0	0	4.0996	255.194
2011	0	23.8933	0	13.061	25.6159	17.5138	64.5958	183.946	206.917	0	0	0	535.543
2012	2.5	0.8	0	16.6	1	14.3	75.1	37.6	185.11	11.1926	0	5.1191	349.322
2013	1.8601	44.099	0.9709	4.819	0	18.124	108.711	92.6378	1.8236	0	2.3004	0	275.346
2014	0	11.765	21.1199	3.484	23.2483	28.097	62.8744	29.1842	173.568	1.9379	0.2998	0	355.579
2015	1.7765	2.3117	54.5464	13.8872	1.1112	35.7876	71.152	46.8588	50.2345	3.7653	0	0	281.431
2016	0	5.7906	13.7831	0	0.5485	7.1836	25.9103	104.66	1.751	0	0	0	159.627
2017	3.8898	1.2059	0	6.3116	11.6893	40.2842	37.7516	15.1594	38.0548	0	3.8559	8.4856	166.688
2018	1.273	0.6528	0	6.0364	0.8352	50.4358	60.913	4.071	11.5454	9.6498	0	0.114	145.526
2019	0.8161	13.8293	4.4789	23.2503	28.3314	16.0968	55.5237	26.3565	13.4752	1.1461	20.3706	7.8125	211.487
2020	22.1933	0	45.2832	1.4711	7.6294	14.0968	43.7074	58.7379	30.2882	0	1.2509	0.9047	225.563
2021	3.1907	0	3.8933	7.6249	6.598	18.1738	15.7304	0.2404	54.3502	20.1048	0	0	129.906
MEAN	5.92238	11.0566	9.47957	5.75715	10.5783	33.8435	81.2375	60.9338	46.9885	3.32237	1.65792	3.2165	273.994
STDEV	8.76256	16.526	14.8925	8.78136	14.1032	39.4241	62.2014	57.1346	68.318	7.14849	4.6227	7.50814	116.499
CV	147.957	149.467	157.101	152.53	133.322	116.489	76.5674	93.7649	145.393	215.163	278.825	233.426	42.5187

## Sheet: Tonk
Row Labels	Jan	Feb	Mar	Apr	May	Jun	Jul	Aug	Sep	Oct	Nov	Dec	Tonk Annual Rainfall (1951-2021)
1951	0	0	10.9362	0.1475	0	47.3167	57.7819	159.281	0	0	16.5133	0	291.977
1952	0	0	0	0	0	116.25	159.234	334.854	2.7058	0	0	4.7313	617.775
1953	72.4539	0	0	0	0	83.7022	195.393	366.893	27.8508	6.3274	0	0	752.62
1954	0	30.5405	1.1073	0	0	77.5273	265.331	72.6415	146.729	53.4897	0	0	647.366
1955	13.6406	3.2213	0.7358	0	0.1209	93.8802	79.6658	346.902	133.938	69.5029	0	0	741.607
1956	3.2145	0	17.5194	0	0	16.0225	529.304	335.408	57.1379	126.008	0	9.6082	1094.22
1957	36.6161	0	20.6118	0	0.8444	49.6692	432.704	220.49	73.1452	6.3852	0	1.749	842.214
1958	2.6977	4.5563	0	0	1.8869	47.4167	299.541	207.362	122.312	0.1572	6.067	0	691.996
1959	1.2944	0	0	0	16.6876	36.4725	247.186	404.874	220.946	11.7722	10.6524	0	949.885
1960	0.1287	0	2.5602	1.1855	0.4929	80.5002	76.1264	274.544	5.6481	2.2959	0	0.9965	444.478
1961	10.2548	6.8018	0	0	0	19.6812	250.292	248.145	336.869	1.7008	3.3821	0	877.127
1962	5.8664	0.6979	11.2814	0.147	0.4819	28.7549	262.078	139.566	130.228	0	0.9374	25.4344	605.473
1963	0	0	0	2.6134	0	6.5242	109.423	311.104	147.812	1.1439	15.654	0.1166	594.392
1964	0	0	0	0	54.2629	1.4483	188.355	295.303	43.6464	0	0	0.1166	583.132
1965	0.6532	0	1.3187	0.5787	13.1437	11.6231	169.369	63.2494	23.0807	11.2841	0	0	294.3
1966	0	8.8817	0	0.5673	22.373	120.899	111.029	190.285	73.2515	0.2333	0.5433	0	528.063
1967	0	0	28.3169	1.2554	2.7705	71.5881	188.958	328.369	125.915	0	1.027	14.9037	763.103
1968	10.6912	4.6763	5.4567	0	3.6571	0	268.139	92.8825	0.8441	1.0504	0	0	387.398
1969	5.7246	2.8955	0	0	0	6.2367	242.202	205.712	153.928	0	0	0	616.699
1970	0	36.8616	0.4948	0	2.975	45.7034	237.106	216.393	91.027	2.3259	0	0	632.886
1971	1.5803	0.6298	0	0.2723	69.9655	352.726	283.527	126.908	101.993	2.9974	0	0	940.599
1972	0	7.0534	0	0.1361	0	106.987	82.0071	166.733	7.8116	5.552	1.2885	0	377.569
1973	3.938	10.9579	0	0	26.1348	23.0457	181.128	485.162	102.427	1.1617	0	0	833.955
1974	0	0	0	0	0.6898	40.663	553.371	159.139	0.1089	82.5778	0	2.4249	838.975
1975	0.5136	0.1634	0.9281	0	0.1634	74.3068	389.578	347.552	167.588	21.0062	0	0	1001.8
1976	2.0394	1.4815	0	0.3231	6.1252	76.6002	260.567	259.084	209.122	0	25.611	0	840.954
1977	16.6154	7.1229	0	0.1775	5.5498	81.0223	422.979	194.493	122.984	0	0	0.3267	851.27
1978	0	26.4519	18.3915	11.2987	0	85.3463	320.594	185.205	35.1161	0	2.2161	0.7659	685.386
1979	0.1634	52.3751	0.1815	0.1906	9.7098	49.3354	358.504	99.2977	12.2453	0	35.1908	0.775	617.968
1980	0	0	0	0	5.0523	80.409	182.12	106.379	48.1592	0	0.1815	10.0886	432.39
1981	2.9596	0	3.3251	0	1.015	20.1531	710.165	87.4125	68.5878	0	3.0431	0	896.662
1982	4.885	0	6.2505	10.4228	16.9067	22.5457	111.988	455.094	25.8075	0.3449	18.2036	14.1903	686.639
1983	0	0.7966	0	77.5166	33.1432	29.0298	337.907	181.765	235.172	27.1069	0	0	922.436
1984	0.3935	0	0	0	0	28.6144	89.616	200.155	60.9379	0	0	0	379.717
1985	0	0	0	10.7362	2.7523	10.5431	140.318	192.21	8.2263	111.299	0	26.4564	502.541
1986	0.3073	25.546	0	0	57.839	45.9041	309.425	96.1926	22.1766	0.5416	0	0	557.932
1987	0	1.6717	0	0	5.1925	19.7556	73.2804	154.84	22.1933	0.1272	0	13.7476	290.808
1988	0.1866	0	0	0	1.3976	75.7168	121.656	194.866	87.3362	2.6391	0	0	483.799
1989	0	0	4.6091	0	0	31.2828	80.4459	237.766	10.6879	0	0	0	364.791
1990	0	26.4612	0	0	2.047	68.7179	218.9	155.052	122.218	0	7.5408	0	600.936
1991	0	0	0	20.1625	8.45	8.8688	165.869	184.582	48.3271	0	4.8167	13.6435	454.72
1992	1.8988	7.877	11.0123	0	11.9972	0	213.024	227.203	64.5534	26.9273	0	0	564.493
1993	0	7.6142	0	3.4765	1.2703	82.8413	121.656	176.894	59.1759	0	0	0	452.928
1994	18.908	0	0	10.278	0.5121	44.2053	287.458	228.254	70.0505	0	0	0	659.666
1995	37.7617	1.5931	7.6667	0	0	2.7558	274.55	314.848	82.7987	0	0	0	721.973
1996	0.274	3.8972	3.985	12.7734	20.2548	32.7885	209.595	303.982	122.127	2.6658	0	0	712.343
1997	0	0	1.1015	1.2261	5.214	16.3204	193.786	160.582	111.207	70.4379	31.3849	27.5825	618.843
1998	0	0.193	1.1673	0.6542	0	7.9298	80.1074	137.668	133.189	23.3727	0	0	384.282
1999	0.2746	4.7318	0	0	1.8689	79.5483	270.297	46.4376	69.2235	19.5148	0	0	491.897
2000	0	0	0	0	37.011	3.9192	171.739	46.6455	24.4969	0.1449	0	0	283.956
2001	0	0	0.7904	9.4191	25.6935	27.7089	92.138	31.6272	3.3586	0	0	0	190.736
2002	1.0796	20.8758	0	0.1556	13.4163	27.7759	13.4515	32.4167	7.7425	0	0	1.078	117.992
2003	16.5243	31.4501	0	0	0.1159	53.152	191.577	221.322	84.0697	0	0	2.1763	600.387
2004	2.5105	0	0	1.3305	13.1754	19.9722	54.2368	431.985	15.0179	8.2931	0	0	546.522
2005	1.0257	0	22.6216	19.0081	4.3324	88.7527	231.57	26.6649	103.87	0	0	0	497.845
2006	0	0	9.0183	0	31.3134	53.3952	150.225	80.3255	19.2287	5.6393	0	0	349.145
2007	0	17.9189	11.3948	0	0.4903	87.8282	102.915	128.927	104.999	0	0	0	454.474
2008	0	0	0	1.1921	10.0594	123.31	177.946	204.527	104.832	0.8301	0	0	622.697
2009	0.184	0	0.5519	0	4.2852	9.0002	137.793	95.3448	20.2058	32.1306	13.2415	0.184	312.921
2010	6.2591	4.7143	0	0	0	7.1477	233.747	354.813	102.279	0.5574	76.9661	5.2473	791.731
2011	0	4.4879	0	0	0.5112	144.253	108.981	272.92	101.119	0	0	0	632.271
2012	3.9709	0	0	13.232	14.3334	3.1029	140.949	505.13	86.7063	0.1493	0	0	767.573
2013	0	13.8877	0.1231	0.6153	0.3693	79.9	252.139	403.722	14.9936	12.2589	0	0	778.008
2014	36.2317	15.3253	21.6827	7.2526	8.3485	9.1617	157.182	462.038	54.5398	13.1792	0	0	784.942
2015	13.3398	0	66.5533	27.1362	4.4499	60.126	140.554	155.013	12.5632	2.6961	0	0	482.432
2016	1.9636	0	2.7699	0	2.997	26.8954	353.278	323.608	23.1011	9.7723	0	0	744.385
2017	14.8559	0	3.9996	3.7111	26.6332	118.571	143.349	111.095	24.9732	0	0	4.4387	451.626
2018	0	0	0	0	2.4694	94.1428	188.856	110.187	150.745	0	0	0.7666	547.167
2019	10.5382	1.9636	0.2787	5.0251	0.6972	38.0284	293.668	368.344	147.908	0.3878	0.1091	4.2417	871.19
2020	5.6664	0	9.8975	8.8384	37.8628	34.8549	111.355	305.522	49.266	3.0655	11.6658	0	577.994
2021	9.3596	6.7626	1.8883	0	69.4092	50.6523	217.687	327.461	134.875	38.1514	0	0	856.247
MEAN	5.34429	5.67798	4.37363	3.70501	10.1538	52.406	212.38	220.84	78.0205	11.5381	4.03149	2.61676	611.088
STDEV	11.6227	10.4455	9.87064	10.4339	16.2925	51.0467	123.583	119.237	65.3777	25.2299	11.3827	6.23307	207.122
CV	217.479	183.965	225.685	281.617	160.457	97.4061	58.1895	53.9926	83.7955	218.666	282.344	238.198	33.894

## Sheet: Udaipur
Row Labels	Jan	Feb	Mar	Apr	May	Jun	Jul	Aug	Sep	Oct	Nov	Dec	Udaipur Annual Rainfall (1951-2021)
1951	0	0	0.305	0	7.2422	82.8527	173.146	90.5236	8.9954	3.3429	27.7316	0	394.14
1952	0.4881	4.3925	0	0	0	54.0351	466.225	145.144	23.6714	1.0264	0	0	694.982
1953	54.4164	0	0	17.6322	0.1966	101.455	140.636	278.383	104.598	1.0646	0	0	698.382
1954	0.5435	4.4371	17.2822	0	1.2713	119.753	236.55	114.505	372.942	2.3487	0	0	869.633
1955	0	5.4799	0	0	6.3301	71.4422	10.9973	223.172	227.598	26.8254	0	0	571.845
1956	0	1.8031	1.052	0.7314	7.4385	97.7058	246.524	124.923	98.9891	163.602	0	6.016	748.784
1957	24.2111	0	1.4782	0.7803	0.2789	99.5042	159.176	268.554	6.6511	3.016	11.2588	1.7785	576.688
1958	12.6725	0	0	0.5364	0.8955	49.9031	220.44	184.745	209.848	42.3955	9.5438	0	730.98
1959	1.3412	0	0	10.6704	9.1995	105.88	259.511	155.348	227.987	78.4743	2.611	0	851.023
1960	1.8721	0	0.4927	0.739	5.5067	112.865	176.8	293.173	10.5616	0	0	0.9853	602.996
1961	0	0.2463	0	0	14.7337	35.8976	186.482	109.577	306.833	14.4221	0	2.1734	670.364
1962	0	35.4106	10.716	23.8981	37.0119	82.6945	151.896	112.216	145.042	0	0	4.7023	603.588
1963	0	0	7.0131	4.089	1.1824	87.706	202.746	217.27	64.3489	60.7295	29.2098	0	674.295
1964	0	0	0	0	17.2991	90.2138	218.244	162.883	68.439	0	0	0	557.078
1965	17.4511	0.1077	0.6825	0.3177	4.0127	3.9764	203.473	161.5	32.7975	1.7861	0	0	426.104
1966	0.3569	1.9489	0	0	0	28.0884	158.259	81.3958	134.309	0	0.3093	0	404.666
1967	0	0	158.421	0.6111	4.1292	139.56	174.524	86.5972	202.669	0.3573	0	18.3461	785.214
1968	0	0	22.0149	0	11.7785	21.7828	295.282	236.2	40.6066	1.6569	0	0	629.322
1969	0	0	0	0	0	13.5101	122.745	215.284	95.4938	0	2.5465	1.2222	450.801
1970	0	22.0506	0	1.1069	6.5278	109.918	93.0478	383.467	92.6796	7.2285	0	0	716.026
1971	3.5755	0	0	5.9965	41.8962	113.697	223.224	147.513	44.5722	3.6498	0	0	584.124
1972	0	5.4971	0	0.136	4.1306	85.4503	65.5954	149.704	12.7791	0	0	0	323.293
1973	0	0	0	0	8.3643	69.4859	229.858	568.474	373.322	0.258	0	5.7014	1255.46
1974	0	0	0.1075	0.645	31.2463	17.1704	162.614	129.248	42.4698	64.3129	0	0.1075	447.921
1975	0	0	4.8846	2.0072	5.452	159.687	145.308	224.139	188.532	74.6462	0	0	804.656
1976	24.4652	3.4889	0	0	0	25.21	123.715	193.721	112.645	0.1805	71.6064	0	555.032
1977	16.896	2.4359	0	0.6987	39.8409	155.451	127.978	202.846	61.8455	0	0.1993	0	608.192
1978	0	6.5489	0.5457	0.7648	0	117.532	305.946	269.237	36.2853	1.9088	27.4838	1.0393	767.292
1979	0	4.1907	0	0.8194	43.2972	63.0273	131.044	74.6668	7.2578	10.6836	134.007	0.8158	469.81
1980	0	0	0	0	0	140.513	183.826	104.605	56.4331	5.8182	0	44.5229	535.719
1981	1.2005	0	9.3223	0	4.2791	77.3732	130.112	188.917	103.204	2.489	46.5832	1.7907	565.27
1982	5.4137	0.1091	0.4365	7.2326	60.7329	68.0284	115.69	167.134	41.0215	17.0861	127.347	1.6915	611.923
1983	0	0	0	3.3608	16.9833	224.387	201.137	241.483	159.986	23.2965	0	0	870.633
1984	0	0	0	0	0	66.6571	279.089	232.142	72.1644	0	0	0	650.052
1985	0	0	0	5.6528	3.7629	13.5704	136.06	329.964	21.389	93.8774	0	13.3189	617.595
1986	0	5.2658	0	15.7897	5.3975	37.7082	225.853	105.784	0	2.0588	0	0	397.858
1987	12.1252	0	0.284	0	2.4728	58.0561	23.2479	201.992	0.5549	0	0	25.6369	324.37
1988	0	0	0	14.7212	0.1178	57.4595	211.098	206.234	79.2633	7.0997	0	0	575.994
1989	5.1375	0	0	0	0	114.862	197.531	425.712	56.0396	0	11.8267	0	811.109
1990	0	7.5669	5.8436	0	35.096	72.1122	119.788	355.036	175.711	14.8391	0	0	785.993
1991	0	3.0518	0	20.0322	0	52.2537	443.795	88.6177	3.8538	0	12.5641	0	624.169
1992	1.3314	0	0	0	35.1257	76.0696	266.778	140.775	143.499	15.3396	6.0538	0	684.973
1993	0	8.6544	1.3632	20.3408	6.6794	77.5867	265.728	89.5222	50.9082	22.1909	0.1045	0	543.079
1994	3.3921	0	0	5.3727	2.476	178.756	191.008	332.137	256.651	0	0	0	969.793
1995	41.9713	0	0	0	4.3288	13.6344	233.182	64.1614	26.495	29.067	0	3.757	416.597
1996	0	0.228	0.3262	0.4207	0	57.0576	215.653	93.816	134.466	6.4994	0	0	508.467
1997	0	0	0	8.9399	13.1469	28.7655	103.019	116.429	87.4006	24.5057	5.7847	0.2104	388.202
1998	0	0.1578	0	12.9366	1.1569	37.3898	36.7061	72.5184	71.3614	39.1728	3.8915	0	275.291
1999	0	7.1519	0	0	5.1536	51.2204	90.9764	15.0402	41.96	0.7362	0	0	212.239
2000	0	0	0	14.9911	43.4349	35.3656	228.969	64.8285	42.1721	2.0507	0	0	431.812
2001	0	0	0	0.522	0	113.941	299.349	162.379	13.9491	2.2866	0	0	592.426
2002	0	1.0312	0	1.1592	0.5993	78.2771	4.5862	217.855	52.9727	0	0	2.0162	358.497
2003	0	18.8555	0	0	0	60.7288	216.008	98.9401	113.268	0.2208	0	0	508.021
2004	0	0	0	0	0.276	40.1963	254.807	264.428	96.7414	7.9261	0	0	664.375
2005	0	0	0	26.6109	9.9548	28.2184	222.297	161.693	242.717	0	0	0	691.491
2006	0	0	4.1585	0	12.3837	65.9518	241.758	609.114	67.4516	0	0	0	1000.82
2007	0	2.7601	0	0	11.0957	77.0007	227.855	202.384	14.8648	0	0	0.1104	536.07
2008	0	0	0	1.8989	15.1382	70.0679	197.303	156.858	80.84	0	0	0.7176	522.824
2009	0	0	4.5131	0	22.2045	79.3568	311.537	215.456	36.4692	0.9364	7.1831	0	677.657
2010	1.2134	0	0	0	0	55.1024	319.896	374.943	126.586	0	112.152	7.966	997.859
2011	0	0	0	0	0.3773	33.8074	223.998	315.932	215.994	0	0	0	790.109
2012	0	0	0	2.7277	20.4694	5.7585	301.7	318.017	220.882	0	0	0	869.555
2013	0	3.9739	0	9.0864	5.8971	115.292	394.392	223.483	114.144	54.4313	0.1203	0	920.819
2014	15.6151	0.9533	0	9.5742	18.8642	6.0972	223.94	156.745	281.062	0.552	0	0	713.404
2015	9.5103	0	25.3635	11.1086	0	82.2906	251.335	179.09	35.1173	0	0	0	593.816
2016	0	0	0.4922	0	0	46.8169	335.54	336.897	24.0712	65.1967	0	0	809.014
2017	7.422	0	0.186	0	18.8824	126.659	331.004	135.551	49.034	0	0	2.6037	671.342
2018	0	0	0	0	0.2178	72.0181	225.419	150.077	77.7909	2.2904	0	0	527.813
2019	3.3611	0	0	20.958	11.4935	177.53	133.058	490.959	186.434	63.8628	8.1592	0	1095.82
2020	0	0	26.3419	4.7101	15.6975	36.1201	139.026	390.317	200.888	13.0828	0.7811	0.1488	827.113
2021	0	0	3.5836	0	140.265	80.6541	102.988	81.7257	235.612	21.9948	158.412	16.2137	841.45
MEAN	3.74624	2.22251	4.3269	4.08912	12.02	74.7348	200.972	204.001	105.158	15.5327	11.5137	2.30412	640.621
STDEV	9.4868	5.57506	19.3667	6.79158	20.4953	44.8621	90.1909	117.745	90.7065	28.7529	32.2587	6.80069	197.698
CV	253.235	250.846	447.588	166.089	170.509	60.0285	44.8773	57.7175	86.2577	185.112	280.177	295.153	30.8604
	3.1149	1.67186	1.18014	4.58173	11.4781	75.1153	206.741	211.576	92.9517	13.4586	11.7361	2.28584	635.891
	7.64109	3.45556	3.98031	6.99538	15.082	48.038	91.502	127.755	82.8957	23.2949	31.8061	7.48641	218.472
